# Supplementary material for: Proteomic Analyses of Agkistrodon contortrix contortrix Venom Using 2D Electrophoresis and MS Techniques
Source: PubMed Central journal article supplement (PMC5198566; doi:10.3390/toxins8120372), 2016-12-13
Supplement: toxins-08-00372-s001.pdf [file toxins-08-00372-s001.pdf]

# Supplementary Materials: Proteomic Analyses of *Agkistrodon contortrix contortrix* Venom Using 2D Electrophoresis and MS Techniques

Aleksandra Bocian, Małgorzata Urbanik, Konrad Hus, Andrzej Łyskowski, Vladimír Petrilla, Zuzana Andrejčáková, Monika Petrillová and Jaroslav Legath

Selected MS and MS/MS annotated spectra used for protein and peptide identification.

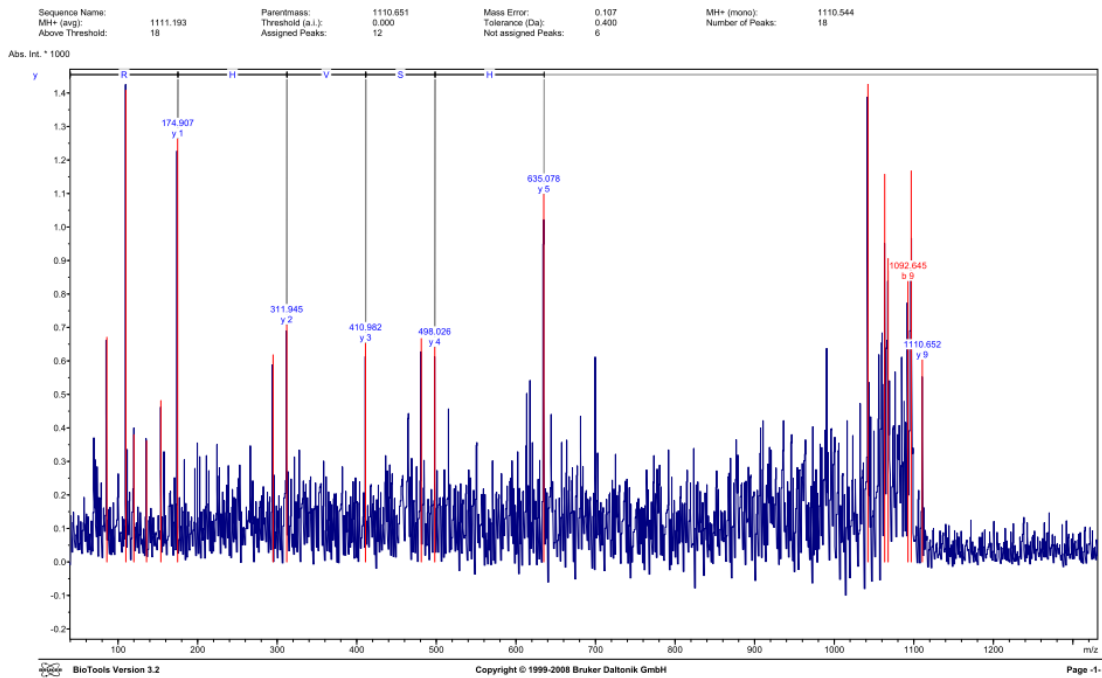

(A)

Display Parameter: Parentmass: 1110.651, Mass Error: 0.107, MH+ (mono): 1110.544, MH+ (avg): 1111.193, Threshold (a.i.): 0.000, Tolerance (Da): 0.400, Number of Peaks: 18, Above Threshold: 18, Assigned Peaks: 12, Not assigned Peaks: 6

| Peak | Mass     | Intensity | Peak | Mass     | Intensity | Peak | Mass     | Intensity | Peak | Mass     | Intensity | Peak | Mass     | Intensity |
|------|----------|-----------|------|----------|-----------|------|----------|-----------|------|----------|-----------|------|----------|-----------|
| 1    | 85.931   | 0.1       | 2    | 109.895  | 0.1       | 3    | 119.894  | 0.1       | 4    | 135.894  | 0.1       | 5    | 153.888  | 0.1       |
| 6    | 174.907  | 1.2       | 7    | 204.913  | 0.5       | 8    | 311.945  | 0.7       | 9    | 410.982  | 0.6       | 10   | 481.006  | 0.5       |
| 11   | 498.026  | 0.6       | 12   | 635.078  | 1.0       | 13   | 1042.283 | 0.5       | 14   | 1063.307 | 0.5       | 15   | 1067.793 | 0.5       |
| 16   | 1092.645 | 0.8       | 17   | 1092.645 | 0.8       | 18   | 1110.652 | 1.4       |      |          |           |      |          |           |

Calculated Masses: QAFHSVHR

| N-Term | Ion | a        | a-17     | a-18     | b        | b-17     | b-18     | b+18     | c        | i       | x        | y        | z        | C-Term | Ion |
|--------|-----|----------|----------|----------|----------|----------|----------|----------|----------|---------|----------|----------|----------|--------|-----|
| 1      | Q   | 101.071  | 84.044   | 83.060   | 129.066  | 112.039  | 111.055  | 147.076  | 146.092  | 101.071 | 201.098  | 175.119  | 158.092  | S      | R   |
| 2      | A   | 172.100  | 155.082  | 154.097  | 200.103  | 183.076  | 182.092  | 218.114  | 217.130  | 44.089  | 338.157  | 312.178  | 295.151  | S      | H   |
| 3      | F   | 319.170  | 302.150  | 301.165  | 341.171  | 324.145  | 323.161  | 365.182  | 364.198  | 120.881 | 431.220  | 411.248  | 394.220  | F      | V   |
| 4      | E   | 448.210  | 431.193  | 430.208  | 478.214  | 459.187  | 458.203  | 494.225  | 493.241  | 102.055 | 524.258  | 498.278  | 481.252  | E      | S   |
| 5      | H   | 585.270  | 568.251  | 567.267  | 613.273  | 594.246  | 593.262  | 631.283  | 630.299  | 110.071 | 661.310  | 636.337  | 619.311  | H      |     |
| 6      | S   | 672.310  | 655.293  | 654.299  | 700.305  | 683.278  | 682.294  | 719.315  | 717.331  | 40.344  | 750.359  | 724.380  | 717.353  | S      | A   |
| 7      | V   | 773.370  | 754.352  | 753.368  | 799.375  | 782.347  | 781.363  | 817.384  | 816.400  | 72.081  | 837.427  | 811.448  | 804.422  | V      |     |
| 8      | H   | 808.420  | 791.411  | 790.427  | 836.433  | 819.406  | 818.422  | 854.443  | 853.459  | 110.071 | 1029.461 | 1003.485 | 993.459  | H      |     |
| 9      | R   | 1064.538 | 1047.512 | 1046.528 | 1092.533 | 1075.507 | 1074.523 | 1110.544 | 1109.560 | 129.113 | 1138.523 | 1110.544 | 1093.517 | R      | Q   |

(B)

Figure S1. Annotated MS/MS spectrum of ion 1110.651 m/z detected in area #1. (A) MS/MS spectrum; (B) Peak list and amino acid sequence.

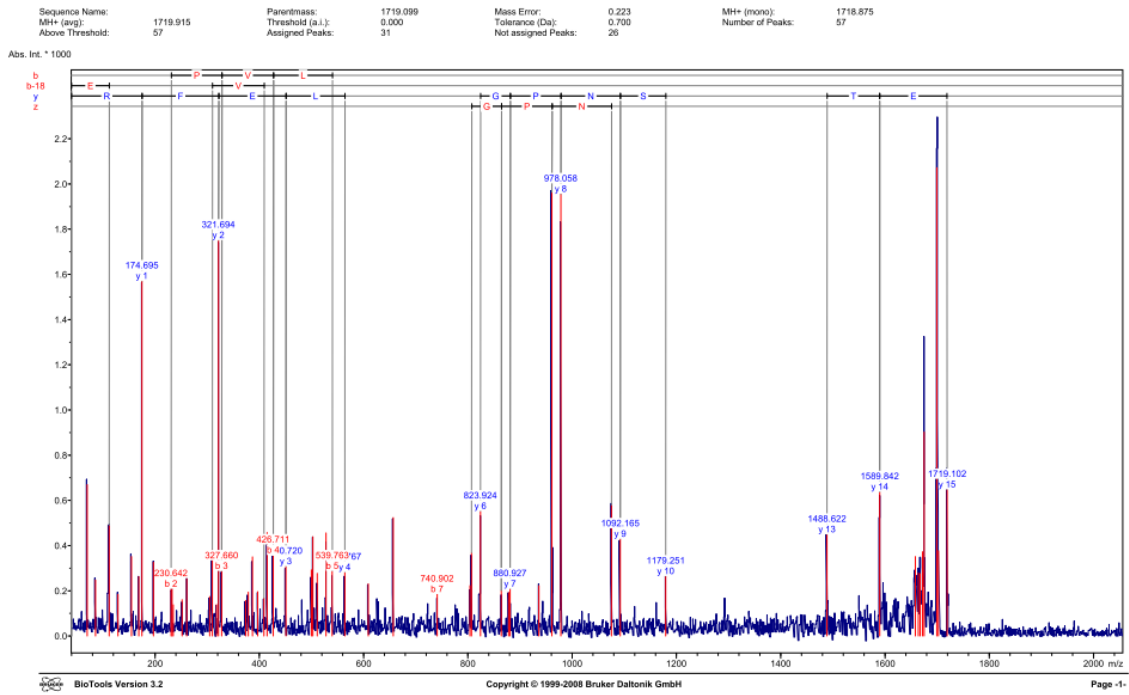

(A)

Display Parameter: Parentmass: 1719.099 Mass Error: 0.223 MH+ (mono): 1718.875 MH+ (avg): 1719.915  
 Threshold (a.l.): 0.000 Tolerance (Da): 0.700 Number of Peaks: 57 Above Threshold: 57  
 Assigned Peaks: 31 Not assigned Peaks: 26

| Peak# | Mass     | Intensity | Peak | Mass     | Intensity | Peak | Mass     | Intensity | Peak | Mass     | Intensity | Peak | Mass     | Intensity |
|-------|----------|-----------|------|----------|-----------|------|----------|-----------|------|----------|-----------|------|----------|-----------|
| 1     | 89.765   | 669.717   | 2    | 85.752   | 247.859   | 3    | 111.729  | 485.472   | 4    | 128.737  | 384.337   | 5    | 154.879  | 351.681   |
| 6     | 168.738  | 262.876   | 7    | 174.695  | 1570.659  | 8    | 198.701  | 326.898   | 9    | 230.642  | 208.711   | 10   | 232.668  | 229.852   |
| 11    | 234.620  | 138.181   | 12   | 251.878  | 161.133   | 13   | 260.449  | 295.508   | 14   | 304.680  | 174.751   | 15   | 309.689  | 352.686   |
| 16    | 317.630  | 138.609   | 17   | 321.694  | 1751.162  | 18   | 327.660  | 288.010   | 19   | 373.711  | 157.517   | 20   | 378.720  | 194.354   |
| 21    | 386.704  | 349.862   | 22   | 396.732  | 196.104   | 23   | 408.713  | 167.135   | 24   | 414.694  | 457.456   | 25   | 426.711  | 358.421   |
| 26    | 450.720  | 368.492   | 27   | 469.766  | 292.536   | 28   | 502.731  | 438.030   | 29   | 510.739  | 276.664   | 30   | 527.751  | 438.034   |
| 31    | 539.753  | 288.031   | 32   | 563.767  | 259.876   | 33   | 608.795  | 231.049   | 34   | 656.798  | 523.770   | 35   | 740.802  | 185.291   |
| 39    | 803.895  | 222.896   | 37   | 806.896  | 307.889   | 38   | 823.924  | 552.701   | 39   | 863.920  | 201.520   | 40   | 877.902  | 192.451   |
| 41    | 880.927  | 268.891   | 42   | 936.961  | 222.741   | 43   | 961.021  | 1963.224  | 44   | 978.069  | 1956.364  | 45   | 1076.111 | 578.865   |
| 46    | 1092.165 | 420.696   | 47   | 1179.251 | 254.951   | 48   | 1488.622 | 448.788   | 49   | 1589.842 | 638.157   | 50   | 1658.138 | 351.306   |
| 51    | 1663.882 | 278.621   | 52   | 1667.335 | 275.526   | 53   | 1671.712 | 372.741   | 54   | 1676.135 | 902.221   | 55   | 1699.293 | 2072.240  |
| 56    | 1702.392 | 377.086   | 57   | 1719.102 | 648.185   |      |          |           |      |          |           |      |          |           |

Calculated Masses:  
 ETPVLSNFGPTLEFR

| N-Term | Ion | a        | a-17     | a-18     | b        | b-17     | b-18     | b+18     | c        | f       | x        | y        | z        | C-Term | Ion |
|--------|-----|----------|----------|----------|----------|----------|----------|----------|----------|---------|----------|----------|----------|--------|-----|
| 1      | F   | 102.051  | 85.028   | 84.344   | 130.050  | 113.023  | 112.039  | 148.060  | 147.076  | 182.065 | 201.098  | 175.119  | 158.092  | 15     | R   |
| 2      | F   | 203.103  | 186.076  | 185.092  | 231.099  | 214.071  | 213.087  | 249.108  | 248.124  | 284.060 | 348.167  | 322.187  | 305.161  | 14     | P   |
| 3      | P   | 300.155  | 283.129  | 282.145  | 328.150  | 311.124  | 310.140  | 346.161  | 345.177  | 380.165 | 477.209  | 451.230  | 434.203  | 13     | E   |
| 4      | V   | 396.220  | 382.197  | 381.213  | 427.219  | 410.192  | 409.208  | 445.229  | 444.245  | 472.261 | 590.293  | 564.314  | 547.287  | 12     | L   |
| 5      | L   | 512.308  | 495.281  | 494.297  | 540.303  | 523.276  | 522.292  | 558.313  | 557.329  | 666.366 | 763.397  | 737.377  | 710.351  | 11     | Y   |
| 6      | S   | 599.340  | 582.313  | 581.329  | 627.335  | 610.308  | 609.324  | 645.345  | 644.361  | 804.444 | 850.499  | 824.430  | 807.404  | 10     | P   |
| 7      | N   | 713.381  | 696.356  | 695.372  | 741.378  | 724.351  | 723.367  | 759.388  | 758.404  | 877.455 | 897.431  | 881.452  | 864.425  | 9      | G   |
| 8      | P   | 810.438  | 793.409  | 792.425  | 838.431  | 821.404  | 820.420  | 856.441  | 855.457  | 70.865  | 1004.484 | 978.504  | 961.478  | 8      | P   |
| 9      | G   | 867.457  | 850.431  | 849.446  | 895.452  | 878.425  | 877.441  | 913.463  | 912.479  | 30.034  | 1118.527 | 1092.547 | 1075.521 | 7      | N   |
| 10     | P   | 964.510  | 947.483  | 946.499  | 992.505  | 975.478  | 974.494  | 1010.515 | 1009.531 | 70.865  | 1205.559 | 1179.579 | 1162.553 | 6      | S   |
| 11     | V   | 1127.573 | 1110.547 | 1109.563 | 1155.568 | 1138.542 | 1137.557 | 1173.579 | 1172.595 | 138.078 | 1318.643 | 1292.663 | 1276.637 | 5      | L   |
| 12     | L   | 1240.657 | 1223.631 | 1222.647 | 1268.652 | 1251.626 | 1250.642 | 1286.663 | 1285.679 | 86.996  | 1417.711 | 1391.732 | 1374.705 | 4      | V   |
| 13     | E   | 1369.700 | 1352.674 | 1351.689 | 1397.695 | 1380.669 | 1379.684 | 1415.705 | 1414.721 | 122.055 | 1514.764 | 1488.785 | 1471.758 | 3      | P   |
| 14     | F   | 1516.768 | 1499.742 | 1498.758 | 1544.763 | 1527.737 | 1526.753 | 1562.774 | 1561.790 | 120.081 | 1615.811 | 1589.832 | 1572.806 | 2      | T   |
| 15     | R   | 1672.869 | 1655.843 | 1654.859 | 1700.864 | 1683.838 | 1682.854 | 1718.875 | 1717.891 | 129.113 | 1744.854 | 1718.875 | 1701.848 | 1      | E   |

(B)

Figure S2. Annotated MS/MS spectrum of ion 1719.099 m/z detected in area #1. (A) MS/MS spectrum; (B) Peak list and amino acid sequence.

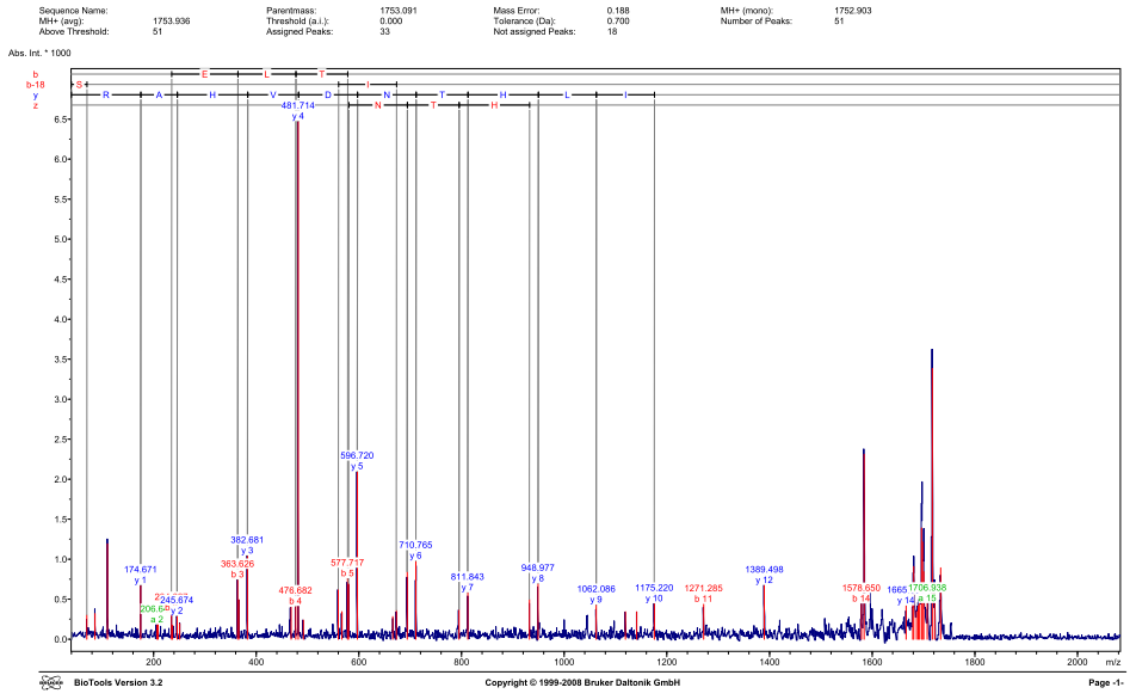

(A)

Display Parameter: Parentmass: 1753.091; Mass Error: 0.188; MH+ (mono): 1752.903; MH+ (avg): 1753.936; Threshold (a.i.): 0.000; Tolerance (Da): 0.700; Number of Peaks: 51; Above Threshold: 51; Assigned Peaks: 33; Not assigned Peaks: 18

| Peak# | Mass     | Intensity | Peak | Mass     | Intensity | Peak | Mass     | Intensity | Peak | Mass     | Intensity | Peak | Mass     | Intensity |
|-------|----------|-----------|------|----------|-----------|------|----------|-----------|------|----------|-----------|------|----------|-----------|
| 1     | 69.750   |           | 2    | 85.728   |           | 3    | 109.704  |           | 4    | 1194.728 |           | 5    | 206.648  |           |
| 6     | 206.671  |           | 7    | 234.627  |           | 8    | 236.654  |           | 9    | 245.674  |           | 10   | 250.663  |           |
| 11    | 383.026  |           | 12   | 385.072  |           | 13   | 382.681  |           | 14   | 487.640  |           | 15   | 476.682  |           |
| 16    | 487.714  |           | 17   | 491.623  |           | 18   | 556.713  |           | 19   | 568.689  |           | 20   | 577.711  |           |
| 21    | 579.708  |           | 22   | 596.720  |           | 23   | 665.760  |           | 24   | 672.764  |           | 25   | 693.766  |           |
| 26    | 710.765  |           | 27   | 754.823  |           | 28   | 811.843  |           | 29   | 831.930  |           | 30   | 946.977  |           |
| 31    | 1062.086 |           | 32   | 1119.110 |           | 33   | 1141.063 |           | 34   | 1173.220 |           | 35   | 1271.285 |           |
| 36    | 1389.498 |           | 37   | 1578.650 |           | 38   | 1583.607 |           | 39   | 1665.690 |           | 40   | 1678.639 |           |
| 41    | 1680.650 |           | 42   | 1660.669 |           | 43   | 1669.670 |           | 44   | 1691.671 |           | 45   | 1695.670 |           |
| 46    | 1697.684 |           | 47   | 1754.676 |           | 48   | 1736.658 |           | 49   | 1738.616 |           | 50   | 1741.676 |           |
| 51    | 1753.024 |           | 52   | 891.910  |           |      |          |           |      |          |           |      |          |           |

Calculated Masses: SFE...LH...TNDVHAR

| N-Term | Ion | a        | a-17     | a-18     | b        | b-17     | b-18     | b+18     | c        | i       | x        | y        | z        | C-Term | Ion |
|--------|-----|----------|----------|----------|----------|----------|----------|----------|----------|---------|----------|----------|----------|--------|-----|
| 1      | S   | 60.044   | 43.018   | 42.034   | 85.039   | 71.013   | 70.029   | 106.050  | 105.066  | 60.044  | 201.098  | 175.119  | 158.092  | 15     | R   |
| 2      | F   | 207.113  | 180.086  | 169.102  | 235.168  | 218.081  | 217.097  | 253.118  | 252.134  | 120.081 | 272.135  | 246.156  | 229.139  | 14     | A   |
| 3      | E   | 336.155  | 319.129  | 318.145  | 344.190  | 327.124  | 326.140  | 382.161  | 381.177  | 102.055 | 409.194  | 383.219  | 366.188  | 13     | H   |
| 4      | L   | 449.239  | 432.213  | 431.229  | 477.234  | 460.208  | 459.224  | 495.245  | 494.261  | 88.096  | 508.263  | 482.283  | 465.257  | 12     | V   |
| 5      | T   | 550.287  | 533.261  | 532.277  | 578.282  | 561.256  | 560.271  | 596.293  | 595.309  | 74.050  | 623.290  | 607.310  | 589.284  | 11     | D   |
| 6      | I   | 663.371  | 646.345  | 645.361  | 691.366  | 674.340  | 673.356  | 709.377  | 708.393  | 88.096  | 737.333  | 711.353  | 694.327  | 10     | N   |
| 7      | L   | 776.455  | 759.429  | 758.445  | 804.450  | 787.424  | 786.440  | 822.461  | 821.477  | 88.096  | 838.380  | 812.401  | 795.374  | 9      | T   |
| 8      | H   | 873.514  | 856.488  | 855.504  | 901.509  | 884.483  | 883.499  | 919.520  | 918.536  | 110.071 | 915.439  | 889.460  | 872.433  | 8      | H   |
| 9      | T   | 1014.582 | 997.556  | 996.571  | 1042.577 | 1025.550 | 1024.566 | 1060.587 | 1059.603 | 74.050  | 1088.523 | 1062.544 | 1045.517 | 7      | L   |
| 10     | N   | 1128.605 | 1111.579 | 1110.594 | 1156.600 | 1139.573 | 1138.589 | 1174.610 | 1173.626 | 87.055  | 1201.607 | 1175.628 | 1158.601 | 6      | I   |
| 11     | D   | 1243.632 | 1226.605 | 1225.621 | 1271.627 | 1254.600 | 1253.616 | 1289.637 | 1288.653 | 88.099  | 1302.625 | 1276.645 | 1259.619 | 5      | L   |
| 12     | V   | 1342.700 | 1325.674 | 1324.690 | 1370.695 | 1353.669 | 1352.684 | 1388.705 | 1387.721 | 72.081  | 1415.709 | 1389.730 | 1372.703 | 4      | L   |
| 13     | H   | 1479.759 | 1462.733 | 1461.748 | 1507.754 | 1490.727 | 1489.743 | 1525.765 | 1524.781 | 110.071 | 1544.782 | 1518.802 | 1501.776 | 3      | E   |
| 14     | A   | 1550.789 | 1533.763 | 1532.778 | 1578.781 | 1561.755 | 1560.771 | 1596.792 | 1595.808 | 44.049  | 1611.850 | 1585.871 | 1568.844 | 2      | F   |
| 15     | R   | 1706.897 | 1689.871 | 1688.887 | 1734.892 | 1717.866 | 1716.882 | 1752.903 | 1751.919 | 129.113 | 1778.882 | 1752.903 | 1735.876 | 1      | S   |

(B)

Figure S3. Annotated MS/MS spectrum of ion 1753.091 m/z detected in area #1. (A) MS/MS spectrum; (B) Peak list and amino acid sequence.

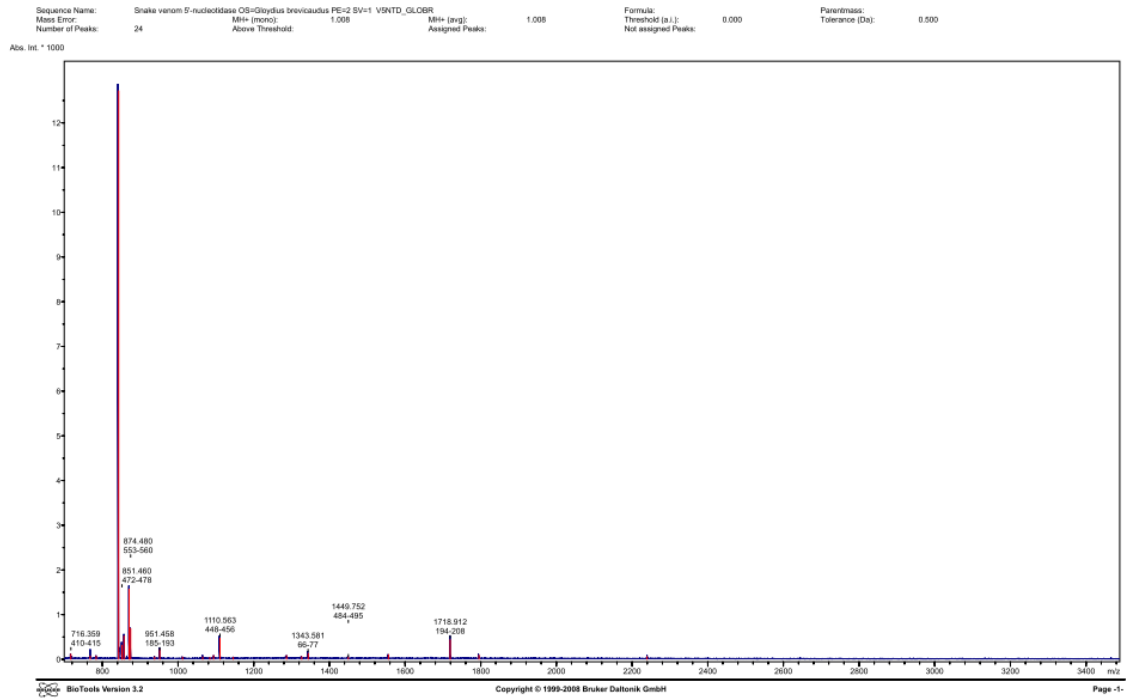

(A)

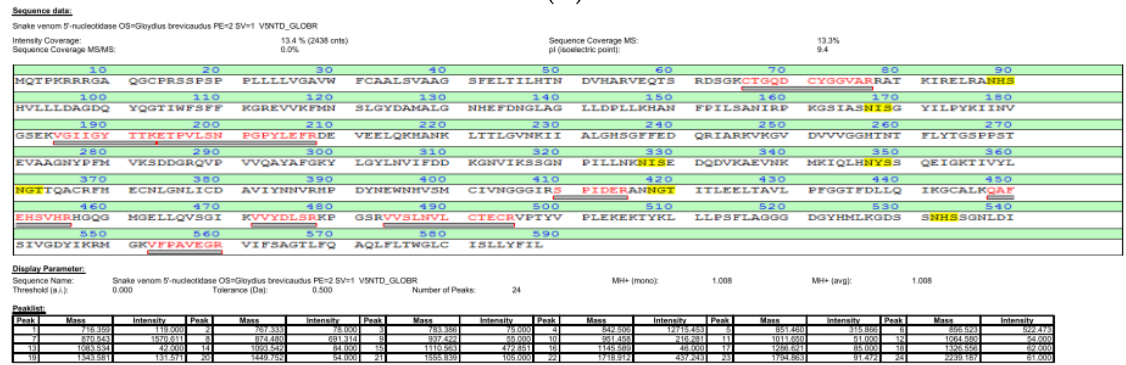

(B)

Figure S4. Annotated MS spectrum detected in area #1. (A) MS spectrum; (B) Peak list and sequence data.

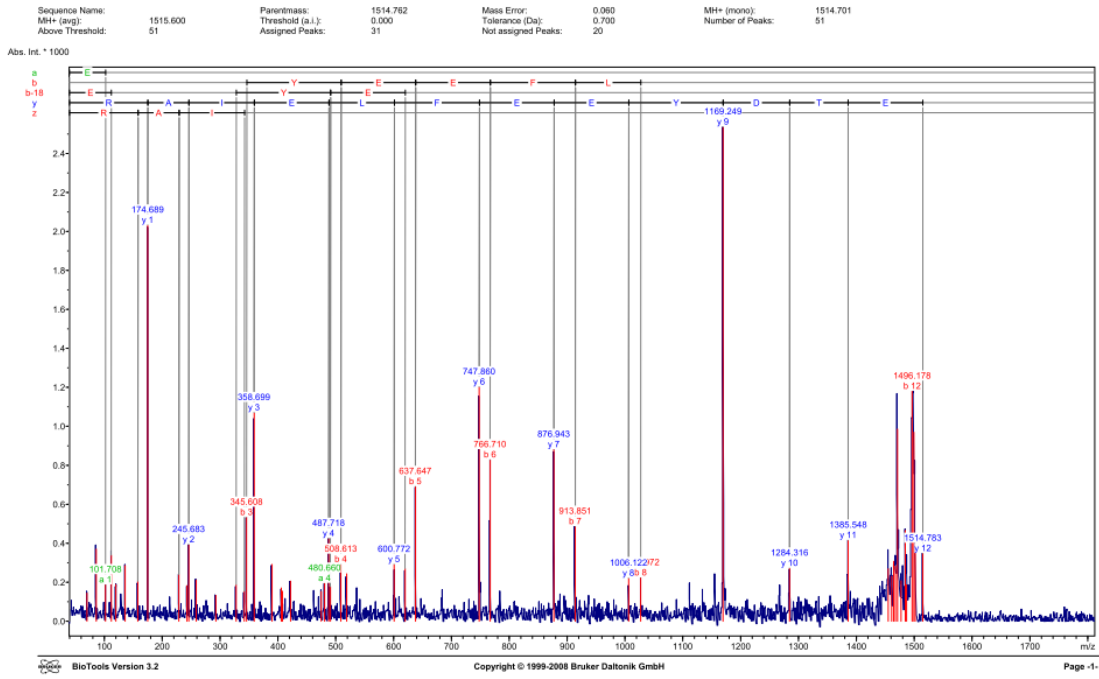

(A)

Display Parameter:

Parentmass: 1514.762 Mass Error: 0.060 MH+ (mono): 1514.701 MH+ (avg): 1515.600  
 Threshold (a.l.): 0.000 Tolerance (Da): 0.700 Number of Peaks: 51 Above Threshold: 51  
 Assigned Peaks: 31 Not assigned Peaks: 20

Peaklist:

| Peak | Mass     | Intensity | Peak | Mass     | Intensity | Peak | Mass     | Intensity | Peak | Mass     | Intensity | Peak | Mass     | Intensity |
|------|----------|-----------|------|----------|-----------|------|----------|-----------|------|----------|-----------|------|----------|-----------|
| 1    | 69.798   | 144.342   | 2    | 85.785   | 370.802   | 3    | 101.706  | 188.694   | 4    | 111.735  | 336.748   | 5    | 119.703  | 189.862   |
| 6    | 135.687  | 286.051   | 7    | 157.863  | 206.626   | 8    | 174.689  | 2034.276  | 9    | 228.669  | 241.341   | 10   | 242.679  | 183.162   |
| 11   | 245.693  | 394.207   | 12   | 258.634  | 211.891   | 13   | 292.632  | 132.922   | 14   | 327.606  | 186.866   | 15   | 341.647  | 153.274   |
| 18   | 345.630  | 534.592   | 17   | 358.699  | 1071.347  | 18   | 389.690  | 282.154   | 19   | 405.622  | 171.036   | 20   | 407.626  | 154.817   |
| 21   | 421.581  | 296.166   | 22   | 474.613  | 152.614   | 23   | 490.660  | 195.809   | 24   | 487.718  | 425.368   | 25   | 490.678  | 177.852   |
| 28   | 508.613  | 293.197   | 27   | 518.658  | 243.713   | 28   | 600.722  | 282.860   | 29   | 619.695  | 270.396   | 30   | 637.647  | 692.762   |
| 31   | 747.660  | 1263.182  | 32   | 766.710  | 830.132   | 33   | 876.843  | 882.512   | 34   | 813.851  | 487.623   | 35   | 1006.122 | 221.689   |
| 38   | 1169.912 | 224.338   | 37   | 1169.249 | 2537.812  | 38   | 1284.318 | 273.534   | 39   | 1385.548 | 417.008   | 40   | 1454.804 | 289.168   |
| 41   | 1460.778 | 251.452   | 42   | 1464.070 | 308.232   | 43   | 1487.354 | 282.247   | 44   | 1470.776 | 886.059   | 45   | 1477.052 | 207.887   |
| 46   | 1484.218 | 466.328   | 47   | 1486.673 | 187.193   | 48   | 1496.178 | 1182.011  | 49   | 1499.215 | 969.785   | 50   | 1501.447 | 354.050   |
| 51   | 1514.763 | 349.679   |      |          |           |      |          |           |      |          |           |      |          |           |

Calculated Masses:

ETDVEEFLLEIAR

| N-Term | Ion | a        | a-17     | a-18     | b        | b-17     | b-18     | b+18     | c        | i       | x        | y        | z        | C-Term | Ion |
|--------|-----|----------|----------|----------|----------|----------|----------|----------|----------|---------|----------|----------|----------|--------|-----|
| 2      | T   | 102.055  | 85.028   | 84.044   | 130.050  | 113.023  | 112.039  | 148.060  | 147.076  | 102.055 | 201.098  | 175.119  | 158.092  | 12     | R   |
| 3      | D   | 203.107  | 186.076  | 185.092  | 231.099  | 214.071  | 213.087  | 249.106  | 248.124  | 74.060  | 272.130  | 246.156  | 229.130  | 11     | A   |
| 4      | V   | 481.193  | 464.166  | 463.182  | 509.188  | 492.161  | 491.177  | 527.196  | 526.214  | 136.076 | 514.262  | 488.283  | 471.256  | 9      | E   |
| 5      | E   | 810.230  | 793.209  | 792.225  | 838.230  | 821.204  | 820.220  | 856.241  | 855.257  | 102.055 | 827.340  | 801.367  | 784.340  | 8      | L   |
| 6      | E   | 795.270  | 778.252  | 777.268  | 797.273  | 780.246  | 779.262  | 795.281  | 794.300  | 102.055 | 774.414  | 748.435  | 731.409  | 7      | E   |
| 7      | F   | 886.347  | 869.320  | 868.336  | 914.341  | 897.315  | 896.331  | 932.352  | 931.368  | 120.081 | 903.457  | 877.478  | 860.451  | 6      | E   |
| 8      | E   | 995.431  | 980.404  | 981.420  | 1022.423 | 1010.399 | 1009.415 | 1045.436 | 1044.452 | 86.986  | 1032.509 | 1006.530 | 989.504  | 5      | E   |
| 9      | E   | 1128.473 | 1111.447 | 1110.463 | 1152.466 | 1139.442 | 1138.458 | 1174.470 | 1173.486 | 102.055 | 1156.563 | 1169.584 | 1152.557 | 4      | Y   |
| 10     | I   | 1241.557 | 1224.531 | 1223.547 | 1269.552 | 1252.526 | 1251.542 | 1287.563 | 1286.579 | 86.996  | 1310.660 | 1284.611 | 1267.584 | 3      | D   |
| 11     | A   | 1312.599 | 1296.569 | 1294.584 | 1340.591 | 1323.563 | 1322.579 | 1359.600 | 1357.616 | 44.049  | 1411.639 | 1385.569 | 1368.612 | 2      | E   |
| 12     | R   | 1468.655 | 1451.629 | 1450.645 | 1496.650 | 1479.624 | 1478.640 | 1514.701 | 1513.717 | 129.113 | 1540.660 | 1514.701 | 1487.674 | 1      | E   |

(B)

Figure S5. Annotated MS/MS spectrum of ion 1514.762 m/z detected in area #2. (A) MS/MS spectrum. (B) Peak list and amino acid sequence.

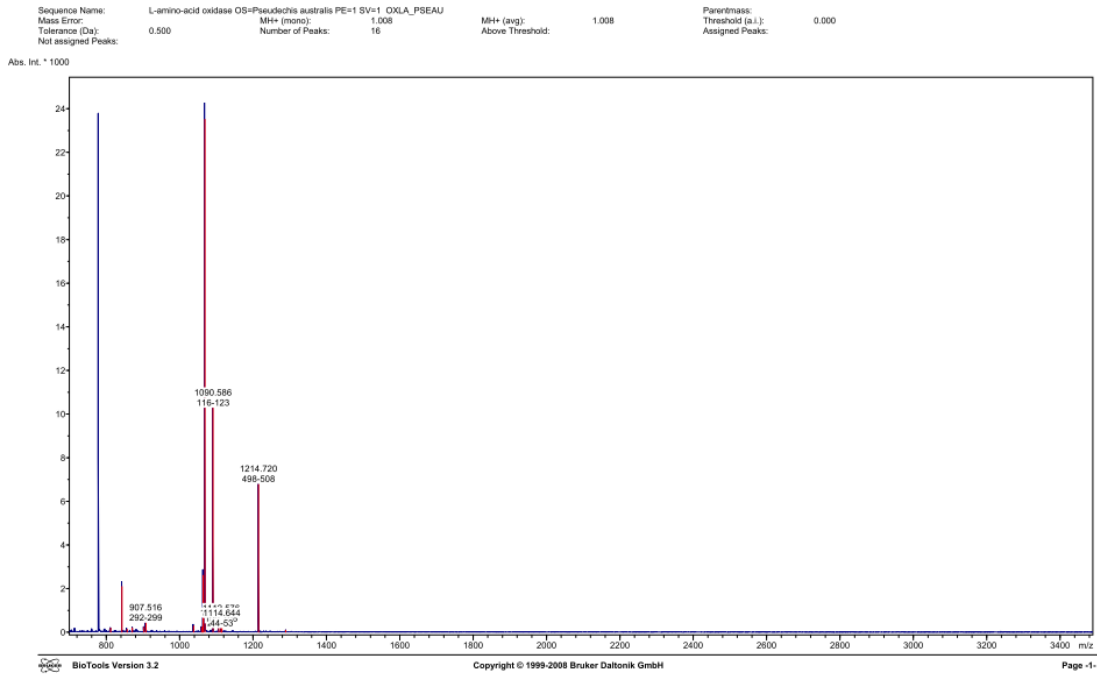

(A)

Sequence data:

L-amino-acid oxidase OS=Pseudechis australis PE=1 SV=1 OXLA\_PSEAU

Intensity Coverage: 37.9 % (18125 conts)  
 Sequence Coverage MS: 10.4%  
 Sequence Coverage MS/MS: 0.0% pl (isoelectric point): 6.3

|            |            |            |            |            |            |            |            |            |            |            |           |            |            |
|------------|------------|------------|------------|------------|------------|------------|------------|------------|------------|------------|-----------|------------|------------|
| 10         | 20         | 30         | 40         | 50         | 60         | 70         | 80         | 90         | 100        | 110        | 120       | 130        | 140        |
| MDVFFRFSLL | FLAALGSCAD | DRRPLEECF  | READYEEFLE | IARNGLQRTS | NFPRVVVQGA | GMAGLSAAYV | LAGAGHQVTL | LEASERVQGR | VNTYRNEKDG | UYVNLGPRRL | FERHRIREY | IRKFOLELNE | FIQENDNAVY |
| 150        | 160        | 170        | 180        | 190        | 200        | 210        | 220        | 230        | 240        | 250        | 260       | 270        | 280        |
| FIKIHRRVS  | EVKKEPQVFR | IPVPRSEKGR | SASQLTRSL  | QRVIEELKRT | NGNFIILNVD | TTSTKELIK  | EGHLSGAVD  | RIGDLNESD  | STYLSFIESL | KSDDFSTEK  | RFRIVGGFD | QLPKSNYQAI | AEKRVLNAGV |
| 300        | 310        | 320        | 330        | 340        | 350        | 360        | 370        | 380        | 390        | 400        | 410       | 420        | 430        |
| IKIQNAEDV  | RVTYQTPAKT | LSVVIADYVI | VCSTRRAARR | IRFEPFLPK  | KAKALRSIHY | RSSTKIFLTC | SGRFVADGI  | HGGKSTDLF  | SRFIYTNNS  | FTSIOIVIVA | VTIADDTDF | QALDIETSD  | IVINDLSLIR |
| 430        | 440        | 450        | 460        | 470        | 480        | 490        | 500        | 510        | 520        |            |           |            |            |
| QLPKKIQAL  | CYPSKIQRUS | LDEYFAGAIT | SFTPVQFQDF | FEIVAAPVGR | IYFAGEYTS  | VRGWLDTIK  | SGLTAARDVN | LASQKPSRI  | IQ         | LSDINNEL   |           |            |            |

Display Parameter:

Sequence Name: L-amino-acid oxidase OS=Pseudechis australis PE=1 SV=1 OXLA\_PSEAU  
 MH+ (avg): 1.008 MH+ (mono): 1.008  
 Threshold (a.i.): 0.000 Tolerance (Da): 0.500 Number of Peaks: 16

Peaklist:

| Peak | Mass     | Intensity | Peak | Mass     | Intensity | Peak | Mass     | Intensity | Peak | Mass     | Intensity | Peak | Mass     | Intensity |
|------|----------|-----------|------|----------|-----------|------|----------|-----------|------|----------|-----------|------|----------|-----------|
| 0    | 81.451   | 65.487    | 2    | 82.537   | 203.441   | 3    | 86.554   | 1.26473   | 4    | 87.571   | 165.672   | 8    | 102.434  | 2.9300    |
| 9    | 907.510  | 434.994   | 1    | 1037.598 | 289.464   | 6    | 1099.502 | 235.579   | 9    | 1063.592 | 2602.595  | 10   | 1065.604 | 23503.714 |
| 11   | 1090.586 | 10291.882 | 12   | 1106.586 | 202.855   | 13   | 1112.576 | 400.537   | 14   | 1114.644 | 189.146   | 15   | 1214.720 | 6794.976  |
| 16   | 1268.657 | 65.256    |      |          |           |      |          |           |      |          |           |      |          |           |

(B)

Figure S6. Annotated MS spectrum detected in area #2. (A) MS spectrum; (B) Peak list and sequence data.

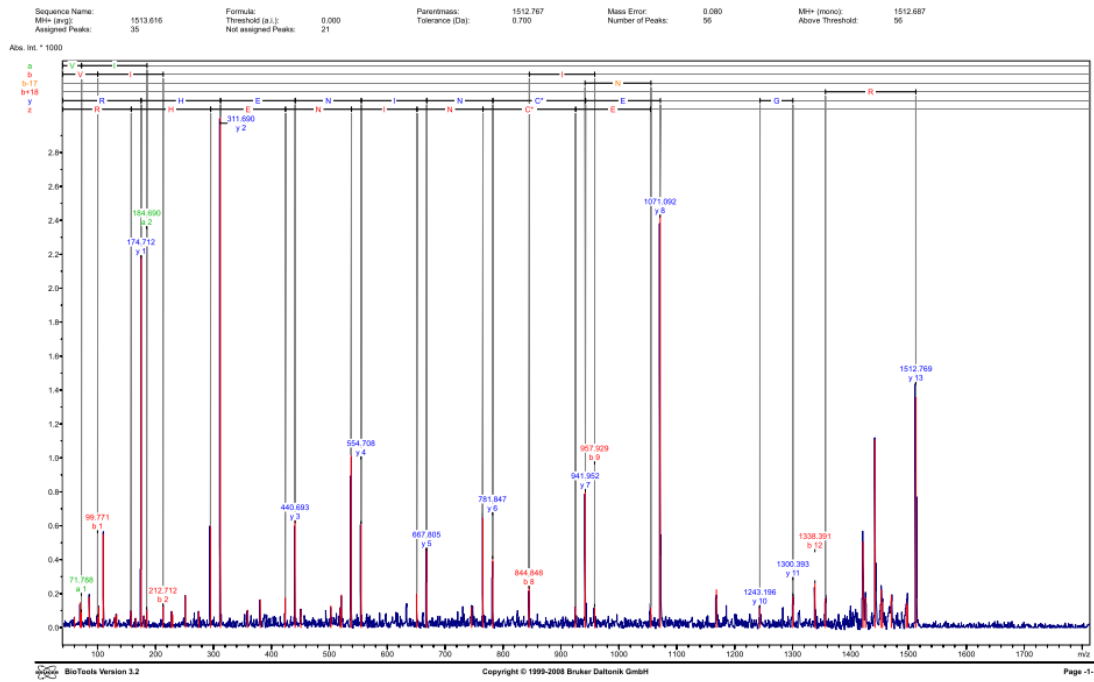

(A)

Display Parameter: Parentmass: 1512.767, Mass Error: 0.080, MH+ (mono): 1512.687, MH+ (avg): 1513.616, Threshold (a.l.): 0.000, Tolerance (Da): 0.700, Number of Peaks: 56, Above Threshold: 56, Assigned Peaks: 35, Not assigned Peaks: 21

| Peak | Mass     | Intensity | Peak | Mass     | Intensity | Peak | Mass     | Intensity | Peak | Mass     | Intensity | Peak | Mass     | Intensity |
|------|----------|-----------|------|----------|-----------|------|----------|-----------|------|----------|-----------|------|----------|-----------|
| 1    | 58.723   | 69.896    | 4    | 62.937   | 151.217   | 3    | 71.768   | 39.262    | 4    | 82.777   | 142.971   | 5    | 92.711   | 31.979    |
| 2    | 109.733  | 449.747   | 3    | 129.723  | 81.453    | 8    | 132.642  | 77.964    | 10   | 187.733  | 102.007   | 11   | 192.630  | 94.735    |
| 13   | 139.674  | 69.506    | 14   | 144.660  | 138.384   | 15   | 174.724  | 137.300   | 16   | 222.685  | 69.449    | 17   | 228.620  | 79.333    |
| 18   | 214.691  | 82.694    | 20   | 264.679  | 592.619   | 21   | 311.630  | 3006.920  | 22   | 368.626  | 102.268   | 23   | 388.664  | 184.871   |
| 24   | 420.693  | 832.211   | 25   | 450.674  | 124.848   | 26   | 490.694  | 472.458   | 27   | 518.658  | 114.508   | 28   | 538.650  | 139.250   |
| 31   | 524.703  | 910.042   | 32   | 550.695  | 235.229   | 33   | 589.695  | 460.188   | 34   | 745.699  | 121.403   | 35   | 754.833  | 820.850   |
| 37   | 844.402  | 244.719   | 38   | 864.888  | 185.170   | 39   | 961.952  | 819.070   | 40   | 987.600  | 121.211   | 41   | 1036.000 | 194.194   |
| 42   | 1168.193 | 201.877   | 43   | 1241.185 | 170.462   | 45   | 1300.302 | 183.961   | 46   | 1338.301 | 261.130   | 47   | 1398.301 | 176.810   |
| 48   | 1426.697 | 178.507   | 50   | 1442.172 | 1188.940  | 51   | 1482.654 | 222.727   | 52   | 1484.267 | 142.701   | 53   | 1476.232 | 188.953   |
| 55   | 1488.697 | 121.056   | 59   | 1512.767 | 1360.914  |      |          |           |      |          |           |      |          |           |

Calculated Masses: VDDGCKNRR7, Carbamidomethyl (C)

| R-Yeem | Ion | a        | a-17     | a-19     | b        | b-17     | b-19     | b+18     | c        | l       | x        | y        | z        | C-Yeem | Ion |
|--------|-----|----------|----------|----------|----------|----------|----------|----------|----------|---------|----------|----------|----------|--------|-----|
| 1      | V   | 72.091   | 86.903   | 104.404  | 109.403  | 124.405  | 134.405  | 149.406  | 177.110  | 77.083  | 80.100   | 176.110  | 188.604  | 1      | 10  |
| 2      | G   | 165.182  | 180.181  | 204.404  | 209.403  | 224.405  | 234.405  | 249.406  | 277.110  | 165.188 | 168.199  | 276.110  | 288.604  | 2      | 11  |
| 3      | G   | 248.180  | 263.180  | 284.178  | 289.181  | 304.185  | 314.185  | 329.186  | 362.191  | 248.192 | 251.200  | 360.191  | 372.604  | 3      | 12  |
| 4      | G   | 292.200  | 307.201  | 324.187  | 329.203  | 344.209  | 354.209  | 369.210  | 402.214  | 292.204 | 295.213  | 400.214  | 412.604  | 4      | 13  |
| 5      | D   | 416.200  | 431.201  | 448.204  | 453.209  | 468.217  | 478.217  | 493.218  | 531.224  | 416.208 | 419.217  | 530.218  | 542.604  | 5      | 14  |
| 6      | E   | 451.211  | 466.211  | 483.211  | 488.214  | 503.221  | 513.221  | 528.222  | 561.228  | 451.215 | 454.221  | 560.222  | 572.604  | 6      | 15  |
| 7      | C'  | 701.301  | 686.301  | 685.297  | 711.303  | 718.299  | 717.292  | 748.311  | 748.310  | 133.043 | 168.200  | 842.421  | 822.384  | 7      | 16  |
| 8      | N   | 812.287  | 802.281  | 799.280  | 828.283  | 835.279  | 834.272  | 865.285  | 865.284  | 167.085 | 197.242  | 1011.464 | 1004.427 | 8      | 17  |
| 9      | I   | 820.431  | 814.430  | 812.424  | 842.428  | 841.423  | 840.419  | 870.430  | 870.429  | 86.096  | 1212.270 | 1138.091 | 1159.484 | 9      | 18  |
| 10     | D   | 1044.470 | 1037.470 | 1036.464 | 1067.472 | 1066.468 | 1065.464 | 1096.476 | 1096.475 | 177.082 | 1408.411 | 1243.517 | 1264.604 | 10     | 19  |
| 11     | E   | 1174.500 | 1167.500 | 1166.494 | 1197.496 | 1196.492 | 1195.488 | 1226.499 | 1226.498 | 167.082 | 1538.411 | 1373.517 | 1394.604 | 11     | 20  |
| 12     | H   | 1310.570 | 1303.570 | 1302.564 | 1333.566 | 1332.562 | 1331.558 | 1362.569 | 1362.568 | 135.071 | 1438.602 | 1419.610 | 1440.604 | 12     | 21  |
| 13     | R   | 1606.600 | 1600.601 | 1600.593 | 1631.595 | 1631.587 | 1631.580 | 1662.591 | 1662.590 | 133.113 | 1530.602 | 1512.604 | 1493.604 | 13     | 22  |

Copyright © 1999-2008 Bruker Daltonik GmbH

(B)

Figure S7. Annotated MS/MS spectrum of ion 1512.767 *m/z* detected in area #3. (A) MS/MS spectrum; (B) Peak list and amino acid sequence.

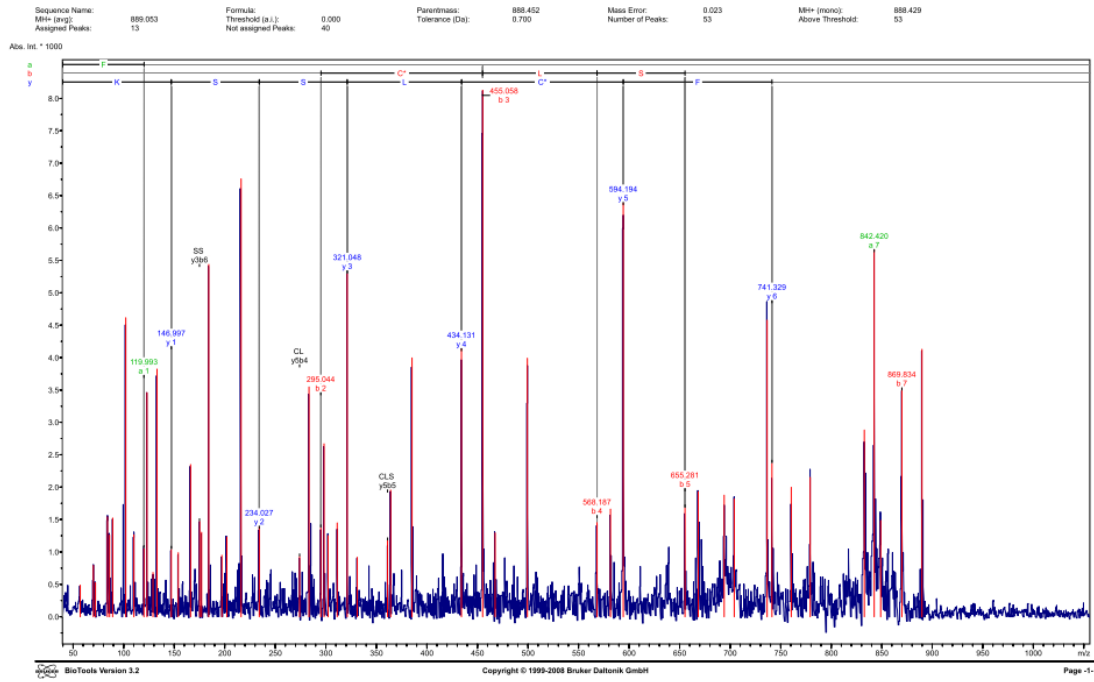

(A)

Display Parameter: Parentmass: 888.452 Mass Error: 0.023 MH+ (mono): 888.429 MH+ (avg): 889.053 Threshold (a.l.): 0.000  
 Tolerance (Da): 0.700 Number of Peaks: 53 Above Threshold: 53 Assigned Peaks: 13 Not assigned Peaks: 40

| Peak | Mass    | Intensity | Peak | Mass    | Intensity | Peak | Mass    | Intensity | Peak | Mass    | Intensity | Peak | Mass    | Intensity |
|------|---------|-----------|------|---------|-----------|------|---------|-----------|------|---------|-----------|------|---------|-----------|
| 56   | 86.200  | 486.413   | 3    | 89.042  | 15.241    | 5    | 11.990  | 327.065   | 4    | 83.912  | 154.424   | 6    | 86.000  | 1081.000  |
| 13   | 102.000 | 4610.877  | 3    | 109.872 | 126.926   | 5    | 119.990 | 1061.951  | 10   | 120.000 | 349.474   | 11   | 126.000 | 263.436   |
| 19   | 128.000 | 106.192   | 11   | 133.064 | 650.926   | 15   | 150.992 | 2459.064  | 16   | 159.044 | 1919.919  | 17   | 174.000 | 1333.920  |
| 19   | 137.000 | 848.197   | 20   | 202.025 | 1231.880  | 21   | 215.052 | 8758.944  | 22   | 234.030 | 1480.228  | 23   | 274.917 | 1011.480  |
| 25   | 250.024 | 130.223   | 26   | 265.166 | 2628.163  | 27   | 302.138 | 1926.116  | 28   | 311.224 | 1449.621  | 29   | 321.920 | 3210.152  |
| 33   | 361.024 | 1179.068  | 33   | 384.048 | 1966.261  | 33   | 385.274 | 3926.044  | 34   | 434.131 | 4140.731  | 35   | 450.000 | 8439.911  |
| 36   | 409.284 | 1077.787  | 39   | 508.184 | 1466.480  | 39   | 511.420 | 1867.111  | 40   | 566.164 | 8295.061  | 41   | 655.281 | 689.817   |
| 43   | 684.000 | 1879.440  | 43   | 925.033 | 1820.420  | 45   | 710.480 | 2577.611  | 46   | 741.329 | 2376.620  | 47   | 799.400 | 2020.854  |
| 49   | 832.711 | 2692.154  | 50   | 842.420 | 5688.910  | 51   | 868.700 | 1387.450  | 52   | 869.834 | 3536.400  | 53   | 889.053 | 4127.817  |

Calculated Masses:  
 P1-C15S8-C, Carboxymethyl (C)

| N-Term | Ion | a       | b       | y       | C-Term | Ion |
|--------|-----|---------|---------|---------|--------|-----|
| 1      | P   | 120.081 | 128.070 | 147.113 | P      | K   |
| 1      | F   | 157.101 | 165.144 | 184.183 | F      | K   |
| 3      | C+  | 427.150 | 435.173 | 521.177 | S      | S   |
| 4      | S   | 466.205 | 474.209 | 524.204 | S      | S   |
| 4      | S   | 677.205 | 685.201 | 684.204 | S      | S   |
| 5      | S   | 714.205 | 722.203 | 741.200 | S      | F   |
| 7      | K   | 842.251 | 810.211 | 810.211 | K      |     |

BioTools Version 3.2 Copyright © 1999-2008 Bruker Daltonik GmbH Page 2-

(B)

Figure S8. Annotated MS/MS spectrum of ion 888.452 *m/z* detected in area #3. (A) MS/MS spectrum; (B) Peak list and amino acid sequence.





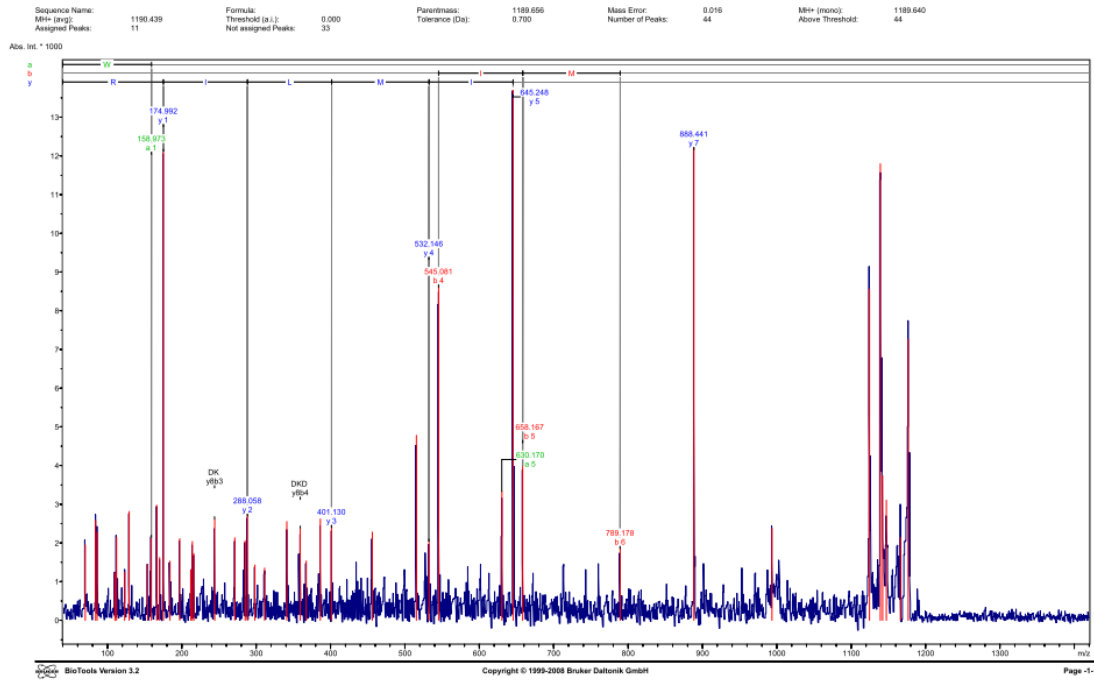

(A)

Display Parameter: Parentmass: 1189.656 Mass Error: 0.016 Mi+ (mono): 1189.640 Mi+ (avg): 1190.439 Threshold (a.i.): 0.000  
 Tolerance (Da): 0.700 Number of Peaks: 44 Above Threshold: 44 Assigned Peaks: 11 Not assigned Peaks: 33

| Peak | Mass     | Intensity | Peak | Mass     | Intensity | Peak | Mass     | Intensity | Peak | Mass     | Intensity | Peak | Mass     | Intensity |
|------|----------|-----------|------|----------|-----------|------|----------|-----------|------|----------|-----------|------|----------|-----------|
| 10   | 128.067  | 2811.318  | 1    | 131.062  | 1441.812  | 2    | 158.073  | 2138.266  | 10   | 186.071  | 2677.710  | 11   | 202.073  | 1621.452  |
| 11   | 183.069  | 3331.105  | 3    | 186.066  | 2111.681  | 4    | 219.068  | 3002.804  | 12   | 233.064  | 2033.250  | 13   | 249.066  | 1743.400  |
| 12   | 217.070  | 2138.240  | 20   | 288.059  | 2005.480  | 21   | 288.059  | 2748.330  | 22   | 288.051  | 1431.430  | 23   | 311.067  | 1382.430  |
| 20   | 332.074  | 2029.571  | 28   | 361.074  | 1536.131  | 24   | 330.070  | 2618.358  | 25   | 401.074  | 2253.251  | 26   | 425.070  | 2202.430  |
| 33   | 532.124  | 3032.650  | 33   | 545.081  | 8669.033  | 33   | 550.130  | 3330.533  | 34   | 645.245  | 1950.430  | 35   | 658.187  | 5683.054  |
| 34   | 686.441  | 12419.881 | 38   | 692.388  | 2211.680  | 36   | 1124.241 | 3369.140  | 38   | 1189.656 | 11298.400 | 41   | 1189.121 | 3749.304  |
| 43   | 1189.125 | 2148.961  | 44   | 1176.560 | 7383.730  |      |          |           |      |          |           |      |          |           |

Calculated Masses:  
 WQWDRMLR

| Mi.Term | Ion | a        | b        | y        | C.Term | Ion |
|---------|-----|----------|----------|----------|--------|-----|
| 1       | W   | 159.092  | 197.057  | 178.111  |        |     |
| 2       | D   | 278.110  | 302.113  | 288.203  | S      | L   |
| 3       | R   | 402.211  | 430.204  | 401.207  |        |     |
| 4       | D   | 617.241  | 645.233  | 632.238  |        |     |
| 5       | L   | 636.262  | 658.253  | 654.251  |        |     |
| 6       | M   | 751.262  | 789.259  | 752.252  | L      | D   |
| 7       | L   | 874.441  | 874.441  | 884.443  |        |     |
| 8       | L   | 887.433  | 1016.428 | 1033.560 |        |     |
| 9       | R   | 1141.634 | 1171.620 | 1189.620 |        |     |

Copyright © 1999-2008 Bruker Daltonik GmbH

(B)

Figure S10. Annotated MS/MS spectrum of ion 1189.656 m/z detected in area #4. (A) MS/MS spectrum; (B) Peak list and amino acid sequence.







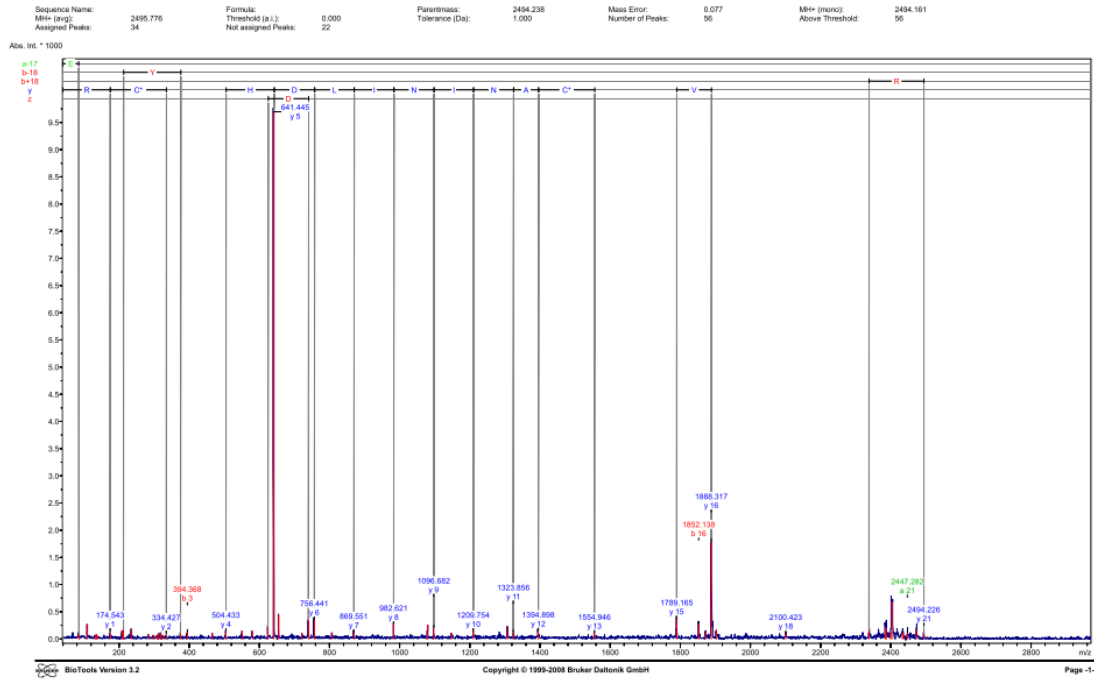

(A)

Display Parameter:   
 Parentmass: 2494.238   
 Tolerance (Da): 1.000   
 Mass Error: 0.077   
 Number of Peaks: 56   
 MH+ (mono): 2494.161   
 Above Threshold: 56   
 MH+ (avg): 2495.776   
 Assigned Peaks: 34   
 Threshold (a.i.): 0.000   
 Not assigned Peaks: 22

| Peak | Mass     | Intensity | Peak | Mass     | Intensity | Peak | Mass     | Intensity | Peak | Mass     | Intensity | Peak | Mass     | Intensity |
|------|----------|-----------|------|----------|-----------|------|----------|-----------|------|----------|-----------|------|----------|-----------|
| 85   | 201      | 85        | 201  | 85       | 201       | 85   | 201      | 85        | 201  | 85       | 201       | 85   | 201      | 85        |
| 11   | 174.543  | 1.115     | 11   | 174.543  | 1.115     | 11   | 174.543  | 1.115     | 11   | 174.543  | 1.115     | 11   | 174.543  | 1.115     |
| 13   | 304.368  | 0.146     | 13   | 304.368  | 0.146     | 13   | 304.368  | 0.146     | 13   | 304.368  | 0.146     | 13   | 304.368  | 0.146     |
| 15   | 334.427  | 0.050     | 15   | 334.427  | 0.050     | 15   | 334.427  | 0.050     | 15   | 334.427  | 0.050     | 15   | 334.427  | 0.050     |
| 23   | 504.433  | 0.050     | 23   | 504.433  | 0.050     | 23   | 504.433  | 0.050     | 23   | 504.433  | 0.050     | 23   | 504.433  | 0.050     |
| 33   | 541.445  | 952.294   | 33   | 541.445  | 952.294   | 33   | 541.445  | 952.294   | 33   | 541.445  | 952.294   | 33   | 541.445  | 952.294   |
| 34   | 571.400  | 0.050     | 34   | 571.400  | 0.050     | 34   | 571.400  | 0.050     | 34   | 571.400  | 0.050     | 34   | 571.400  | 0.050     |
| 43   | 750.441  | 0.050     | 43   | 750.441  | 0.050     | 43   | 750.441  | 0.050     | 43   | 750.441  | 0.050     | 43   | 750.441  | 0.050     |
| 49   | 869.551  | 0.050     | 49   | 869.551  | 0.050     | 49   | 869.551  | 0.050     | 49   | 869.551  | 0.050     | 49   | 869.551  | 0.050     |
| 59   | 1096.652 | 0.050     | 59   | 1096.652 | 0.050     | 59   | 1096.652 | 0.050     | 59   | 1096.652 | 0.050     | 59   | 1096.652 | 0.050     |
| 69   | 1206.754 | 0.050     | 69   | 1206.754 | 0.050     | 69   | 1206.754 | 0.050     | 69   | 1206.754 | 0.050     | 69   | 1206.754 | 0.050     |
| 79   | 1323.856 | 0.050     | 79   | 1323.856 | 0.050     | 79   | 1323.856 | 0.050     | 79   | 1323.856 | 0.050     | 79   | 1323.856 | 0.050     |
| 89   | 1394.898 | 0.050     | 89   | 1394.898 | 0.050     | 89   | 1394.898 | 0.050     | 89   | 1394.898 | 0.050     | 89   | 1394.898 | 0.050     |
| 99   | 1554.946 | 0.050     | 99   | 1554.946 | 0.050     | 99   | 1554.946 | 0.050     | 99   | 1554.946 | 0.050     | 99   | 1554.946 | 0.050     |
| 109  | 1789.165 | 0.050     | 109  | 1789.165 | 0.050     | 109  | 1789.165 | 0.050     | 109  | 1789.165 | 0.050     | 109  | 1789.165 | 0.050     |
| 119  | 1866.317 | 0.050     | 119  | 1866.317 | 0.050     | 119  | 1866.317 | 0.050     | 119  | 1866.317 | 0.050     | 119  | 1866.317 | 0.050     |
| 129  | 1952.138 | 0.050     | 129  | 1952.138 | 0.050     | 129  | 1952.138 | 0.050     | 129  | 1952.138 | 0.050     | 129  | 1952.138 | 0.050     |
| 139  | 2100.423 | 0.050     | 139  | 2100.423 | 0.050     | 139  | 2100.423 | 0.050     | 139  | 2100.423 | 0.050     | 139  | 2100.423 | 0.050     |
| 149  | 2447.232 | 0.050     | 149  | 2447.232 | 0.050     | 149  | 2447.232 | 0.050     | 149  | 2447.232 | 0.050     | 149  | 2447.232 | 0.050     |
| 159  | 2494.238 | 0.050     | 159  | 2494.238 | 0.050     | 159  | 2494.238 | 0.050     | 159  | 2494.238 | 0.050     | 159  | 2494.238 | 0.050     |
| 169  | 2494.238 | 952.294   | 169  | 2494.238 | 952.294   | 169  | 2494.238 | 952.294   | 169  | 2494.238 | 952.294   | 169  | 2494.238 | 952.294   |

Calculated Masses:   
 EYFDVPHCANLLDHAVCR: Carbamidothiyl (C) 20: Carbamidothiyl (C)

| N-Term | Ion | a        | a-17    | a-18    | b        | b-17     | b-18     | b+18     | c        | c        | f        | f        | f   | C-Term | Ion |
|--------|-----|----------|---------|---------|----------|----------|----------|----------|----------|----------|----------|----------|-----|--------|-----|
| 1      | F   | 102.050  | 18.000  | 18.000  | 133.050  | 117.050  | 149.050  | 147.070  | 192.050  | 191.000  | 171.119  | 191.062  | 21  | F      |     |
| 2      | F   | 204.100  | 36.000  | 36.000  | 266.100  | 234.100  | 298.100  | 296.140  | 384.100  | 381.100  | 332.100  | 318.121  | 40  | F      |     |
| 3      | F   | 306.150  | 54.000  | 54.000  | 399.150  | 348.150  | 447.150  | 445.180  | 576.150  | 573.150  | 498.119  | 474.179  | 59  | F      |     |
| 4      | F   | 408.200  | 72.000  | 72.000  | 532.200  | 456.200  | 594.200  | 592.220  | 768.200  | 765.200  | 664.139  | 630.229  | 68  | F      |     |
| 5      | F   | 510.250  | 90.000  | 90.000  | 665.250  | 570.250  | 744.250  | 742.260  | 972.250  | 969.250  | 832.159  | 788.259  | 77  | F      |     |
| 6      | F   | 612.300  | 108.000 | 108.000 | 798.300  | 684.300  | 887.300  | 885.310  | 1188.300 | 1185.300 | 1016.179 | 962.279  | 86  | F      |     |
| 7      | F   | 714.350  | 126.000 | 126.000 | 931.350  | 798.350  | 1090.350 | 1088.360 | 1440.350 | 1437.350 | 1240.199 | 1178.299 | 95  | F      |     |
| 8      | F   | 816.400  | 144.000 | 144.000 | 1064.400 | 912.400  | 1281.400 | 1279.410 | 1728.400 | 1725.400 | 1472.219 | 1400.319 | 104 | F      |     |
| 9      | F   | 918.450  | 162.000 | 162.000 | 1197.450 | 1026.450 | 1458.450 | 1456.460 | 1944.450 | 1941.450 | 1684.239 | 1602.339 | 113 | F      |     |
| 10     | F   | 1020.500 | 180.000 | 180.000 | 1330.500 | 1140.500 | 1746.500 | 1744.510 | 2304.500 | 2301.500 | 1968.259 | 1876.359 | 122 | F      |     |
| 11     | F   | 1122.550 | 198.000 | 198.000 | 1463.550 | 1254.550 | 1983.550 | 1981.560 | 2640.550 | 2637.550 | 2224.279 | 2122.379 | 131 | F      |     |
| 12     | F   | 1224.600 | 216.000 | 216.000 | 1596.600 | 1362.600 | 2211.600 | 2209.610 | 2928.600 | 2925.600 | 2448.299 | 2336.399 | 140 | F      |     |
| 13     | F   | 1326.650 | 234.000 | 234.000 | 1729.650 | 1491.650 | 2440.650 | 2438.660 | 3216.650 | 3213.650 | 2696.319 | 2574.419 | 149 | F      |     |
| 14     | F   | 1428.700 | 252.000 | 252.000 | 1862.700 | 1620.700 | 2669.700 | 2667.710 | 3504.700 | 3501.700 | 2954.339 | 2822.439 | 158 | F      |     |
| 15     | F   | 1530.750 | 270.000 | 270.000 | 1995.750 | 1749.750 | 2900.750 | 2898.760 | 3800.750 | 3797.750 | 3212.359 | 3080.459 | 167 | F      |     |
| 16     | F   | 1632.800 | 288.000 | 288.000 | 2128.800 | 1878.800 | 3130.800 | 3128.810 | 4090.800 | 4087.800 | 3470.379 | 3338.479 | 176 | F      |     |
| 17     | F   | 1734.850 | 306.000 | 306.000 | 2261.850 | 2007.850 | 3360.850 | 3358.860 | 4380.850 | 4377.850 | 3728.399 | 3586.499 | 185 | F      |     |
| 18     | F   | 1836.900 | 324.000 | 324.000 | 2394.900 | 2136.900 | 3590.900 | 3588.910 | 4670.900 | 4667.900 | 3986.419 | 3834.519 | 194 | F      |     |
| 19     | F   | 1938.950 | 342.000 | 342.000 | 2527.950 | 2265.950 | 3820.950 | 3818.960 | 4960.950 | 4957.950 | 4244.439 | 4082.539 | 203 | F      |     |
| 20     | F   | 2041.000 | 360.000 | 360.000 | 2660.000 | 2395.000 | 4050.000 | 4048.010 | 5250.000 | 5247.000 | 4502.459 | 4328.559 | 212 | F      |     |
| 21     | F   | 2143.050 | 378.000 | 378.000 | 2793.050 | 2524.050 | 4280.050 | 4278.060 | 5540.050 | 5537.050 | 4760.479 | 4564.579 | 221 | F      |     |
| 22     | F   | 2245.100 | 396.000 | 396.000 | 2926.100 | 2653.100 | 4510.100 | 4508.110 | 5830.100 | 5827.100 | 5018.499 | 4802.599 | 230 | F      |     |

BioTools Version 3.2 Copyright © 1999-2008 Bruker Daltonik GmbH Page -2-

(B)

Figure S14. Annotated MS/MS spectrum of ion 2494.238 m/z detected in area #4. (A) MS/MS spectrum; (B) Peak list and amino acid sequence.

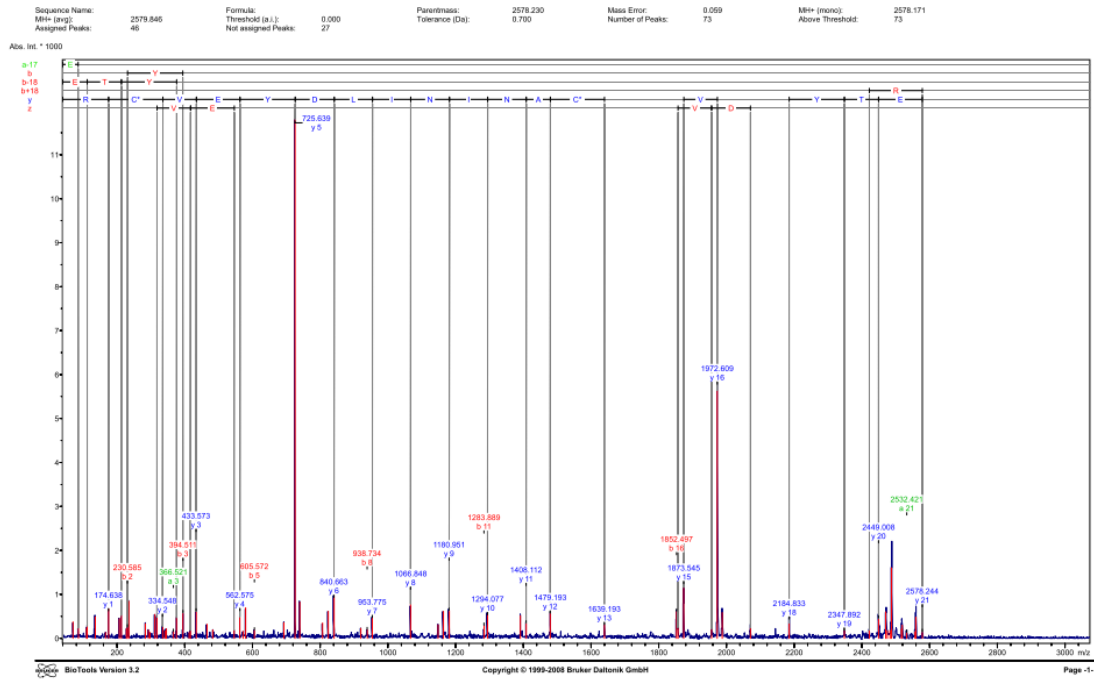

(A)

Display Parameter:  
 Parentmass: 2578.230  
 Tolerance (Da): 0.700  
 Mass Error: 0.059  
 Number of Peaks: 73  
 Mi+ (mono): 2578.171  
 Above Threshold: 73  
 Mi+ (avg): 2578.846  
 Assigned Peaks: 46  
 Threshold (a.i.): 0.000  
 Not assigned Peaks: 27

| Peak | Mass | Intensity | Peak | Mass | Intensity | Peak | Mass | Intensity | Peak | Mass | Intensity | Peak | Mass | Intensity |
|------|------|-----------|------|------|-----------|------|------|-----------|------|------|-----------|------|------|-----------|
| 69   | 700  | 374.040   | 69   | 829  | 231.614   | 69   | 958  | 230.031   | 69   | 1117 | 229.548   | 69   | 1266 | 185.984   |
| 70   | 714  | 632       | 70   | 843  | 206.252   | 70   | 972  | 205.050   | 70   | 1131 | 204.010   | 70   | 1280 | 162.000   |
| 71   | 728  | 1133      | 71   | 857  | 202.436   | 71   | 996  | 191.000   | 71   | 1155 | 190.000   | 71   | 1304 | 154.400   |
| 72   | 742  | 341       | 72   | 871  | 181.595   | 72   | 1010 | 170.000   | 72   | 1169 | 169.000   | 72   | 1318 | 146.800   |
| 73   | 756  | 297       | 73   | 885  | 167.810   | 73   | 1024 | 156.000   | 73   | 1183 | 155.000   | 73   | 1332 | 139.200   |
| 74   | 770  | 253       | 74   | 909  | 154.025   | 74   | 1038 | 142.000   | 74   | 1197 | 141.000   | 74   | 1346 | 131.600   |
| 75   | 784  | 209       | 75   | 923  | 140.240   | 75   | 1052 | 128.000   | 75   | 1211 | 127.000   | 75   | 1360 | 124.000   |
| 76   | 798  | 165       | 76   | 937  | 126.455   | 76   | 1066 | 114.000   | 76   | 1225 | 113.000   | 76   | 1374 | 116.400   |
| 77   | 812  | 121       | 77   | 951  | 112.670   | 77   | 1080 | 100.000   | 77   | 1239 | 99.000    | 77   | 1388 | 108.800   |
| 78   | 826  | 77        | 78   | 965  | 98.885    | 78   | 1094 | 86.000    | 78   | 1253 | 85.000    | 78   | 1402 | 102.200   |
| 79   | 840  | 33        | 79   | 979  | 85.100    | 79   | 1108 | 72.000    | 79   | 1267 | 71.000    | 79   | 1416 | 94.600    |
| 80   | 854  | 19        | 80   | 993  | 71.315    | 80   | 1122 | 58.000    | 80   | 1281 | 57.000    | 80   | 1430 | 87.000    |
| 81   | 868  | 5         | 81   | 1007 | 57.530    | 81   | 1136 | 44.000    | 81   | 1295 | 43.000    | 81   | 1444 | 79.400    |
| 82   | 882  | 1         | 82   | 1021 | 43.745    | 82   | 1150 | 30.000    | 82   | 1309 | 29.000    | 82   | 1458 | 71.800    |
| 83   | 896  | 0         | 83   | 1035 | 29.960    | 83   | 1164 | 16.000    | 83   | 1323 | 15.000    | 83   | 1472 | 64.200    |
| 84   | 910  | 0         | 84   | 1049 | 16.175    | 84   | 1178 | 2.000     | 84   | 1337 | 1.000     | 84   | 1486 | 56.600    |
| 85   | 924  | 0         | 85   | 1063 | 1.390     | 85   | 1192 | 0.000     | 85   | 1351 | 0.000     | 85   | 1500 | 49.000    |
| 86   | 938  | 0         | 86   | 1077 | 0.705     | 86   | 1206 | 0.000     | 86   | 1365 | 0.000     | 86   | 1514 | 41.400    |
| 87   | 952  | 0         | 87   | 1091 | 0.020     | 87   | 1220 | 0.000     | 87   | 1379 | 0.000     | 87   | 1528 | 33.800    |
| 88   | 966  | 0         | 88   | 1105 | 0.000     | 88   | 1234 | 0.000     | 88   | 1393 | 0.000     | 88   | 1542 | 26.200    |
| 89   | 980  | 0         | 89   | 1119 | 0.000     | 89   | 1248 | 0.000     | 89   | 1407 | 0.000     | 89   | 1556 | 18.600    |
| 90   | 994  | 0         | 90   | 1133 | 0.000     | 90   | 1262 | 0.000     | 90   | 1421 | 0.000     | 90   | 1570 | 11.000    |
| 91   | 1008 | 0         | 91   | 1147 | 0.000     | 91   | 1276 | 0.000     | 91   | 1435 | 0.000     | 91   | 1584 | 3.400     |
| 92   | 1022 | 0         | 92   | 1161 | 0.000     | 92   | 1290 | 0.000     | 92   | 1449 | 0.000     | 92   | 1598 | 0.000     |
| 93   | 1036 | 0         | 93   | 1175 | 0.000     | 93   | 1304 | 0.000     | 93   | 1463 | 0.000     | 93   | 1612 | 0.000     |
| 94   | 1050 | 0         | 94   | 1189 | 0.000     | 94   | 1318 | 0.000     | 94   | 1477 | 0.000     | 94   | 1626 | 0.000     |
| 95   | 1064 | 0         | 95   | 1203 | 0.000     | 95   | 1332 | 0.000     | 95   | 1491 | 0.000     | 95   | 1640 | 0.000     |
| 96   | 1078 | 0         | 96   | 1217 | 0.000     | 96   | 1346 | 0.000     | 96   | 1505 | 0.000     | 96   | 1654 | 0.000     |
| 97   | 1092 | 0         | 97   | 1231 | 0.000     | 97   | 1360 | 0.000     | 97   | 1519 | 0.000     | 97   | 1668 | 0.000     |
| 98   | 1106 | 0         | 98   | 1245 | 0.000     | 98   | 1374 | 0.000     | 98   | 1533 | 0.000     | 98   | 1682 | 0.000     |
| 99   | 1120 | 0         | 99   | 1259 | 0.000     | 99   | 1388 | 0.000     | 99   | 1547 | 0.000     | 99   | 1696 | 0.000     |
| 100  | 1134 | 0         | 100  | 1273 | 0.000     | 100  | 1402 | 0.000     | 100  | 1561 | 0.000     | 100  | 1710 | 0.000     |
| 101  | 1148 | 0         | 101  | 1287 | 0.000     | 101  | 1416 | 0.000     | 101  | 1575 | 0.000     | 101  | 1724 | 0.000     |
| 102  | 1162 | 0         | 102  | 1301 | 0.000     | 102  | 1430 | 0.000     | 102  | 1589 | 0.000     | 102  | 1738 | 0.000     |
| 103  | 1176 | 0         | 103  | 1315 | 0.000     | 103  | 1444 | 0.000     | 103  | 1603 | 0.000     | 103  | 1752 | 0.000     |
| 104  | 1190 | 0         | 104  | 1329 | 0.000     | 104  | 1458 | 0.000     | 104  | 1617 | 0.000     | 104  | 1766 | 0.000     |
| 105  | 1204 | 0         | 105  | 1343 | 0.000     | 105  | 1472 | 0.000     | 105  | 1631 | 0.000     | 105  | 1780 | 0.000     |
| 106  | 1218 | 0         | 106  | 1357 | 0.000     | 106  | 1486 | 0.000     | 106  | 1645 | 0.000     | 106  | 1794 | 0.000     |
| 107  | 1232 | 0         | 107  | 1371 | 0.000     | 107  | 1500 | 0.000     | 107  | 1659 | 0.000     | 107  | 1808 | 0.000     |
| 108  | 1246 | 0         | 108  | 1385 | 0.000     | 108  | 1514 | 0.000     | 108  | 1673 | 0.000     | 108  | 1822 | 0.000     |
| 109  | 1260 | 0         | 109  | 1399 | 0.000     | 109  | 1528 | 0.000     | 109  | 1687 | 0.000     | 109  | 1836 | 0.000     |
| 110  | 1274 | 0         | 110  | 1413 | 0.000     | 110  | 1542 | 0.000     | 110  | 1701 | 0.000     | 110  | 1850 | 0.000     |
| 111  | 1288 | 0         | 111  | 1427 | 0.000     | 111  | 1556 | 0.000     | 111  | 1715 | 0.000     | 111  | 1864 | 0.000     |
| 112  | 1302 | 0         | 112  | 1441 | 0.000     | 112  | 1570 | 0.000     | 112  | 1729 | 0.000     | 112  | 1878 | 0.000     |
| 113  | 1316 | 0         | 113  | 1455 | 0.000     | 113  | 1584 | 0.000     | 113  | 1743 | 0.000     | 113  | 1892 | 0.000     |
| 114  | 1330 | 0         | 114  | 1469 | 0.000     | 114  | 1598 | 0.000     | 114  | 1757 | 0.000     | 114  | 1906 | 0.000     |
| 115  | 1344 | 0         | 115  | 1483 | 0.000     | 115  | 1612 | 0.000     | 115  | 1771 | 0.000     | 115  | 1920 | 0.000     |
| 116  | 1358 | 0         | 116  | 1497 | 0.000     | 116  | 1626 | 0.000     | 116  | 1785 | 0.000     | 116  | 1934 | 0.000     |
| 117  | 1372 | 0         | 117  | 1511 | 0.000     | 117  | 1640 | 0.000     | 117  | 1799 | 0.000     | 117  | 1948 | 0.000     |
| 118  | 1386 | 0         | 118  | 1525 | 0.000     | 118  | 1654 | 0.000     | 118  | 1813 | 0.000     | 118  | 1962 | 0.000     |
| 119  | 1400 | 0         | 119  | 1539 | 0.000     | 119  | 1668 | 0.000     | 119  | 1827 | 0.000     | 119  | 1976 | 0.000     |
| 120  | 1414 | 0         | 120  | 1553 | 0.000     | 120  | 1682 | 0.000     | 120  | 1841 | 0.000     | 120  | 1990 | 0.000     |
| 121  | 1428 | 0         | 121  | 1567 | 0.000     | 121  | 1696 | 0.000     | 121  | 1855 | 0.000     | 121  | 2004 | 0.000     |
| 122  | 1442 | 0         | 122  | 1581 | 0.000     | 122  | 1710 | 0.000     | 122  | 1869 | 0.000     | 122  | 2018 | 0.000     |
| 123  | 1456 | 0         | 123  | 1595 | 0.000     | 123  | 1724 | 0.000     | 123  | 1883 | 0.000     | 123  | 2032 | 0.000     |
| 124  | 1470 | 0         | 124  | 1609 | 0.000     | 124  | 1738 | 0.000     | 124  | 1897 | 0.000     | 124  | 2046 | 0.000     |
| 125  | 1484 | 0         | 125  | 1623 | 0.000     | 125  | 1752 | 0.000     | 125  | 1911 | 0.000     | 125  | 2060 | 0.000     |
| 126  | 1498 | 0         | 126  | 1637 | 0.000     | 126  | 1766 | 0.000     | 126  | 1925 | 0.000     | 126  | 2074 | 0.000     |
| 127  | 1512 | 0         | 127  | 1651 | 0.000     | 127  | 1780 | 0.000     | 127  | 1939 | 0.000     | 127  | 2088 | 0.000     |
| 128  | 1526 | 0         | 128  | 1665 | 0.000     | 128  | 1794 | 0.000     | 128  | 1953 | 0.000     | 128  | 2102 | 0.000     |
| 129  | 1540 | 0         | 129  | 1679 | 0.000     | 129  | 1808 | 0.000     | 129  | 1967 | 0.000     | 129  | 2116 | 0.000     |
| 130  | 1554 | 0         | 130  | 1693 | 0.000     | 130  | 1822 | 0.000     | 130  | 1981 | 0.000     | 130  | 2130 | 0.000     |
| 131  | 1568 | 0         | 131  | 1707 | 0.000     | 131  | 1836 | 0.000     | 131  | 1995 | 0.000     | 131  | 2144 | 0.000     |
| 132  | 1582 | 0         | 132  | 1721 | 0.000     | 132  | 1850 | 0.000     | 132  | 2009 | 0.000     | 132  | 2158 | 0.000     |
| 133  | 1596 | 0         | 133  | 1735 | 0.000     | 133  | 1864 | 0.000     | 133  | 2023 | 0.000     | 133  | 2172 | 0.000     |
| 134  | 1610 | 0         | 134  | 1749 | 0.000     | 134  | 1878 | 0.000     | 134  | 2037 | 0.000     | 134  | 2186 | 0.000     |
| 135  | 1624 | 0         | 135  | 1763 | 0.000     | 135  | 1892 | 0.000     | 135  | 2051 | 0.000     | 135  | 2200 | 0.000     |
| 136  | 1638 | 0         | 136  | 1777 | 0.000     | 136  | 1906 | 0.000     | 136  | 2065 | 0.000     | 136  | 2214 | 0.000     |
| 137  | 1652 | 0         | 137  | 1791 | 0.000     | 137  | 1920 | 0.000     | 137  | 2079 | 0.000     | 137  | 2228 | 0.000     |
| 138  | 1666 | 0         | 138  | 1805 | 0.000     | 138  | 1934 | 0.000     | 138  | 2093 | 0.000     | 138  | 2242 | 0.000     |
| 139  | 1680 | 0         | 139  | 1819 | 0.000     | 139  | 1948 | 0.000     | 139  | 2107 | 0.000     | 139  | 2256 | 0.000     |
| 140  | 1694 | 0         | 140  | 1833 | 0.000     | 140  | 1962 | 0.000     | 140  | 2121 | 0.000     | 140  | 2270 | 0.000     |
| 141  | 1708 | 0         | 141  | 1847 | 0.000     | 141  | 1976 | 0.000     | 141  | 2135 | 0.000     | 141  | 2284 | 0.000     |
| 142  | 1722 | 0         | 142  | 1861 | 0.000     | 142  | 1990 | 0.000     | 142  | 2149 | 0.000     | 142  | 2298 | 0.000     |
| 143  | 1736 | 0         | 143  | 1875 | 0.000     | 143  | 2004 | 0.000     | 143  | 2163 | 0.000     | 143  | 2312 | 0.000     |
| 144  | 1750 | 0         | 144  | 1889 | 0.000     | 144  | 2018 | 0.000     | 144  | 2177 | 0.000     | 144  | 2326 | 0.000     |
| 145  | 1764 | 0         | 145  | 1903 | 0.000     | 145  | 2032 | 0.000     | 145  | 2191 | 0.000     | 145  | 2340 | 0.000     |
| 146  | 1778 | 0         | 146  | 1917 | 0.000     | 146  | 2046 | 0.000     | 146  | 2205 | 0.000     | 146  | 2354 | 0.000     |
| 147  | 1792 | 0         | 147  | 1931 | 0.000     | 147  | 2060 | 0.000     | 147  | 2219 | 0.000     | 147  | 2368 | 0.000     |
| 148  | 1806 | 0         | 148  | 1945 | 0.000     | 148  | 2074 | 0.000     | 148  | 2233 | 0.000     | 148  | 2382 | 0.000     |
| 149  | 1820 | 0         | 149  | 1959 | 0.000     | 149  | 2088 | 0.000     | 149  | 2247 | 0.000     | 149  | 2396 | 0.000     |
| 150  | 1834 | 0         | 150  | 1973 | 0.000     | 150  | 2102 | 0.000     | 150  | 2261 | 0.000     | 150  | 2410 | 0.000     |
| 151  | 1848 | 0         | 151  | 1987 | 0.000     | 151  | 2116 | 0.000     | 151  | 2275 | 0.000     | 151  | 2424 | 0.000     |
| 152  | 1862 | 0         | 152  | 2001 | 0.000     | 152  | 2130 | 0.000     | 152  | 2289 | 0.000     | 152  | 2438 | 0.000     |
| 153  | 1876 | 0         | 153  | 2015 | 0.000     | 153  | 2144 | 0.000     | 153  | 2303 | 0.000     | 153  | 2452 | 0.000     |
| 154  | 1890 | 0         | 154  | 2029 | 0.000     |      |      |           |      |      |           |      |      |           |





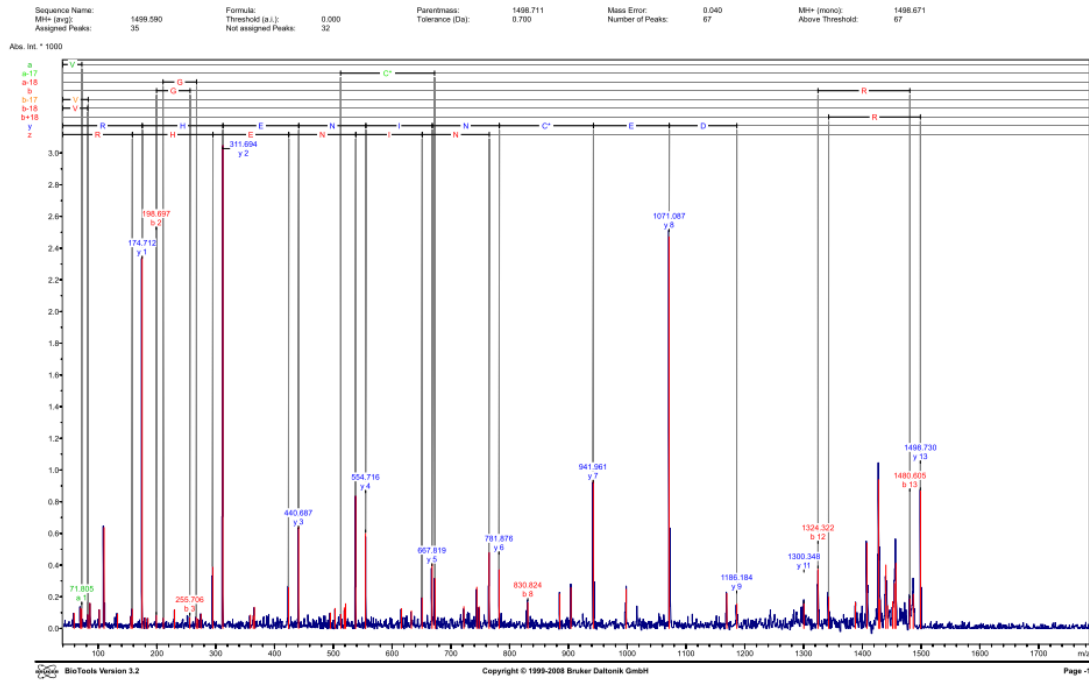

(A)

Display Parameter: Parentmass: 1498.711 Mass Error: 0.040 MH+ (mono): 1498.671 MH+ (avg): 1499.590 Threshold (a.i.): 0.000  
 Tolerance (Da): 0.700 Number of Peaks: 67 Above Threshold: 67

| Peak | Mass     | Intensity | Peak | Mass     | Intensity | Peak | Mass     | Intensity | Peak   | Mass     | Intensity | Peak    | Mass     | Intensity |
|------|----------|-----------|------|----------|-----------|------|----------|-----------|--------|----------|-----------|---------|----------|-----------|
| 1    | 58.812   | 0.056     | 2    | 69.767   | 0.031     | 3    | 119.055  | 1         | 82.311 | 0.899    | 4         | 101.180 | 119.462  |           |
| 4    | 109.743  | 0.082     | 5    | 132.727  | 0.050     | 6    | 155.581  | 25.012    | 10     | 187.950  | 127.500   | 11      | 172.730  | 240.312   |
| 12   | 184.660  | 0.399     | 13   | 199.091  | 0.159     | 14   | 213.582  | 69.113    | 16     | 229.029  | 117.693   | 17      | 255.724  | 77.461    |
| 18   | 289.875  | 37.873    | 20   | 274.600  | 30.762    | 21   | 288.883  | 392.730   | 22     | 311.594  | 3081.575  | 23      | 338.840  | 81.954    |
| 25   | 350.604  | 133.442   | 26   | 347.655  | 259.178   | 27   | 400.977  | 140.749   | 28     | 424.705  | 67.430    | 29      | 370.702  | 170.930   |
| 31   | 318.930  | 130.010   | 32   | 325.877  | 165.200   | 33   | 337.801  | 840.743   | 34     | 364.745  | 650.420   | 35      | 411.750  | 124.930   |
| 36   | 650.495  | 109.326   | 37   | 669.816  | 609.180   | 38   | 612.833  | 118.874   | 39     | 347.851  | 167.594   | 41      | 618.864  | 280.350   |
| 43   | 764.824  | 481.483   | 44   | 781.820  | 317.458   | 45   | 530.843  | 163.807   | 46     | 584.950  | 217.633   | 47      | 631.920  | 297.446   |
| 48   | 668.669  | 264.824   | 49   | 107.084  | 4412.084  | 51   | 1189.184 | 229.555   | 52     | 1186.184 | 164.060   | 53      | 1207.489 | 157.650   |
| 54   | 1159.401 | 202.574   | 55   | 1387.987 | 84.180    | 57   | 1289.577 | 538.735   | 58     | 1429.981 | 930.000   | 59      | 1249.820 | 181.416   |
| 61   | 1482.850 | 181.980   | 62   | 1451.784 | 180.531   | 63   | 1462.780 | 284.760   | 64     | 1458.953 | 411.430   | 65      | 1486.000 | 189.430   |
| 67   | 1498.711 | 871.397   |      |          |           |      |          |           |        |          |           |         |          |           |

Calculated Masses: VGGDECNNEHR7: Carbamatoethyl (C)

| IC-Term | len | a        | a-17     | a-18     | b        | b-17     | b-18     | b+18     | c        | y       | z        | z        | z        | C-Term | len |
|---------|-----|----------|----------|----------|----------|----------|----------|----------|----------|---------|----------|----------|----------|--------|-----|
| 1       | 7   | 72.881   | 153.093  | 154.103  | 703.912  | 83.449   | 84.965   | 148.598  | 171.100  | 72.081  | 701.998  | 175.119  | 186.692  | 7      | 18  |
| 2       | 7   | 171.181  | 151.921  | 153.103  | 199.144  | 182.118  | 181.183  | 217.155  | 216.171  | 72.081  | 538.197  | 312.178  | 285.181  | 7      | 18  |
| 3       | 7   | 228.174  | 211.141  | 218.160  | 386.180  | 230.100  | 229.105  | 274.176  | 273.102  | 30.102  | 487.200  | 441.200  | 442.184  | 13     | 18  |
| 4       | 7   | 285.166  | 268.151  | 267.161  | 519.189  | 266.100  | 265.195  | 351.169  | 350.211  | 30.102  | 611.243  | 555.243  | 556.227  | 13     | 18  |
| 5       | 7   | 300.210  | 303.211  | 302.203  | 428.214  | 411.180  | 410.202  | 448.220  | 447.241  | 68.093  | 684.292  | 648.292  | 651.321  | 8      | 18  |
| 6       | 7   | 350.260  | 313.231  | 311.251  | 269.214  | 440.220  | 336.265  | 335.265  | 334.261  | 182.093 | 608.290  | 742.290  | 745.364  | 8      | 18  |
| 7       | 7   | 400.260  | 472.260  | 471.262  | 277.260  | 700.261  | 669.277  | 739.260  | 734.310  | 133.043 | 668.200  | 842.242  | 845.384  | 7      | 18  |
| 8       | 7   | 450.310  | 728.309  | 728.303  | 311.310  | 814.304  | 813.309  | 849.341  | 848.321  | 87.093  | 109.443  | 1271.464 | 1274.517 | 6      | 18  |
| 9       | 7   | 518.410  | 699.301  | 698.299  | 444.214  | 897.389  | 826.494  | 924.423  | 921.441  | 86.098  | 1412.290 | 1186.491 | 1189.464 | 6      | 18  |
| 10      | 7   | 678.506  | 1174.338 | 1174.334 | 1097.478 | 1041.411 | 1040.474 | 1076.456 | 1076.456 | 87.093  | 1669.411 | 1433.474 | 1436.498 | 6      | 18  |
| 11      | 7   | 1109.426 | 1749.470 | 1749.464 | 1197.200 | 1170.414 | 1169.480 | 1205.410 | 1204.520 | 102.095 | 1506.211 | 1300.433 | 1283.507 | 6      | 18  |
| 12      | 7   | 1286.856 | 1749.470 | 1749.464 | 1244.200 | 1207.200 | 1206.248 | 1244.260 | 1244.260 | 118.017 | 1420.260 | 1209.602 | 1282.674 | 2      | 18  |
| 13      | 7   | 1286.856 | 1244.261 | 1244.261 | 1480.602 | 1463.613 | 1462.625 | 1498.616 | 1497.621 | 134.111 | 1542.602 | 1488.616 | 1511.621 | 1      | 18  |

BioTools Version 3.2 Copyright © 1999-2008 Bruker Daltonik GmbH Page -2-

(B)

Figure S17. Annotated MS/MS spectrum of ion 1498.711 m/z detected in area #5. (A) MS/MS spectrum; (B) Peak list and amino acid sequence.

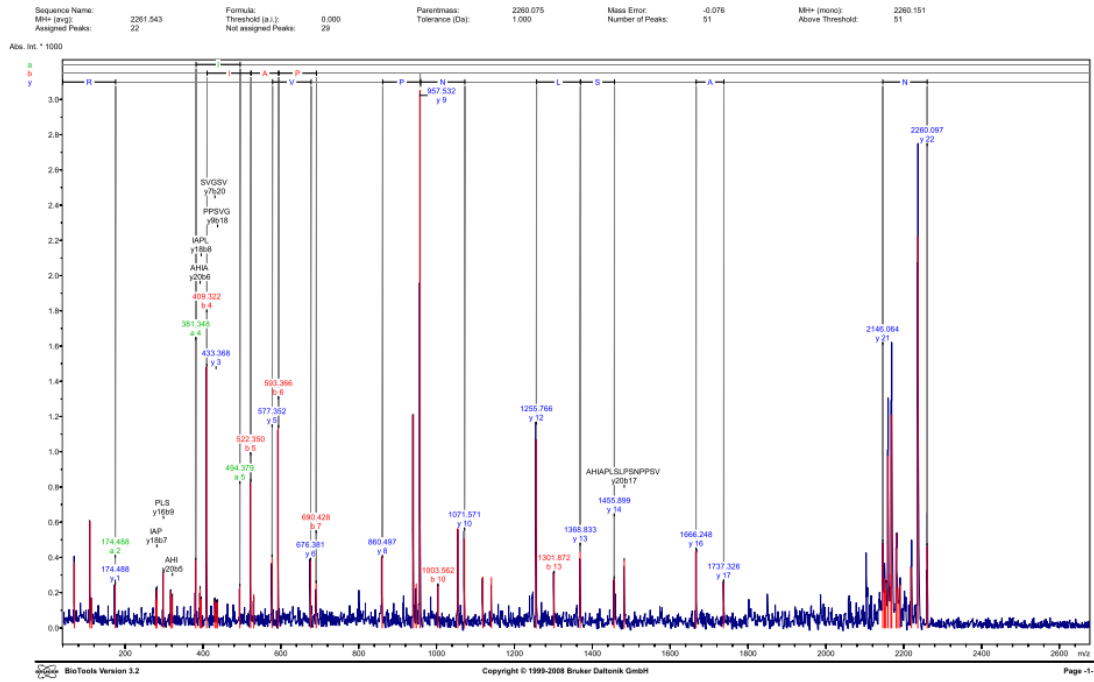

(A)

Display Parameter:   
 Parentmass: 2260.075   
 Tolerance (Da): 1.000   
 Mass Error: -0.076   
 Number of Peaks: 51   
 MH+ (mono): 2260.151   
 Above Threshold: 51   
 MH+ (avg): 2261.543   
 Assigned Peaks: 22   
 Threshold (a.i.): 0.000   
 Not assigned Peaks: 29

| Peak | Mass    | Intensity | Peak | Mass    | Intensity | Peak | Mass    | Intensity | Peak | Mass     | Intensity | Peak | Mass     | Intensity |
|------|---------|-----------|------|---------|-----------|------|---------|-----------|------|----------|-----------|------|----------|-----------|
| 13   | 288.352 | 374.161   | 3    | 217.248 | 511.231   | 8    | 174.488 | 107.750   | 4    | 174.488  | 261.429   | 11   | 226.300  | 221.000   |
| 14   | 288.352 | 374.161   | 4    | 217.248 | 511.231   | 9    | 174.488 | 178.760   | 10   | 281.545  | 301.027   | 12   | 226.300  | 221.000   |
| 15   | 288.352 | 374.161   | 5    | 217.248 | 511.231   | 10   | 174.488 | 143.419   | 11   | 437.424  | 142.920   | 13   | 226.300  | 221.000   |
| 16   | 288.352 | 374.161   | 6    | 217.248 | 511.231   | 11   | 174.488 | 1134.330  | 22   | 676.381  | 339.140   | 23   | 880.420  | 253.950   |
| 17   | 288.352 | 374.161   | 7    | 217.248 | 511.231   | 12   | 174.488 | 1140.004  | 20   | 1003.358 | 239.370   | 24   | 1058.271 | 364.410   |
| 18   | 288.352 | 374.161   | 8    | 217.248 | 511.231   | 13   | 174.488 | 1079.311  | 21   | 1301.317 | 321.450   | 25   | 1369.833 | 234.444   |
| 19   | 288.352 | 374.161   | 9    | 217.248 | 511.231   | 14   | 174.488 | 1608.387  | 20   | 2146.064 | 483.391   | 41   | 2160.151 | 236.443   |
| 20   | 288.352 | 374.161   | 10   | 217.248 | 511.231   | 15   | 174.488 | 1608.387  | 20   | 2146.064 | 483.391   | 41   | 2160.151 | 236.443   |
| 21   | 288.352 | 374.161   | 11   | 217.248 | 511.231   | 16   | 174.488 | 1608.387  | 20   | 2146.064 | 483.391   | 41   | 2160.151 | 236.443   |
| 22   | 288.352 | 374.161   | 12   | 217.248 | 511.231   | 17   | 174.488 | 1608.387  | 20   | 2146.064 | 483.391   | 41   | 2160.151 | 236.443   |
| 23   | 288.352 | 374.161   | 13   | 217.248 | 511.231   | 18   | 174.488 | 1608.387  | 20   | 2146.064 | 483.391   | 41   | 2160.151 | 236.443   |
| 24   | 288.352 | 374.161   | 14   | 217.248 | 511.231   | 19   | 174.488 | 1608.387  | 20   | 2146.064 | 483.391   | 41   | 2160.151 | 236.443   |
| 25   | 288.352 | 374.161   | 15   | 217.248 | 511.231   | 20   | 174.488 | 1608.387  | 20   | 2146.064 | 483.391   | 41   | 2160.151 | 236.443   |
| 26   | 288.352 | 374.161   | 16   | 217.248 | 511.231   | 21   | 174.488 | 1608.387  | 20   | 2146.064 | 483.391   | 41   | 2160.151 | 236.443   |
| 27   | 288.352 | 374.161   | 17   | 217.248 | 511.231   | 22   | 174.488 | 1608.387  | 20   | 2146.064 | 483.391   | 41   | 2160.151 | 236.443   |
| 28   | 288.352 | 374.161   | 18   | 217.248 | 511.231   | 23   | 174.488 | 1608.387  | 20   | 2146.064 | 483.391   | 41   | 2160.151 | 236.443   |
| 29   | 288.352 | 374.161   | 19   | 217.248 | 511.231   | 24   | 174.488 | 1608.387  | 20   | 2146.064 | 483.391   | 41   | 2160.151 | 236.443   |
| 30   | 288.352 | 374.161   | 20   | 217.248 | 511.231   | 25   | 174.488 | 1608.387  | 20   | 2146.064 | 483.391   | 41   | 2160.151 | 236.443   |
| 31   | 288.352 | 374.161   | 21   | 217.248 | 511.231   | 26   | 174.488 | 1608.387  | 20   | 2146.064 | 483.391   | 41   | 2160.151 | 236.443   |
| 32   | 288.352 | 374.161   | 22   | 217.248 | 511.231   | 27   | 174.488 | 1608.387  | 20   | 2146.064 | 483.391   | 41   | 2160.151 | 236.443   |
| 33   | 288.352 | 374.161   | 23   | 217.248 | 511.231   | 28   | 174.488 | 1608.387  | 20   | 2146.064 | 483.391   | 41   | 2160.151 | 236.443   |
| 34   | 288.352 | 374.161   | 24   | 217.248 | 511.231   | 29   | 174.488 | 1608.387  | 20   | 2146.064 | 483.391   | 41   | 2160.151 | 236.443   |
| 35   | 288.352 | 374.161   | 25   | 217.248 | 511.231   | 30   | 174.488 | 1608.387  | 20   | 2146.064 | 483.391   | 41   | 2160.151 | 236.443   |
| 36   | 288.352 | 374.161   | 26   | 217.248 | 511.231   | 31   | 174.488 | 1608.387  | 20   | 2146.064 | 483.391   | 41   | 2160.151 | 236.443   |
| 37   | 288.352 | 374.161   | 27   | 217.248 | 511.231   | 32   | 174.488 | 1608.387  | 20   | 2146.064 | 483.391   | 41   | 2160.151 | 236.443   |
| 38   | 288.352 | 374.161   | 28   | 217.248 | 511.231   | 33   | 174.488 | 1608.387  | 20   | 2146.064 | 483.391   | 41   | 2160.151 | 236.443   |
| 39   | 288.352 | 374.161   | 29   | 217.248 | 511.231   | 34   | 174.488 | 1608.387  | 20   | 2146.064 | 483.391   | 41   | 2160.151 | 236.443   |
| 40   | 288.352 | 374.161   | 30   | 217.248 | 511.231   | 35   | 174.488 | 1608.387  | 20   | 2146.064 | 483.391   | 41   | 2160.151 | 236.443   |
| 41   | 288.352 | 374.161   | 31   | 217.248 | 511.231   | 36   | 174.488 | 1608.387  | 20   | 2146.064 | 483.391   | 41   | 2160.151 | 236.443   |
| 42   | 288.352 | 374.161   | 32   | 217.248 | 511.231   | 37   | 174.488 | 1608.387  | 20   | 2146.064 | 483.391   | 41   | 2160.151 | 236.443   |
| 43   | 288.352 | 374.161   | 33   | 217.248 | 511.231   | 38   | 174.488 | 1608.387  | 20   | 2146.064 | 483.391   | 41   | 2160.151 | 236.443   |
| 44   | 288.352 | 374.161   | 34   | 217.248 | 511.231   | 39   | 174.488 | 1608.387  | 20   | 2146.064 | 483.391   | 41   | 2160.151 | 236.443   |
| 45   | 288.352 | 374.161   | 35   | 217.248 | 511.231   | 40   | 174.488 | 1608.387  | 20   | 2146.064 | 483.391   | 41   | 2160.151 | 236.443   |
| 46   | 288.352 | 374.161   | 36   | 217.248 | 511.231   | 41   | 174.488 | 1608.387  | 20   | 2146.064 | 483.391   | 41   | 2160.151 | 236.443   |
| 47   | 288.352 | 374.161   | 37   | 217.248 | 511.231   | 42   | 174.488 | 1608.387  | 20   | 2146.064 | 483.391   | 41   | 2160.151 | 236.443   |
| 48   | 288.352 | 374.161   | 38   | 217.248 | 511.231   | 43   | 174.488 | 1608.387  | 20   | 2146.064 | 483.391   | 41   | 2160.151 | 236.443   |
| 49   | 288.352 | 374.161   | 39   | 217.248 | 511.231   | 44   | 174.488 | 1608.387  | 20   | 2146.064 | 483.391   | 41   | 2160.151 | 236.443   |
| 50   | 288.352 | 374.161   | 40   | 217.248 | 511.231   | 45   | 174.488 | 1608.387  | 20   | 2146.064 | 483.391   | 41   | 2160.151 | 236.443   |
| 51   | 288.352 | 374.161   | 41   | 217.248 | 511.231   | 46   | 174.488 | 1608.387  | 20   | 2146.064 | 483.391   | 41   | 2160.151 | 236.443   |
| 52   | 288.352 | 374.161   | 42   | 217.248 | 511.231   | 47   | 174.488 | 1608.387  | 20   | 2146.064 | 483.391   | 41   | 2160.151 | 236.443   |
| 53   | 288.352 | 374.161   | 43   | 217.248 | 511.231   | 48   | 174.488 | 1608.387  | 20   | 2146.064 | 483.391   | 41   | 2160.151 | 236.443   |
| 54   | 288.352 | 374.161   | 44   | 217.248 | 511.231   | 49   | 174.488 | 1608.387  | 20   | 2146.064 | 483.391   | 41   | 2160.151 | 236.443   |
| 55   | 288.352 | 374.161   | 45   | 217.248 | 511.231   | 50   | 174.488 | 1608.387  | 20   | 2146.064 | 483.391   | 41   | 2160.151 | 236.443   |
| 56   | 288.352 | 374.161   | 46   | 217.248 | 511.231   | 51   | 174.488 | 1608.387  | 20   | 2146.064 | 483.391   | 41   | 2160.151 | 236.443   |
| 57   | 288.352 | 374.161   | 47   | 217.248 | 511.231   | 52   | 174.488 | 1608.387  | 20   | 2146.064 | 483.391   | 41   | 2160.151 | 236.443   |
| 58   | 288.352 | 374.161   | 48   | 217.248 | 511.231   | 53   | 174.488 | 1608.387  | 20   | 2146.064 | 483.391   | 41   | 2160.151 | 236.443   |
| 59   | 288.352 | 374.161   | 49   | 217.248 | 511.231   | 54   | 174.488 | 1608.387  | 20   | 2146.064 | 483.391   | 41   | 2160.151 | 236.443   |
| 60   | 288.352 | 374.161   | 50   | 217.248 | 511.231   | 55   | 174.488 | 1608.387  | 20   | 2146.064 | 483.391   | 41   | 2160.151 | 236.443   |
| 61   | 288.352 | 374.161   | 51   | 217.248 | 511.231   | 56   | 174.488 | 1608.387  | 20   | 2146.064 | 483.391   | 41   | 2160.151 | 236.443   |
| 62   | 288.352 | 374.161   | 52   | 217.248 | 511.231   | 57   | 174.488 | 1608.387  | 20   | 2146.064 | 483.391   | 41   | 2160.151 | 236.443   |
| 63   | 288.352 | 374.161   | 53   | 217.248 | 511.231   | 58   | 174.488 | 1608.387  | 20   | 2146.064 | 483.391   | 41   | 2160.151 | 236.443   |
| 64   | 288.352 | 374.161   | 54   | 217.248 | 511.231   | 59   | 174.488 | 1608.387  | 20   | 2146.064 | 483.391   | 41   | 2160.151 | 236.443   |
| 65   | 288.352 | 374.161   | 55   | 217.248 | 511.231   | 60   | 174.488 | 1608.387  | 20   | 2146.064 | 483.391   | 41   | 2160.151 | 236.443   |
| 66   | 288.352 | 374.161   | 56   | 217.248 | 511.231   | 61   | 174.488 | 1608.387  | 20   | 2146.064 | 483.391   | 41   | 2160.151 | 236.443   |
| 67   | 288.352 | 374.161   | 57   | 217.248 | 511.231   | 62   | 174.488 | 1608.387  | 20   | 2146.064 | 483.391   | 41   | 2160.151 | 236.443   |
| 68   | 288.352 | 374.161   | 58   | 217.248 | 511.231   | 63   | 174.488 | 1608.387  | 20   | 2146.064 | 483.391   | 41   | 2160.151 | 236.443   |
| 69   | 288.352 | 374.161   | 59   | 217.248 | 511.231   | 64   | 174.488 | 1608.387  | 20   | 2146.064 | 483.391   | 41   | 2160.151 | 236.443   |
| 70   | 288.352 | 374.161   | 60   | 217.248 | 511.231   | 65   | 174.488 | 1608.387  | 20   | 2146.064 | 483.391   | 41   | 2160.151 | 236.443   |
| 71   | 288.352 | 374.161   | 61   | 217.248 | 511.231   | 66   | 174.488 | 1608.387  | 20   | 2146.064 | 483.391   | 41   | 2160.151 | 236.443   |
| 72   | 288.352 | 374.161   | 62   | 217.248 | 511.231   | 67   | 174.488 | 1608.387  | 20   | 2146.064 | 483.391   | 41   | 2160.151 | 236.443   |
| 73   | 288.352 | 374.161   | 63   | 217.248 | 511.231   | 68   | 174.488 | 1608.387  | 20   | 2146.064 | 483.391   | 41   | 2160.151 | 236.443   |
| 74   | 288.352 | 374.161   | 64   | 217.248 | 511.231   | 69   | 174.488 | 1608.387  | 20   | 2146.064 | 483.391   | 41   | 2160.151 | 236.443   |
| 75   | 288.352 | 374.161   | 65   | 217.248 | 511.231   | 70   | 174.488 | 1608.387  | 20   | 2146.064 | 483.391   | 41   | 2160.151 | 236.443   |
| 76   | 288.352 | 374.161   | 66   | 217.248 | 511.231   | 71   | 174.488 | 1608.387  | 20   | 2146.064 | 483.391   | 41   | 2160.151 | 236.443   |
| 77   | 288.352 | 374.161   | 67   | 217.248 | 511.231   | 72   | 174.488 | 1608.387  | 20   | 2146.064 | 483.391   | 41   | 2160.151 | 236.443   |
| 78   | 288.352 | 374.161   | 68   | 217.248 | 511.231   | 73   | 174.488 | 1608.387  | 20   | 2146.064 | 483.391   | 41   | 2160.151 | 236.443   |
| 79   | 288.352 | 374.161   | 69   | 217.248 | 511.231   | 74   | 174.488 | 1608.387  | 20   | 2146.064 | 483.391   | 41   | 2160.151 | 236.443   |
| 80   | 288.352 | 374.161   | 70   | 217.248 | 511.231   | 75   | 174.488 | 1608.387  | 20   | 2146.064 | 483.391   | 41   | 2160.151 | 236.443   |
| 81   | 288.352 | 374.161   | 71   | 217.248 | 511.231   | 76   | 174.488 | 1608.387  | 20   | 2146.064 | 483.391   | 41   | 2160.151 | 236.443   |
| 82   | 288.352 | 374.161   | 72   | 217.248 | 511.231   | 77   | 174.488 | 1608.387  | 20   | 2146.064 | 483.391   | 41   | 2160.151 | 236.443   |
| 83   | 288.352 | 374.161   | 73   | 217.248 | 511.231   | 78   | 174.488 | 1608.387  | 20   | 2146.064 | 483.391   | 41   | 2160.151 | 236.443   |
| 84   | 288.352 | 374.16    |      |         |           |      |         |           |      |          |           |      |          |           |

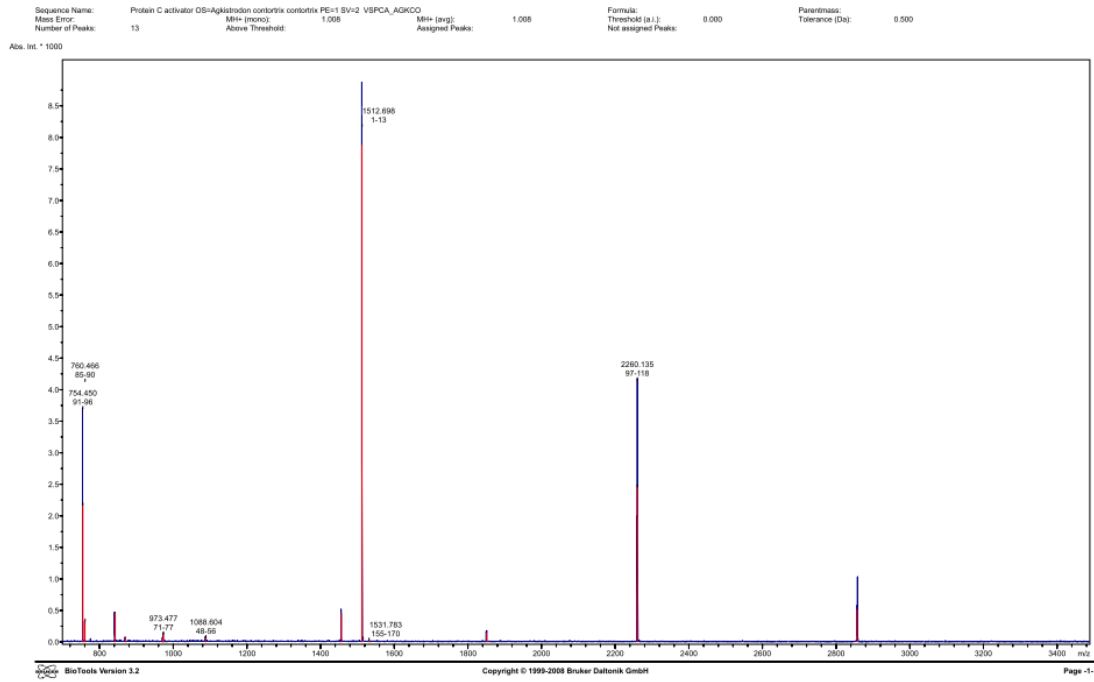

(A)

Sequence data:  
 Protein C activator OS=Aglkistrodon contortrix contortrix PE=1 SV=2 VSPCA\_AGKCO  
 Intensity Coverage: 88.1% (12970 ions) Sequence Coverage MS: 34.2%  
 Sequence Coverage MS/MS: 0.0% pI (isoelectric point): 9.7

|            |            |            |            |            |           |            |            |            |            |            |            |            |
|------------|------------|------------|------------|------------|-----------|------------|------------|------------|------------|------------|------------|------------|
| 1-0        | 2-0        | 3-0        | 4-0        | 5-0        | 6-0       | 7-0        | 8-0        | 9-0        | 1-0-0      | 1-1-0      |            |            |
| VIGDECHEN  | ENRFLALVYA | NQS        | LCOOTLI    | HQEWVLTARH | CDRGNHRIE | GMHNLK     | VLSK       | DALRRFPKKE | YFCLNTRNDG | IWDKDIHLIR | LNRFPVRSAN | IAPLPLPSNP |
| 1-2-0      | 1-3-0      | 1-4-0      | 1-5-0      | 1-6-0      | 1-7-0     | 1-8-0      | 1-9-0      | 2-0-0      | 2-1-0      | 2-2-0      |            |            |
| PSVGSVCRIM | GWGITSPNA  | ILPDVPRCAN | INILDYAVCQ | AAYKGLAAT  | LCAGILEGK | DTCKGDSGGP | LICNGQFQGI | LSVGGNPCAQ | PRKPGIYIKV | FDYTDWIQSI |            |            |
| 2-3-0      | 2-4-0      |            |            |            |           |            |            |            |            |            |            |            |
| ISGNTDATCP | P          |            |            |            |           |            |            |            |            |            |            |            |

Display Parameter:  
 Sequence Name: Protein C activator OS=Aglkistrodon contortrix contortrix PE=1 SV=2 VSPCA\_AGKCO  
 Threshold (s.l.): 0.000 Tolerance (Da): 0.500 Number of Peaks: 13 M+ (mono): 1.008 M+ (avg): 1.008

| Peak | Mass     | Intensity | Peak | Mass     | Intensity | Peak | Mass     | Intensity | Peak | Mass     | Intensity | Peak | Mass     | Intensity |
|------|----------|-----------|------|----------|-----------|------|----------|-----------|------|----------|-----------|------|----------|-----------|
| 1    | 754.450  | 2164.000  | 3    | 769.489  | 321.000   | 3    | 842.521  | 283.710   | 4    | 870.555  | 65.340    | 5    | 897.587  | 80.437    |
| 11   | 1088.604 | 78.928    | 8    | 1095.120 | 285.720   | 9    | 1512.868 | 2873.710  | 10   | 1531.783 | 27.000    | 11   | 1950.120 | 11.260    |
| 13   | 2280.135 | 810.887   |      |          |           |      |          |           |      |          |           |      | 2360.330 | 125.450   |

(B)

Figure S19. Annotated MS spectrum detected in area #5. (A) MS spectrum; (B) Peak list and sequence data.



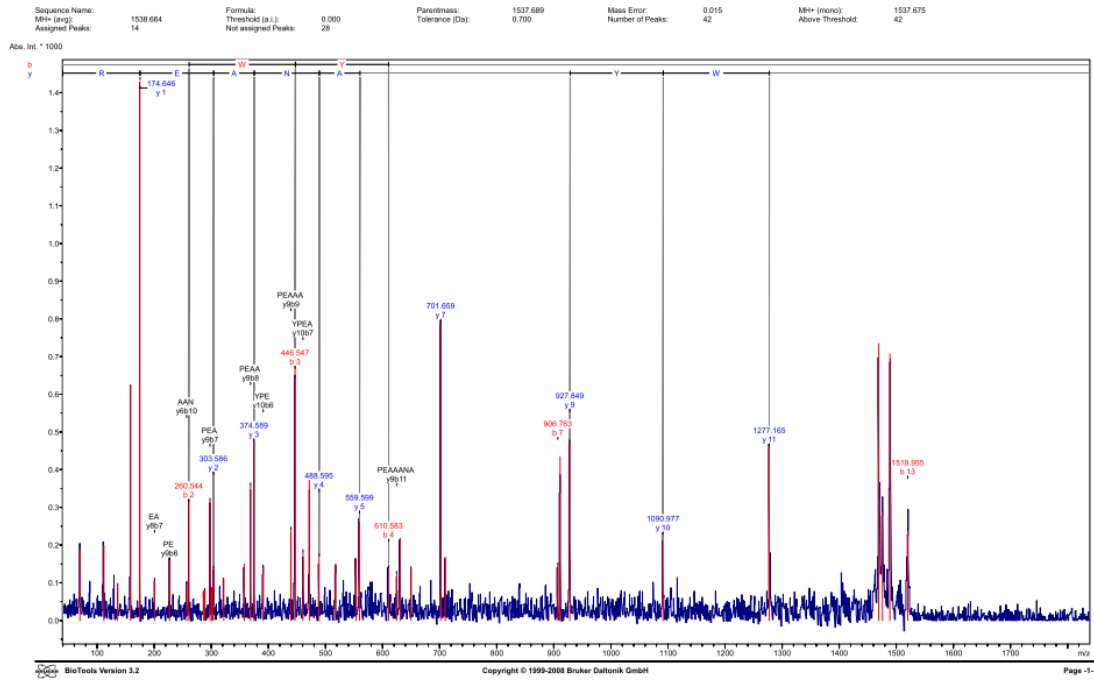

(A)

Display Parameter: Parentmass: 1537.689 Mass Error: 0.015 MH+ (mono): 1537.675 MH+ (avg): 1538.664 Threshold (a.l.): 0.000  
 Tolerance (Da): 0.700 Number of Peaks: 42 Above Threshold: 42 Assigned Peaks: 14 Not assigned Peaks: 26

| Peak | Mass     | Intensity | Peak | Mass     | Intensity | Peak | Mass     | Intensity | Peak | Mass     | Intensity | Peak | Mass     | Intensity |
|------|----------|-----------|------|----------|-----------|------|----------|-----------|------|----------|-----------|------|----------|-----------|
| 1    | 89.793   | 117.061   | 1    | 117.072  | 10.247    | 3    | 55.955   | 37.715    | 4    | 165.934  | 64.831    | 5    | 4.641    | 134.816   |
| 2    | 226.055  | 160.811   | 3    | 252.213  | 37.210    | 5    | 250.544  | 321.451   | 10   | 286.951  | 75.900    | 11   | 258.527  | 80.455    |
| 13   | 350.959  | 66.700    | 11   | 303.995  | 136.544   | 15   | 311.959  | 119.154   | 16   | 327.914  | 159.954   | 17   | 326.954  | 174.449   |
| 19   | 380.974  | 140.414   | 20   | 439.963  | 24.103    | 21   | 446.947  | 574.705   | 22   | 460.911  | 181.083   | 23   | 471.963  | 373.813   |
| 25   | 517.951  | 121.916   | 24   | 551.945  | 153.320   | 27   | 559.959  | 962.805   | 28   | 610.933  | 137.952   | 29   | 624.924  | 114.450   |
| 31   | 656.939  | 133.430   | 32   | 703.929  | 783.320   | 33   | 709.940  | 169.742   | 34   | 806.783  | 143.267   | 35   | 810.770  | 434.372   |
| 38   | 1050.911 | 217.281   | 39   | 1217.789 | 468.720   | 39   | 1426.120 | 184.291   | 41   | 1416.955 | 268.271   | 41   | 1488.441 | 787.730   |
| 41   | 1537.689 | 1000.000  |      |          |           |      |          |           |      |          |           |      |          |           |

Calculated Masses: MEWVPEAAANAEER

| No | Term | Ion      | a        | b | y | C-term   | Ion |
|----|------|----------|----------|---|---|----------|-----|
| 1  | M    | 1542.050 | 139.440  |   |   | 12.8.113 | R   |
| 2  | E    | 239.059  | 261.090  |   |   | 3.4.163  | R   |
| 3  | W    | 416.176  | 447.170  |   |   | 37.5.159 | A   |
| 4  | Y    | 165.934  | 618.323  |   |   | 6.9.161  | N   |
| 5  | P    | 678.921  | 710.320  |   |   | 56.9.219 | A   |
| 6  | A    | 89.793   | 90.306   |   |   | 1.1.161  | A   |
| 7  | A    | 875.371  | 907.363  |   |   | 7.9.163  | A   |
| 8  | A    | 892.400  | 918.400  |   |   | 8.1.160  | E   |
| 9  | A    | 1074.451 | 1076.451 |   |   | 9.4.161  | E   |
| 10 | N    | 1126.450 | 1128.450 |   |   | 10.1.172 | V   |
| 11 | A    | 1208.920 | 1210.920 |   |   | 12.7.161 | V   |
| 12 | E    | 1338.920 | 1340.920 |   |   | 13.6.161 | E   |
| 13 | E    | 1497.650 | 1499.650 |   |   | 15.1.161 | E   |

Copyright © 1999-2008 Bruker Daltonik GmbH

(B)

Figure S21. Annotated MS/MS spectrum of ion 1537.689 m/z detected in area #7. (A) MS/MS spectrum; (B) Peak list and amino acid sequence.

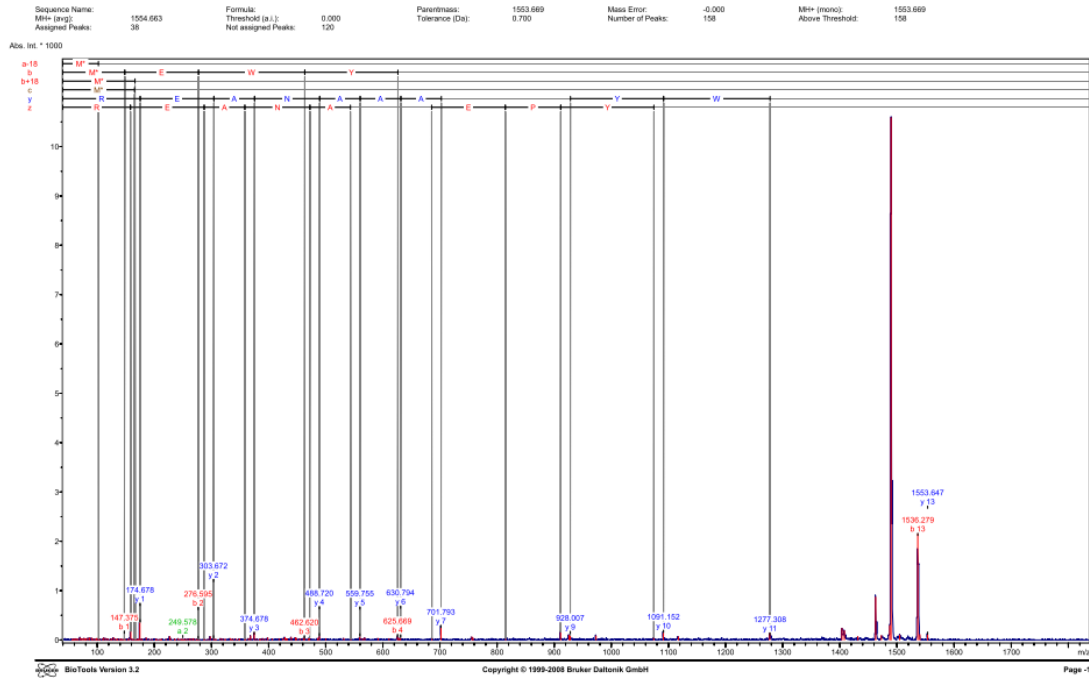

(A)

Display Parameter: Parentmass: 1553.669 Mass Error: -0.000 M+ (mono): 1553.669 M+ (avg): 1554.663 Threshold (a.i.): 0.000 Tolerance (Da): 0.700 Number of Peaks: 158 Above Threshold: 158 Not assigned Peaks: 120

| Peak | Mass     | Intensity | Peak | Mass     | Intensity | Peak | Mass     | Intensity | Peak | Mass     | Intensity | Peak | Mass     | Intensity |
|------|----------|-----------|------|----------|-----------|------|----------|-----------|------|----------|-----------|------|----------|-----------|
| 23   | 55.800   | 15.044    | 4    | 71.022   | 15.123    | 4    | 82.044   | 15.211    | 5    | 92.441   | 21.144    | 11   | 84.933   | 19.473    |
| 24   | 66.163   | 10.261    | 3    | 69.719   | 25.803    | 3    | 77.820   | 21.155    | 10   | 74.300   | 23.067    | 11   | 77.973   | 31.901    |
| 10   | 80.613   | 18.934    | 11   | 13.525   | 18.964    | 12   | 68.981   | 40.060    | 18   | 96.207   | 19.081    | 17   | 63.243   | 13.350    |
| 18   | 88.343   | 21.440    | 30   | 99.344   | 13.268    | 21   | 169.319  | 20.800    | 25   | 104.762  | 11.769    | 23   | 108.911  | 22.899    |
| 31   | 133.819  | 7.585     | 35   | 118.974  | 19.294    | 32   | 102.564  | 8.752     | 34   | 124.758  | 15.439    | 32   | 129.714  | 22.442    |
| 33   | 134.455  | 9.787     | 35   | 132.933  | 19.977    | 33   | 158.739  | 15.174    | 34   | 141.989  | 17.351    | 32   | 149.711  | 16.976    |
| 37   | 167.335  | 11.674    | 38   | 140.174  | 11.417    | 39   | 163.648  | 15.110    | 40   | 136.080  | 12.420    | 41   | 158.850  | 17.513    |
| 38   | 168.789  | 25.011    | 41   | 105.055  | 15.582    | 42   | 105.612  | 17.403    | 43   | 110.058  | 12.451    | 41   | 115.950  | 19.433    |
| 48   | 177.224  | 12.864    | 50   | 178.260  | 14.820    | 51   | 165.550  | 40.183    | 52   | 181.177  | 16.303    | 53   | 165.910  | 11.130    |
| 55   | 203.562  | 16.549    | 59   | 205.435  | 15.424    | 54   | 200.919  | 8.884     | 57   | 210.523  | 18.117    | 59   | 219.211  | 14.429    |
| 63   | 228.628  | 72.131    | 63   | 228.534  | 10.427    | 63   | 228.187  | 13.872    | 63   | 238.934  | 10.007    | 65   | 241.673  | 25.481    |
| 67   | 237.209  | 14.864    | 68   | 448.529  | 8.981     | 68   | 611.133  | 4.034     | 61   | 263.164  | 14.401    | 71   | 258.083  | 8.313     |
| 73   | 261.999  | 16.848    | 74   | 264.349  | 18.316    | 75   | 287.638  | 25.076    | 76   | 270.819  | 16.363    | 77   | 274.873  | 11.923    |
| 85   | 318.811  | 7.294     | 85   | 285.673  | 12.429    | 81   | 315.547  | 26.713    | 82   | 314.657  | 17.657    | 83   | 277.638  | 27.414    |
| 88   | 318.954  | 10.569    | 87   | 307.977  | 13.443    | 88   | 313.441  | 27.448    | 88   | 318.181  | 17.811    | 88   | 324.191  | 10.329    |
| 91   | 332.867  | 27.430    | 92   | 330.746  | 10.017    | 93   | 337.862  | 14.269    | 94   | 342.656  | 16.880    | 95   | 337.820  | 17.171    |
| 103  | 358.063  | 44.916    | 98   | 358.718  | 15.513    | 96   | 355.863  | 28.461    | 100  | 368.658  | 18.179    | 101  | 373.874  | 10.426    |
| 103  | 384.209  | 12.883    | 104  | 385.880  | 16.939    | 105  | 389.589  | 28.809    | 109  | 384.445  | 13.183    | 109  | 388.640  | 45.133    |
| 109  | 418.268  | 21.484    | 110  | 424.874  | 10.441    | 111  | 429.411  | 40.919    | 112  | 436.959  | 24.461    | 113  | 439.262  | 18.433    |
| 119  | 448.609  | 46.211    | 118  | 444.620  | 10.127    | 117  | 464.873  | 20.419    | 118  | 460.910  | 10.067    | 119  | 468.420  | 44.680    |
| 121  | 411.611  | 26.531    | 122  | 485.924  | 11.481    | 123  | 488.280  | 8.413     | 124  | 489.103  | 28.520    | 125  | 491.690  | 10.359    |
| 123  | 586.755  | 73.858    | 128  | 584.503  | 23.028    | 129  | 588.277  | 39.777    | 130  | 587.441  | 31.858    | 131  | 610.850  | 23.877    |
| 130  | 614.815  | 16.503    | 131  | 616.794  | 18.681    | 132  | 615.881  | 40.481    | 133  | 617.183  | 20.919    | 134  | 620.901  | 30.359    |
| 133  | 614.815  | 93.187    | 134  | 618.085  | 16.081    | 141  | 626.007  | 107.481   | 142  | 626.007  | 206.014   | 143  | 679.113  | 18.856    |
| 140  | 1081.152 | 136.306   | 136  | 1117.177 | 65.137    | 147  | 1277.268 | 146.020   | 148  | 1403.059 | 206.019   | 149  | 1407.960 | 188.140   |
| 151  | 1462.465 | 166.400   | 145  | 1474.633 | 65.967    | 153  | 1467.268 | 261.464   | 152  | 1488.814 | 1099.260  | 154  | 1504.217 | 130.452   |
| 153  | 1540.109 | 158.759   | 153  | 1553.647 | 109.809   | 153  | 1553.647 | 109.809   | 153  | 1553.647 | 109.809   | 153  | 1553.647 | 109.809   |

Calculated Masses: MSWVPEAAAKDSE1 Oxidation (M)

| Residue | Mon | a       | b       | b+16    | b       | b+17    | b+18    | b+18    | b+18    | c       | e       | e       | e       | Chrom | Seq |
|---------|-----|---------|---------|---------|---------|---------|---------|---------|---------|---------|---------|---------|---------|-------|-----|
| 1       | W   | 170.048 | 170.021 | 192.037 | 148.043 | 131.019 | 132.032 | 166.053 | 165.069 | 120.048 | 201.058 | 175.119 | 158.092 | 13    | W   |
| 2       | E   | 240.090 | 240.063 | 277.085 | 200.095 | 229.074 | 226.091 | 261.110 | 262.092 | 151.113 | 284.101 | 261.125 | 281.125 | 11    | E   |
| 3       | W   | 170.048 | 170.021 | 192.037 | 148.043 | 131.019 | 132.032 | 166.053 | 165.069 | 120.048 | 201.058 | 175.119 | 158.092 | 13    | W   |
| 4       | Y   | 166.053 | 166.026 | 188.042 | 144.048 | 127.024 | 128.037 | 162.058 | 161.074 | 116.053 | 197.063 | 172.124 | 155.097 | 11    | Y   |
| 5       | F   | 166.053 | 166.026 | 188.042 | 144.048 | 127.024 | 128.037 | 162.058 | 161.074 | 116.053 | 197.063 | 172.124 | 155.097 | 11    | F   |
| 6       | A   | 84.026  | 84.000  | 106.016 | 62.032  | 45.008  | 46.021  | 80.041  | 79.057  | 34.026  | 63.035  | 48.096  | 33.070  | 6     | A   |
| 7       | A   | 84.026  | 84.000  | 106.016 | 62.032  | 45.008  | 46.021  | 80.041  | 79.057  | 34.026  | 63.035  | 48.096  | 33.070  | 6     | A   |
| 8       | R   | 99.040  | 99.014  | 121.030 | 77.046  | 60.022  | 61.035  | 95.048  | 94.064  | 49.040  | 64.049  | 49.099  | 34.073  | 8     | R   |
| 9       | A   | 84.026  | 84.000  | 106.016 | 62.032  | 45.008  | 46.021  | 80.041  | 79.057  | 34.026  | 63.035  | 48.096  | 33.070  | 6     | A   |
| 10      | S   | 115.043 | 115.017 | 137.033 | 93.049  | 76.023  | 77.036  | 111.049 | 110.065 | 41.043  | 56.052  | 41.111  | 26.085  | 10    | S   |
| 11      | D   | 133.030 | 133.004 | 155.020 | 111.036 | 94.010  | 95.023  | 129.036 | 128.052 | 59.030  | 74.039  | 59.107  | 44.081  | 11    | D   |
| 12      | S   | 115.043 | 115.017 | 137.033 | 93.049  | 76.023  | 77.036  | 111.049 | 110.065 | 41.043  | 56.052  | 41.111  | 26.085  | 10    | S   |
| 13      | R   | 107.061 | 107.035 | 129.051 | 85.067  | 68.041  | 69.054  | 103.067 | 102.083 | 37.061  | 52.070  | 37.128  | 22.092  | 13    | R   |

(B)

Figure S22. Annotated MS/MS spectrum of ion 1553.669 m/z detected in area #7. (A) MS/MS spectrum; (B) Peak list and amino acid sequence.



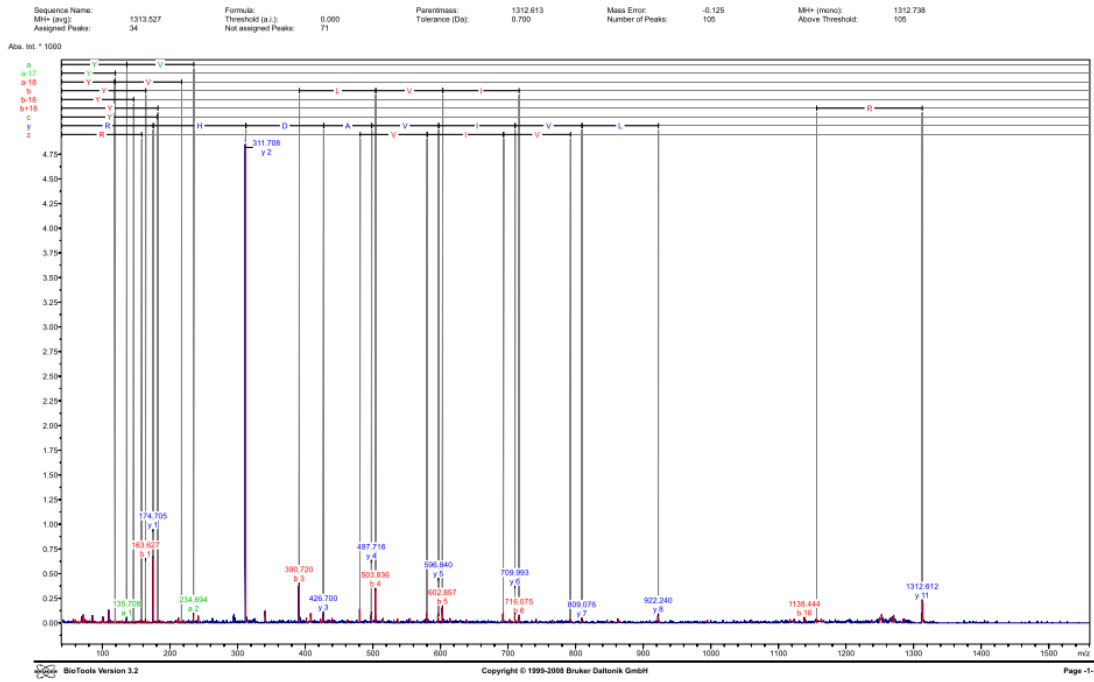

BioTools Version 3.2 Copyright © 1999-2008 Bruker Daltonik GmbH Page -1-

(A)

Display Parameter: Parentmass: 1312.613 Mass Error: -0.125 Mi+ (mono): 1312.738 Mi+ (avg): 1313.527 Threshold (a.i.): 0.000 Tolerance (Da): 0.700 Number of Peaks: 105 Above Threshold: 105 Not assigned Peaks: 71

| Peak | Mass     | Intensity | Peak | Mass     | Intensity | Peak | Mass     | Intensity | Peak | Mass     | Intensity | Peak | Mass     | Intensity |
|------|----------|-----------|------|----------|-----------|------|----------|-----------|------|----------|-----------|------|----------|-----------|
| 1    | 67.055   | 1.000     | 2    | 99.760   | 1.000     | 3    | 81.307   | 19.103    | 4    | 85.311   | 7.951     | 5    | 97.915   | 7.784     |
| 6    | 71.702   | 82.261    | 7    | 74.986   | 13.307    | 8    | 80.640   | 23.450    | 9    | 82.977   | 13.111    | 10   | 85.760   | 10.430    |
| 11   | 80.859   | 6.536     | 12   | 84.903   | 10.200    | 13   | 89.662   | 10.000    | 14   | 93.333   | 6.922     | 15   | 96.780   | 6.000     |
| 16   | 106.897  | 9.481     | 17   | 109.744  | 125.703   | 18   | 112.252  | 19.800    | 19   | 114.293  | 14.711    | 20   | 116.851  | 10.151    |
| 21   | 114.663  | 13.730    | 22   | 122.223  | 17.929    | 23   | 128.818  | 19.044    | 24   | 126.747  | 15.201    | 25   | 129.921  | 11.350    |
| 31   | 139.622  | 16.711    | 32   | 142.749  | 17.639    | 33   | 154.269  | 14.136    | 34   | 146.555  | 12.113    | 35   | 152.250  | 14.300    |
| 36   | 157.693  | 26.511    | 37   | 162.995  | 8.711     | 38   | 161.589  | 9.709     | 39   | 163.929  | 13.204    | 40   | 169.691  | 8.780     |
| 41   | 174.703  | 849.691   | 42   | 178.073  | 12.303    | 43   | 180.301  | 17.432    | 44   | 181.623  | 30.123    | 45   | 185.739  | 24.473    |
| 46   | 197.693  | 16.516    | 47   | 198.964  | 12.289    | 48   | 197.489  | 19.163    | 49   | 198.911  | 20.897    | 50   | 200.291  | 20.824    |
| 51   | 216.859  | 14.177    | 52   | 219.985  | 13.544    | 53   | 224.713  | 16.814    | 54   | 224.994  | 30.759    | 55   | 241.691  | 39.686    |
| 56   | 250.752  | 120.694   | 57   | 260.721  | 485.468   | 58   | 261.990  | 37.950    | 59   | 268.693  | 22.417    | 60   | 267.720  | 36.350    |
| 61   | 285.744  | 29.511    | 62   | 293.691  | 10.000    | 63   | 293.691  | 10.000    | 64   | 293.691  | 10.000    | 65   | 293.691  | 10.000    |
| 71   | 314.700  | 48.120    | 72   | 338.719  | 39.837    | 73   | 354.815  | 35.951    | 74   | 349.338  | 107.914   | 75   | 356.840  | 30.156    |
| 81   | 414.611  | 39.201    | 82   | 438.717  | 31.067    | 83   | 459.904  | 113.169   | 84   | 469.543  | 25.160    | 85   | 479.951  | 16.810    |
| 86   | 492.023  | 30.960    | 87   | 502.960  | 26.521    | 88   | 511.087  | 36.711    | 89   | 500.700  | 57.350    | 90   | 487.017  | 21.480    |
| 91   | 622.201  | 24.181    | 92   | 656.119  | 21.061    | 93   | 650.311  | 26.353    | 94   | 619.700  | 31.941    | 95   | 629.941  | 31.859    |
| 96   | 1166.474 | 52.278    | 97   | 1164.021 | 39.308    | 98   | 1738.311 | 25.021    | 99   | 1249.600 | 37.660    | 100  | 1269.810 | 83.191    |
| 101  | 1210.969 | 72.929    | 102  | 1264.959 | 28.521    | 103  | 1372.811 | 29.084    |      |          |           |      |          |           |

Calculated Masses: YIGLVVWVHRE

| R-Term | Ion | a        | a-17     | a-16     | b        | b-17     | b-16     | b+16     | c        | l        | x        | y        | z        | C-Term | Ion |
|--------|-----|----------|----------|----------|----------|----------|----------|----------|----------|----------|----------|----------|----------|--------|-----|
| 1      | V   | 136.070  | 119.040  | 118.083  | 164.071  | 147.041  | 146.080  | 182.081  | 181.097  | 136.070  | 201.088  | 175.119  | 158.092  | 11     | R   |
| 2      | V   | 235.146  | 218.114  | 217.134  | 263.130  | 246.119  | 245.159  | 281.150  | 280.164  | 234.081  | 338.159  | 312.178  | 295.151  | 10     | L   |
| 3      | D   | 361.201  | 345.170  | 344.190  | 391.199  | 374.171  | 373.187  | 409.208  | 408.224  | 361.201  | 451.184  | 427.205  | 410.179  | 9      | D   |
| 4      | V   | 476.257  | 460.226  | 459.246  | 504.252  | 487.224  | 486.240  | 521.251  | 520.265  | 476.257  | 561.241  | 537.262  | 520.255  | 8      | V   |
| 5      | V   | 591.313  | 575.282  | 574.302  | 618.311  | 601.283  | 600.299  | 635.310  | 634.324  | 591.313  | 675.307  | 651.328  | 634.321  | 7      | V   |
| 6      | V   | 706.369  | 690.338  | 689.358  | 732.367  | 715.339  | 714.355  | 749.366  | 748.380  | 706.369  | 789.373  | 765.394  | 748.387  | 6      | V   |
| 7      | A   | 821.425  | 805.394  | 804.414  | 847.423  | 830.395  | 829.411  | 864.422  | 863.436  | 821.425  | 904.429  | 880.450  | 863.443  | 5      | A   |
| 8      | D   | 936.481  | 920.450  | 919.470  | 961.479  | 944.451  | 943.467  | 978.478  | 977.492  | 936.481  | 1018.485 | 994.506  | 977.499  | 4      | D   |
| 9      | H   | 1101.537 | 1085.506 | 1084.526 | 1126.535 | 1109.507 | 1108.523 | 1143.534 | 1142.548 | 1101.537 | 1181.541 | 1157.562 | 1140.555 | 3      | H   |
| 10     | H   | 1110.613 | 1094.582 | 1093.602 | 1134.611 | 1117.583 | 1116.599 | 1151.610 | 1150.624 | 1110.613 | 1190.617 | 1166.638 | 1155.631 | 2      | H   |
| 11     | R   | 1275.669 | 1259.638 | 1258.658 | 1300.667 | 1283.639 | 1282.655 | 1317.666 | 1316.680 | 1275.669 | 1355.683 | 1331.704 | 1320.697 | 1      | R   |

BioTools Version 3.2 Copyright © 1999-2008 Bruker Daltonik GmbH Page -2-

(B)

Figure S24. Annotated MS/MS spectrum of ion 1312.613 m/z detected in area #8. (A) MS/MS spectrum; (B) Peak list and amino acid sequence.



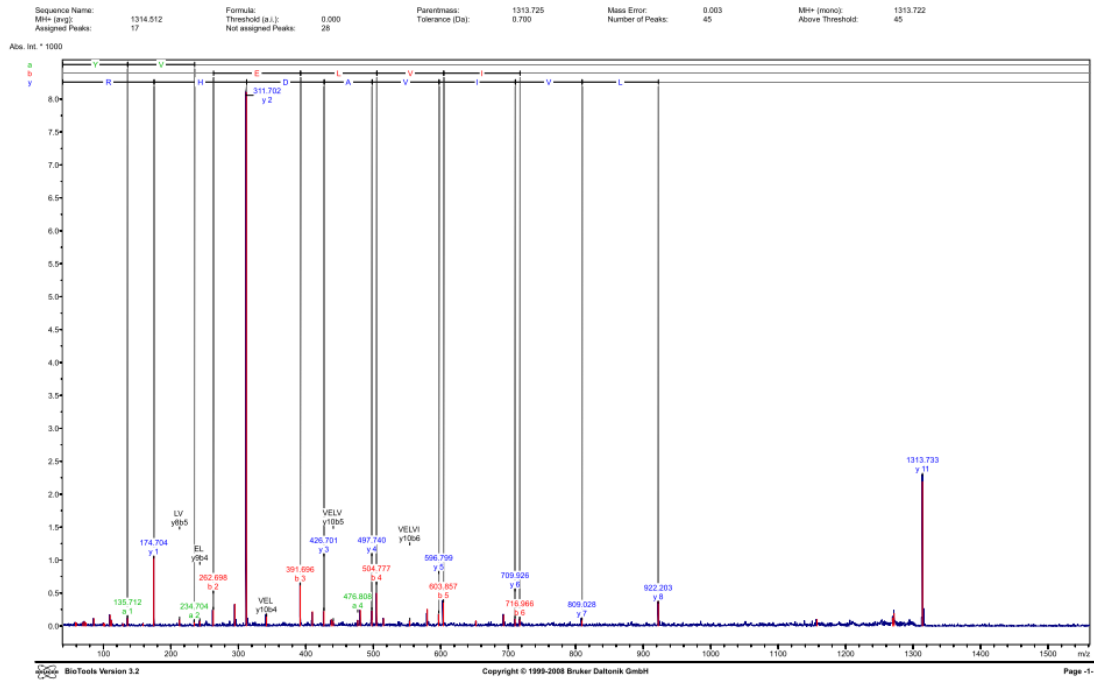

(A)

Display Parameter: 1313.725 Mass Error: 0.003 M+ (mono): 1313.722 M+ (avg): 1314.512 Threshold (a.l.): 0.000  
 Tolerance (Da): 0.700 Number of Peaks: 45 Above Threshold: 45 Assigned Peaks: 17 Not assigned Peaks: 28

| Peak | Mass     | Intensity | Peak | Mass     | Intensity | Peak | Mass     | Intensity | Peak | Mass    | Intensity | Peak | Mass    | Intensity |
|------|----------|-----------|------|----------|-----------|------|----------|-----------|------|---------|-----------|------|---------|-----------|
| 1    | 58.071   | 35.277    | 4    | 66.913   | 4.811     | 3    | 69.711   | 30.242    | 4    | 71.800  | 67.261    | 5    | 74.201  | 27.244    |
| 2    | 89.724   | 40.187    | 3    | 107.744  | 25.009    | 6    | 109.764  | 163.000   | 10   | 111.700 | 67.887    | 11   | 128.740 | 35.930    |
| 10   | 138.213  | 35.891    | 14   | 174.905  | 1031.483  | 15   | 217.224  | 98.064    | 16   | 224.194 | 67.261    | 17   | 257.753 | 77.283    |
| 18   | 284.822  | 332.390   | 20   | 311.702  | 8116.486  | 21   | 341.740  | 182.061   | 22   | 381.890 | 456.763   | 23   | 408.887 | 219.189   |
| 24   | 437.893  | 36.141    | 25   | 481.724  | 27.779    | 26   | 483.569  | 24.024    | 28   | 509.710 | 230.000   | 29   | 537.756 | 236.152   |
| 30   | 574.700  | 117.380   | 31   | 523.642  | 30.027    | 33   | 539.800  | 253.986   | 34   | 588.789 | 100.140   | 35   | 603.821 | 58.140    |
| 37   | 622.923  | 188.171   | 38   | 709.026  | 115.282   | 39   | 715.980  | 104.510   | 40   | 809.020 | 122.810   | 41   | 822.203 | 27.182    |
| 43   | 1280.717 | 12.021    | 44   | 1271.825 | 100.262   | 45   | 1313.722 | 2160.929  |      |         |           |      |         |           |

Calculated Masses:  
 YVELVWACHR

| Ion | Ion | a       | b       | y       | Q-Term | Ion |
|-----|-----|---------|---------|---------|--------|-----|
| 1   | V   | 238.070 | 282.090 | Y4.113  | 10     | R   |
| 2   | V   | 235.144 | 281.139 | Y12.193 | 10     | R   |
| 3   | L   | 269.191 | 302.189 | Y2.162  | 3      | A   |
| 4   | V   | 276.330 | 304.334 | Y9.310  | 7      | V   |
| 5   | L   | 292.490 | 312.431 | Y10.384 | 6      | L   |
| 6   | V   | 328.490 | 318.430 | Y9.483  | 5      | V   |
| 7   | A   | 335.020 | 319.624 | Y2.474  | 4      | L   |
| 8   | D   | 374.500 | 309.351 | Y10.180 | 3      | L   |
| 9   | R   | 413.810 | 320.391 | Y10.093 | 3      | L   |
| 11  | R   | 420.710 | 320.711 | Y13.721 | 1      | V   |

Copyright © 1999-2008 Bruker Daltonik GmbH

(B)

Figure S25. Annotated MS/MS spectrum of ion 1313.725 *m/z* detected in area #8. (A) MS/MS spectrum; (B) Peak list and amino acid sequence.

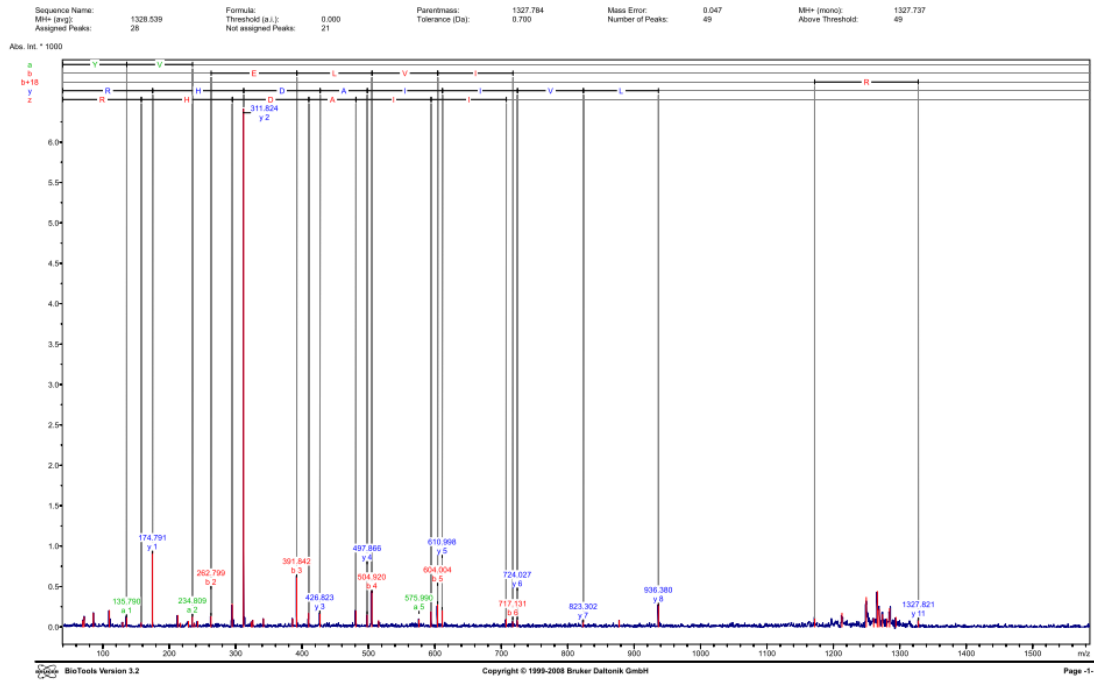

(A)

Display Parameter:  
 Parent mass: 1327.784  
 Tolerance (Da): 0.700  
 Mass Error: 0.047  
 Number of Peaks: 49  
 MH+ (mono): 1327.737  
 Above Threshold: 49  
 MH+ (avg): 1328.539  
 Assigned Peaks: 26  
 Threshold (s.l.): 0.000  
 Not assigned Peaks: 21

| Peak | Mass     | Intensity | Peak | Mass     | Intensity | Peak | Mass     | Intensity | Peak | Mass     | Intensity | Peak | Mass     | Intensity |
|------|----------|-----------|------|----------|-----------|------|----------|-----------|------|----------|-----------|------|----------|-----------|
| 1    | 89.055   | 77.853    | 1    | 71.064   | 103.011   | 1    | 85.838   | 109.149   | 1    | 109.800  | 254.142   | 1    | 29.854   | 35.990    |
| 2    | 107.700  | 50.174    | 2    | 174.791  | 328.260   | 2    | 232.826  | 142.780   | 10   | 216.250  | 26.620    | 11   | 228.820  | 65.116    |
| 3    | 139.499  | 43.093    | 3    | 224.874  | 45.323    | 3    | 259.292  | 137.165   | 11   | 269.104  | 293.950   | 12   | 311.824  | 34.367    |
| 10   | 328.874  | 32.731    | 20   | 341.840  | 181.439   | 21   | 385.833  | 39.009    | 22   | 381.842  | 448.345   | 23   | 409.815  | 137.233   |
| 20   | 430.864  | 206.363   | 24   | 497.856  | 139.814   | 25   | 534.820  | 45.114    | 26   | 616.328  | 79.261    | 27   | 739.897  | 91.352    |
| 30   | 694.034  | 261.449   | 33   | 819.988  | 229.061   | 34   | 787.024  | 107.243   | 35   | 747.131  | 91.150    | 36   | 724.027  | 89.774    |
| 38   | 817.816  | 30.385    | 39   | 828.309  | 283.181   | 39   | 1111.684 | 139.669   | 40   | 1029.814 | 111.284   | 41   | 1249.284 | 100.426   |
| 43   | 1265.825 | 441.319   | 44   | 1268.849 | 218.829   | 45   | 1273.839 | 183.291   | 46   | 1280.850 | 107.603   | 47   | 1324.831 | 229.372   |
| 49   | 1327.821 | 86.927    |      |          |           |      |          |           |      |          |           |      |          |           |

Calculated Masses:  
 YVELVQDRIH

| b-Term | Ion | a        | a-17     | a-18     | b        | b-17     | b-18     | b+18     | c        | i        | s        | y        | z        | C-Term | Seq |
|--------|-----|----------|----------|----------|----------|----------|----------|----------|----------|----------|----------|----------|----------|--------|-----|
| 1      | V   | 136.076  | 118.040  | 118.069  | 184.074  | 147.044  | 146.060  | 182.081  | 181.097  | 186.078  | 201.098  | 175.119  | 168.092  | 11     | R   |
| 2      | V   | 233.146  | 215.110  | 214.134  | 283.130  | 246.100  | 245.116  | 283.135  | 282.151  | 287.161  | 324.181  | 319.174  | 288.151  | 10     | L   |
| 3      | E   | 324.181  | 306.145  | 305.169  | 352.183  | 315.153  | 314.171  | 418.192  | 409.208  | 402.055  | 453.184  | 427.205  | 410.179  | 9      | D   |
| 4      | V   | 419.217  | 401.181  | 400.205  | 458.219  | 421.189  | 420.205  | 525.216  | 516.232  | 508.089  | 562.218  | 536.242  | 481.218  | 8      | L   |
| 5      | V   | 475.338  | 457.302  | 456.326  | 504.334  | 467.304  | 466.320  | 559.332  | 550.348  | 541.201  | 597.335  | 571.358  | 544.338  | 7      | L   |
| 6      | I   | 609.420  | 591.384  | 590.408  | 617.413  | 580.383  | 579.399  | 699.435  | 690.451  | 748.440  | 68.088   | 750.380  | 724.410  | 6      | L   |
| 7      | V   | 636.461  | 618.425  | 617.449  | 630.454  | 593.424  | 592.440  | 675.451  | 674.467  | 683.094  | 740.469  | 724.418  | 695.458  | 5      | L   |
| 8      | A   | 874.543  | 856.507  | 855.531  | 891.535  | 854.505  | 853.521  | 919.550  | 918.566  | 944.083  | 897.514  | 936.563  | 912.537  | 4      | L   |
| 9      | V   | 969.579  | 951.543  | 950.567  | 1016.569 | 979.539  | 978.555  | 1048.574 | 1047.590 | 1078.099 | 1001.544 | 1048.599 | 1024.572 | 3      | L   |
| 10     | H   | 1126.630 | 1108.594 | 1107.618 | 1163.632 | 1126.602 | 1125.618 | 1197.637 | 1196.653 | 1188.071 | 1180.603 | 1164.674 | 1147.647 | 2      | V   |
| 11     | H   | 1281.713 | 1263.677 | 1262.701 | 1318.714 | 1281.684 | 1280.700 | 1352.723 | 1351.739 | 1384.113 | 1353.118 | 1387.723 | 1310.710 | 1      | V   |

(B)

Figure S26. Annotated MS/MS spectrum of ion 1327.784 m/z detected in area #8. (A) MS/MS spectrum; (B) Peak list and amino acid sequence.



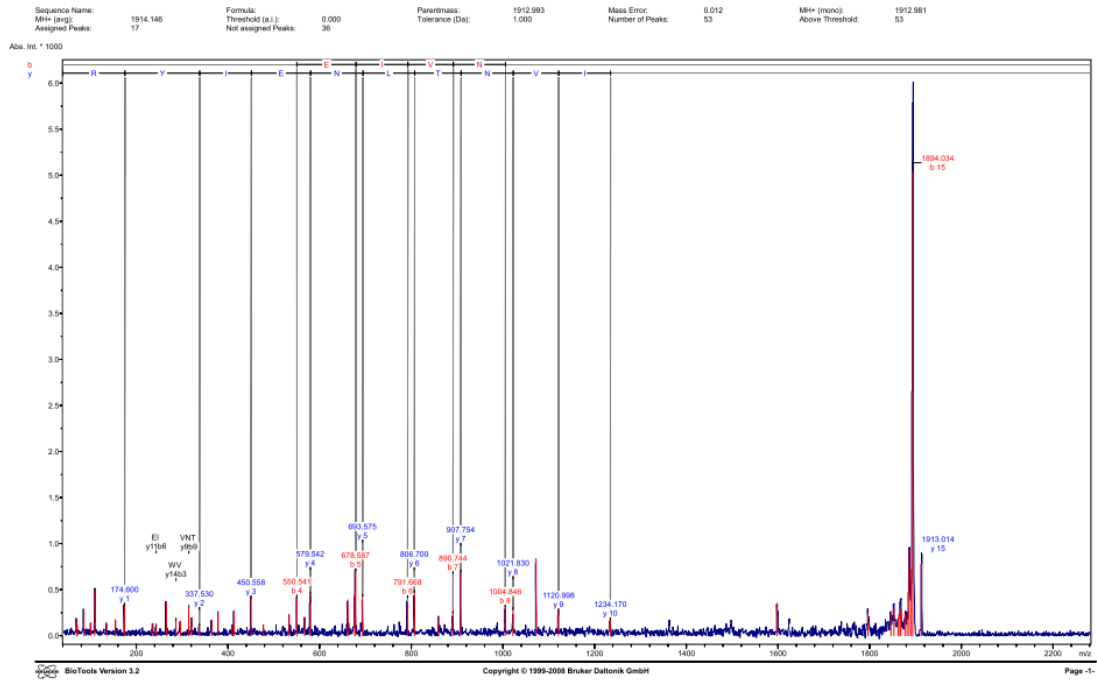

(A)

Display Parameter:  
 Parentmass: 1912.993  
 Tolerance (Da): 1.000  
 Mass Error: 0.012  
 Number of Peaks: 53  
 M<sup>+</sup> (mono): 1912.981  
 Above Threshold: 53  
 M<sup>+</sup> (avg): 1914.146  
 Assigned Peaks: 17  
 Threshold (a.i.): 0.000  
 Not assigned Peaks: 36

| Peak | Mass     | Intensity | Peak | Mass     | Intensity | Peak | Mass     | Intensity | Peak | Mass     | Intensity | Peak | Mass     | Intensity |
|------|----------|-----------|------|----------|-----------|------|----------|-----------|------|----------|-----------|------|----------|-----------|
| 1    | 89.211   | 177.178   | 1    | 71.229   | 113.841   | 8    | 85.728   | 275.903   | 100  | 100.950  | 126.241   | 8    | 169.629  | 438.680   |
| 2    | 158.202  | 177.986   | 2    | 174.606  | 331.418   | 9    | 258.243  | 131.174   | 10   | 283.213  | 97.481    | 11   | 295.520  | 470.430   |
| 3    | 186.493  | 197.950   | 3    | 174.606  | 314.826   | 10   | 437.324  | 239.823   | 11   | 437.324  | 239.823   | 12   | 437.324  | 239.823   |
| 13   | 409.541  | 134.811   | 20   | 413.541  | 211.790   | 21   | 460.580  | 433.889   | 22   | 477.989  | 118.181   | 23   | 533.927  | 229.243   |
| 24   | 579.574  | 265.059   | 28   | 579.574  | 459.114   | 34   | 651.953  | 389.459   | 35   | 676.954  | 445.920   | 36   | 676.954  | 219.217   |
| 33   | 761.824  | 389.344   | 33   | 808.700  | 485.600   | 33   | 859.689  | 213.521   | 34   | 860.744  | 238.532   | 35   | 860.744  | 686.650   |
| 38   | 1041.839 | 219.344   | 38   | 1079.864 | 879.824   | 38   | 1100.989 | 264.384   | 39   | 1254.116 | 199.029   | 41   | 1254.116 | 368.888   |
| 43   | 1348.020 | 268.868   | 43   | 1352.879 | 333.774   | 45   | 1382.209 | 193.330   | 46   | 1505.800 | 204.931   | 47   | 1508.161 | 1879.845  |
| 48   | 1581.868 | 230.731   | 48   | 1608.749 | 323.689   | 51   | 1660.841 | 219.413   | 51   | 1664.054 | 3026.321  | 53   | 1912.981 | 188.774   |

Calculated Masses:  
 RYLIENLTYNIV

| R1-term | Ion | a        | b        | y        | C1-term | Ion |
|---------|-----|----------|----------|----------|---------|-----|
| 1       | Y   | 72.850   | 102.050  | 178.119  | 16      | R   |
| 2       | W   | 269.130  | 289.130  | 338.182  | 16      | Y   |
| 3       | Y   | 389.200  | 389.200  | 481.289  | 19      | L   |
| 4       | Y   | 529.271  | 529.271  | 630.393  | 15      | E   |
| 5       | L   | 651.314  | 679.329  | 684.352  | 11      | N   |
| 6       | Y   | 749.388  | 749.388  | 817.429  | 10      | L   |
| 7       | Y   | 877.429  | 877.429  | 958.484  | 9       | N   |
| 8       | N   | 877.429  | 1005.504 | 1022.527 | 9       | N   |
| 9       | L   | 1074.495 | 1138.595 | 1174.595 | 9       | Y   |
| 10      | L   | 1192.611 | 1218.630 | 1234.673 | 6       | L   |
| 11      | N   | 1329.650 | 1333.674 | 1363.673 | 5       | Y   |
| 12      | E   | 1429.720 | 1489.720 | 1509.769 | 4       | Y   |
| 13      | L   | 1527.810 | 1533.809 | 1553.810 | 3       | Y   |
| 14      | Y   | 1719.879 | 1726.899 | 1811.933 | 2       | W   |
| 15      | R   | 1866.970 | 1924.970 | 1912.981 | 1       | R   |

Copyright © 1999-2008 Bruker Daltonik GmbH

(B)

Figure S28. Annotated MS/MS spectrum of ion 1912.993 m/z detected in area #8. (A) MS/MS spectrum; (B) Peak list and amino acid sequence.

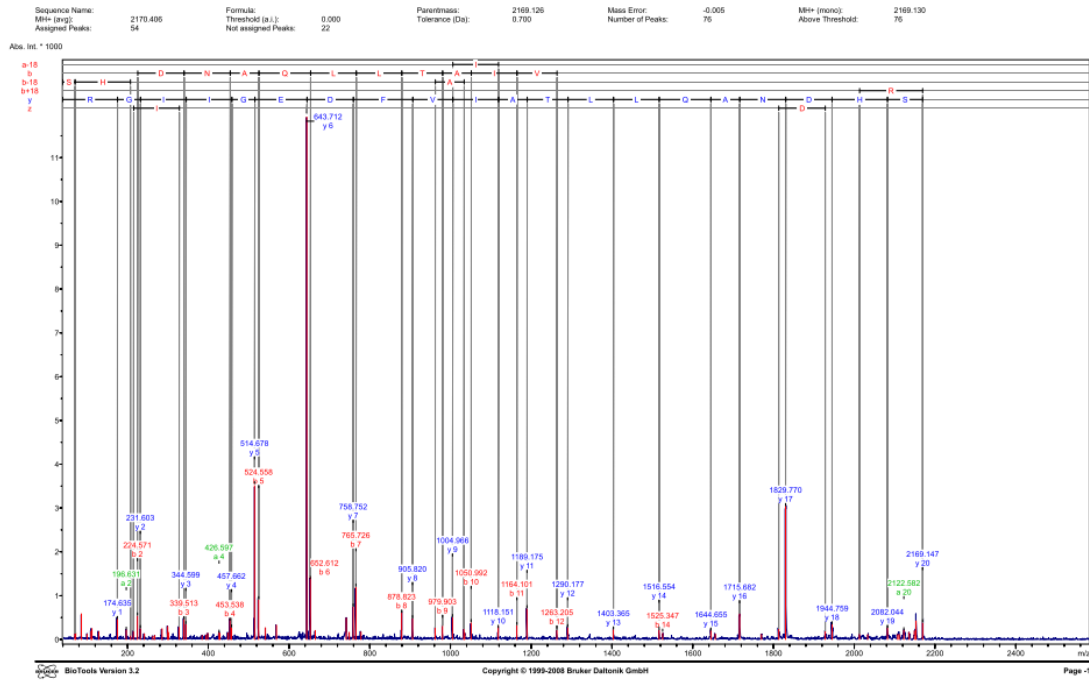

(A)

Display Parameter:   
 Parentmass: 2169.126   
 Tolerance (Da): 0.700   
 Mass Error: -0.005   
 Number of Peaks: 76   
 M<sup>+</sup> (mono): 2169.130   
 Above Threshold: 76   
 M<sup>+</sup> (avg): 2170.486   
 Assigned Peaks: 54   
 Threshold (a.i.): 0.000   
 Not assigned Peaks: 22

| Peak | Mass     | Intensity | Peak | Mass     | Intensity | Peak | Mass     | Intensity | Peak | Mass     | Intensity | Peak | Mass     | Intensity |
|------|----------|-----------|------|----------|-----------|------|----------|-----------|------|----------|-----------|------|----------|-----------|
| 8    | 89.711   | 142.108   | 7    | 71.250   | 183.930   | 3    | 85.943   | 585.238   | 4    | 99.703   | 126.702   | 5    | 169.702  | 188.885   |
| 13   | 138.859  | 177.808   | 11   | 174.835  | 477.474   | 10   | 185.911  | 292.858   | 11   | 207.858  | 39.011    | 17   | 212.909  | 358.874   |
| 15   | 201.803  | 258.894   | 14   | 247.862  | 355.354   | 15   | 259.831  | 75.988    | 16   | 287.830  | 152.959   | 18   | 292.917  | 437.850   |
| 18   | 301.803  | 190.809   | 20   | 327.807  | 288.803   | 21   | 339.813  | 473.800   | 22   | 344.805  | 201.900   | 23   | 384.827  | 31.933    |
| 24   | 388.869  | 131.801   | 26   | 426.897  | 305.832   | 27   | 438.862  | 135.868   | 28   | 448.839  | 133.859   | 29   | 458.833  | 222.858   |
| 31   | 514.878  | 3548.871  | 33   | 524.858  | 323.825   | 32   | 529.837  | 287.833   | 34   | 568.864  | 328.802   | 35   | 643.917  | 1202.813  |
| 37   | 624.869  | 205.850   | 38   | 641.874  | 409.814   | 39   | 658.876  | 163.818   | 40   | 688.874  | 793.864   | 41   | 763.924  | 1026.842  |
| 43   | 679.893  | 622.892   | 44   | 808.830  | 484.809   | 45   | 881.809  | 272.810   | 46   | 879.803  | 317.800   | 47   | 1003.860 | 812.837   |
| 49   | 1034.889 | 154.899   | 50   | 1056.896 | 307.878   | 51   | 1118.931 | 309.895   | 52   | 1164.911 | 333.833   | 53   | 1198.918 | 718.832   |
| 55   | 1280.177 | 281.868   | 56   | 1420.885 | 242.898   | 57   | 1518.924 | 228.839   | 58   | 1625.847 | 142.865   | 59   | 1644.865 | 418.898   |
| 61   | 1673.846 | 800.808   | 62   | 1759.864 | 106.819   | 63   | 1828.912 | 23.835    | 64   | 1854.878 | 189.844   | 65   | 1892.892 | 358.848   |
| 67   | 2012.899 | 139.897   | 68   | 2033.903 | 113.899   | 69   | 2080.944 | 79.888    | 70   | 2107.948 | 191.841   | 71   | 2140.970 | 114.858   |
| 73   | 2138.895 | 165.840   | 74   | 2148.875 | 188.822   | 75   | 2162.922 | 423.816   | 76   | 2169.126 | 394.962   |      |          |           |

Calculated Masses:   
 SENEQUALKTFEELGIGR

| M.Yeem | Ion | a       | a-17    | a-15    | b        | b-17     | b-15     | c        | x        | y        | z        | O.Yeem   | Ym       |    |
|--------|-----|---------|---------|---------|----------|----------|----------|----------|----------|----------|----------|----------|----------|----|
| 1      | S   | 89.711  | 28.111  | 48.004  | 88.803   | 71.253   | 79.822   | 106.002  | 155.002  | 160.014  | 201.008  | 175.113  | 158.002  | 26 |
| 2      | H   | 127.127 | 97.027  | 119.005 | 225.803  | 208.823  | 217.888  | 244.108  | 293.128  | 318.071  | 368.106  | 292.145  | 215.116  | 29 |
| 3      | D   | 174.154 | 144.054 | 166.032 | 272.830  | 255.850  | 264.915  | 291.135  | 340.155  | 365.109  | 415.144  | 339.183  | 262.188  | 32 |
| 4      | N   | 221.181 | 191.081 | 213.059 | 320.857  | 303.877  | 312.942  | 339.162  | 388.182  | 397.247  | 447.282  | 371.321  | 314.324  | 35 |
| 5      | A   | 268.208 | 238.108 | 260.086 | 368.884  | 351.904  | 360.969  | 387.189  | 436.209  | 445.274  | 495.309  | 419.348  | 357.351  | 38 |
| 6      | Q   | 315.235 | 285.135 | 307.113 | 416.911  | 399.931  | 408.996  | 435.216  | 484.236  | 493.301  | 543.336  | 467.375  | 404.378  | 41 |
| 7      | L   | 362.262 | 332.162 | 354.140 | 464.938  | 447.958  | 456.023  | 482.243  | 531.263  | 540.328  | 590.363  | 514.402  | 451.405  | 44 |
| 8      | L   | 409.289 | 379.189 | 401.167 | 512.965  | 495.985  | 504.050  | 530.270  | 579.290  | 588.355  | 638.390  | 562.429  | 498.432  | 47 |
| 9      | L   | 456.316 | 426.216 | 448.194 | 560.992  | 543.012  | 551.077  | 577.297  | 626.317  | 635.382  | 685.417  | 609.456  | 544.459  | 50 |
| 10     | A   | 503.343 | 473.243 | 495.221 | 608.019  | 591.039  | 600.104  | 626.324  | 675.344  | 684.409  | 734.444  | 658.483  | 594.486  | 53 |
| 11     | L   | 550.370 | 520.270 | 542.248 | 656.046  | 639.066  | 647.131  | 673.351  | 722.371  | 731.436  | 781.471  | 705.510  | 640.513  | 56 |
| 12     | V   | 597.397 | 567.297 | 589.275 | 704.073  | 687.093  | 695.158  | 721.378  | 770.398  | 779.463  | 829.508  | 753.547  | 687.550  | 59 |
| 13     | L   | 644.424 | 614.324 | 636.302 | 752.100  | 735.120  | 743.185  | 769.405  | 818.425  | 827.490  | 877.535  | 801.574  | 735.577  | 62 |
| 14     | L   | 691.451 | 661.351 | 683.329 | 800.127  | 783.147  | 791.212  | 817.432  | 866.452  | 875.517  | 925.562  | 849.601  | 782.604  | 65 |
| 15     | E   | 738.478 | 708.378 | 730.356 | 848.154  | 831.174  | 839.239  | 865.459  | 914.479  | 923.544  | 973.589  | 897.628  | 829.631  | 68 |
| 16     | L   | 785.505 | 755.405 | 777.383 | 896.181  | 879.201  | 887.266  | 913.486  | 962.506  | 971.571  | 1021.616 | 945.655  | 876.658  | 71 |
| 17     | I   | 832.532 | 802.432 | 824.410 | 944.208  | 927.228  | 935.293  | 961.513  | 1010.533 | 1019.598 | 1069.643 | 993.682  | 917.685  | 74 |
| 18     | L   | 879.559 | 849.459 | 871.437 | 992.235  | 975.255  | 983.320  | 1009.540 | 1058.560 | 1067.625 | 1117.670 | 1041.709 | 965.712  | 77 |
| 19     | L   | 926.586 | 896.486 | 918.464 | 1040.262 | 1023.282 | 1031.347 | 1057.567 | 1106.587 | 1115.652 | 1165.697 | 1089.736 | 1013.739 | 80 |
| 20     | R   | 973.613 | 943.513 | 965.491 | 1088.289 | 1071.309 | 1079.374 | 1105.594 | 1154.614 | 1163.679 | 1213.724 | 1137.763 | 1061.766 | 83 |

Copyright © 1999-2008 Bruker Daltonik GmbH

(B)

Figure S29. Annotated MS/MS spectrum of ion 2169.126 m/z detected in area #8. (A) MS/MS spectrum; (B) Peak list and amino acid sequence.

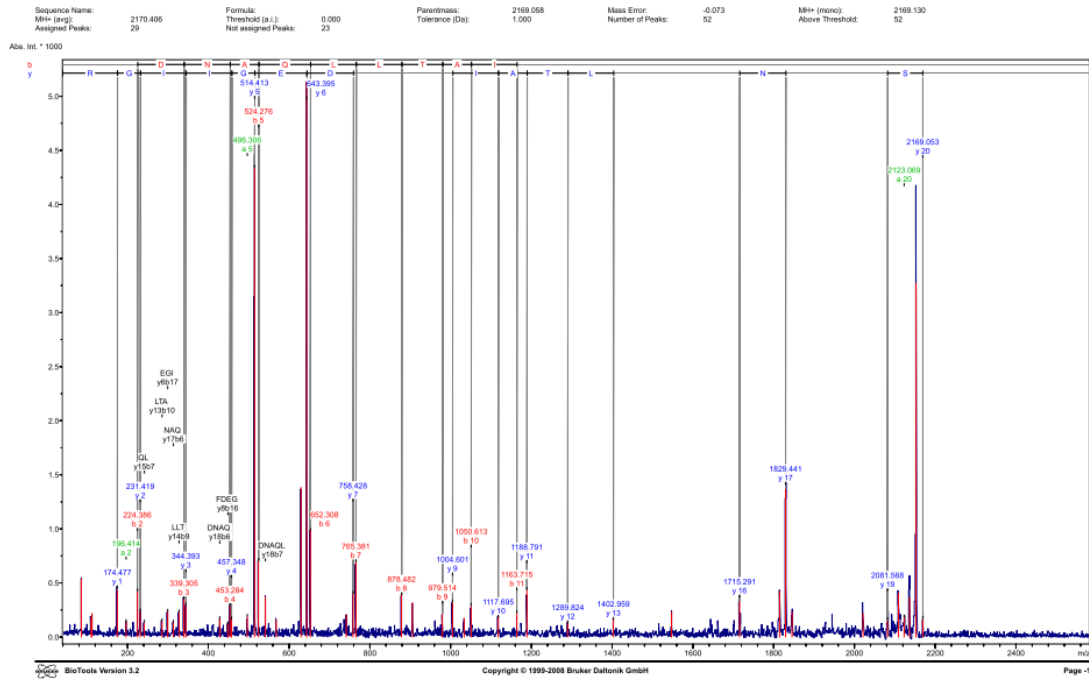

(A)

Display Parameter: Parentmass: 2169.058, Mass Error: -0.073, M+H (mono): 2169.130, M+H (avg): 2170.486, Threshold (a.i.): 0.000, Tolerance (Da): 1.000, Number of Peaks: 52, Above Threshold: 52, Assigned Peaks: 29, Not assigned Peaks: 23

| Peak | Mass     | Intensity | Peak | Mass     | Intensity | Peak | Mass     | Intensity | Peak | Mass     | Intensity | Peak | Mass     | Intensity |
|------|----------|-----------|------|----------|-----------|------|----------|-----------|------|----------|-----------|------|----------|-----------|
| 1    | 85.090   | 936.295   | 1    | 109.560  | 17.281    | 1    | 11.530   | 210.265   | 1    | 174.477  | 45.644    | 1    | 224.386  | 224.386   |
| 2    | 231.419  | 237.341   | 2    | 241.407  | 134.020   | 2    | 285.292  | 145.981   | 10   | 289.364  | 232.820   | 11   | 313.320  | 334.413   |
| 3    | 339.309  | 374.199   | 3    | 344.393  | 439.189   | 3    | 359.289  | 187.184   | 11   | 449.465  | 113.339   | 12   | 489.402  | 489.402   |
| 10   | 496.393  | 187.189   | 20   | 514.413  | 439.189   | 21   | 524.276  | 305.359   | 22   | 541.335  | 373.419   | 23   | 568.372  | 597.736   |
| 20   | 653.414  | 329.781   | 24   | 656.306  | 1029.119  | 24   | 751.431  | 205.769   | 26   | 756.424  | 297.770   | 25   | 793.321  | 715.359   |
| 33   | 805.414  | 319.189   | 33   | 829.544  | 214.420   | 33   | 1004.601 | 191.040   | 34   | 1033.575 | 174.513   | 35   | 1059.613 | 106.188   |
| 36   | 1189.419 | 229.878   | 39   | 1189.561 | 405.084   | 39   | 1266.041 | 169.065   | 40   | 1282.069 | 169.284   | 41   | 1481.124 | 230.343   |
| 43   | 1514.702 | 429.540   | 44   | 1529.441 | 1373.295  | 45   | 1545.113 | 230.133   | 46   | 2081.492 | 419.077   | 47   | 2091.509 | 155.950   |
| 49   | 2123.069 | 181.984   | 50   | 2136.061 | 364.404   | 51   | 2162.408 | 209.669   | 52   | 2169.053 | 167.920   |      |          |           |

Calculated Masses: SPINAGLTAATFDGIGR

| N-Term | Ion | a        | b        | y        | C-Term | Ion |
|--------|-----|----------|----------|----------|--------|-----|
| 1      | B   | 160.044  | 18.030   | 178.113  | 20     | R   |
| 2      | H   | 182.103  | 239.089  | 331.481  | 19     | D   |
| 3      | D   | 114.130  | 346.123  | 345.224  | 18     | I   |
| 4      | A   | 46.177   | 454.166  | 456.369  | 16     | G   |
| 5      | A   | 482.810  | 456.369  | 458.359  | 16     | G   |
| 6      | D   | 426.260  | 463.264  | 464.273  | 15     | E   |
| 7      | L   | 458.369  | 465.341  | 467.400  | 15     | D   |
| 8      | L   | 452.437  | 479.432  | 480.465  | 13     | F   |
| 9      | L   | 464.456  | 489.487  | 490.500  | 14     | F   |
| 10     | A   | 1023.322 | 1051.517 | 1118.620 | 11     | I   |
| 11     | I   | 1136.620 | 1168.661 | 1189.694 | 10     | A   |
| 12     | V   | 1238.672 | 1293.899 | 1296.723 | 9      | I   |
| 13     | R   | 147.174  | 147.174  | 147.174  | 9      | L   |
| 14     | D   | 482.770  | 1545.120 | 1487.899 | 9      | L   |
| 15     | E   | 1626.810 | 1654.807 | 1641.932 | 8      | A   |
| 16     | G   | 1619.836 | 1711.811 | 1715.969 | 8      | A   |
| 17     | I   | 1768.910 | 1824.913 | 1838.912 | 7      | N   |
| 18     | L   | 1819.926 | 1897.977 | 1924.979 | 7      | N   |
| 19     | G   | 1867.992 | 1956.110 | 2002.083 | 7      | H   |
| 20     | R   | 372.124  | 2111.113 | 2169.103 |        |     |

BioTools Version 3.2 Copyright © 1999-2008 Bruker Daltonik GmbH Page 2-

(B)

Figure S30. Annotated MS/MS spectrum of ion 2169.058 m/z detected in area #8. (A) MS/MS spectrum; (B) Peak list and amino acid sequence.

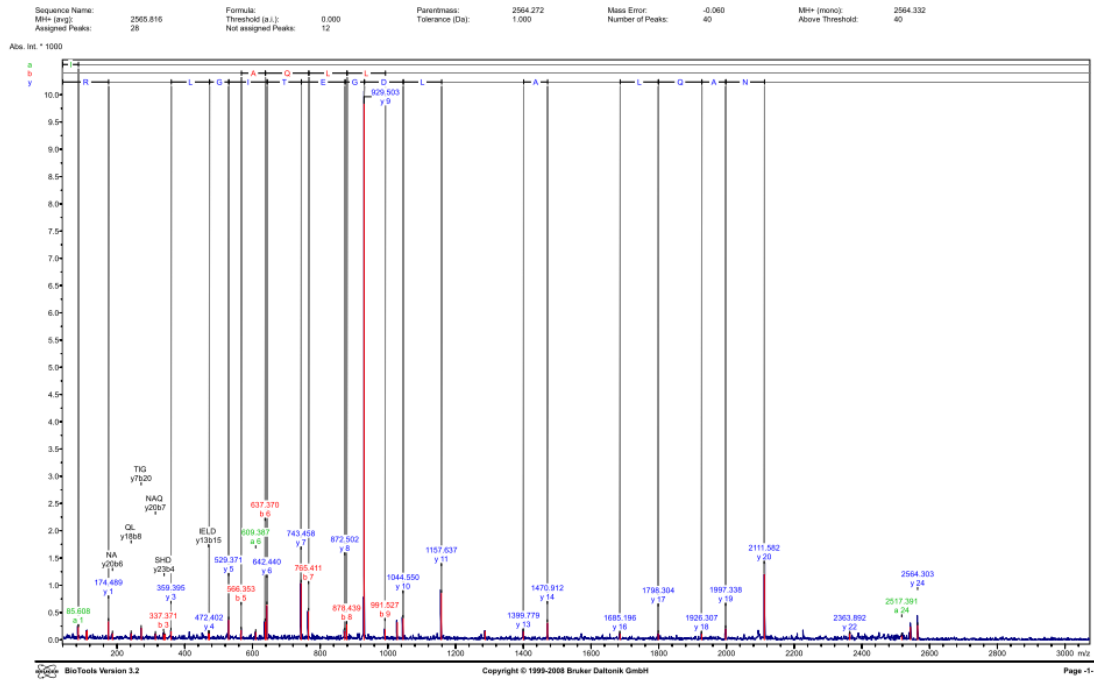

(A)

Display Parameter: Parentmass: 2564.272 Mass Error: -0.060 MH+ (mono): 2564.332 MH+ (avg): 2565.816 Threshold (a.l.): 0.000  
 Tolerance (Da): 1.000 Number of Peaks: 40 Above Threshold: 40 Assigned Peaks: 28 Not assigned Peaks: 12

| Peak | Mass     | Intensity | Peak | Mass     | Intensity | Peak | Mass     | Intensity | Peak | Mass     | Intensity | Peak | Mass     | Intensity | Peak | Mass     | Intensity |
|------|----------|-----------|------|----------|-----------|------|----------|-----------|------|----------|-----------|------|----------|-----------|------|----------|-----------|
| 1    | 85.058   | 0.1       | 2    | 174.489  | 1.1       | 3    | 350.395  | 0.3       | 4    | 472.402  | 0.4       | 5    | 529.371  | 1.5       | 6    | 566.353  | 0.5       |
| 7    | 637.379  | 2.5       | 8    | 642.460  | 1.5       | 9    | 743.458  | 1.8       | 10   | 765.411  | 1.0       | 11   | 829.503  | 10.0      | 12   | 872.502  | 1.8       |
| 13   | 1044.550 | 1.0       | 14   | 1157.637 | 1.5       | 15   | 1399.779 | 0.5       | 16   | 1470.812 | 1.0       | 17   | 1605.195 | 0.5       | 18   | 1798.304 | 0.8       |
| 19   | 1926.307 | 0.5       | 20   | 1997.338 | 0.8       | 21   | 2111.582 | 1.5       | 22   | 2363.892 | 0.5       | 23   | 2517.391 | 0.5       | 24   | 2564.303 | 1.0       |

Calculated Masses:  
 ISHDNAQLLTAELDDGETGLANR

| b  | Ion | a        | b        | y        | C  | Ion |
|----|-----|----------|----------|----------|----|-----|
| 1  | L   | 85.058   | 114.020  | 175.139  | 2  | R   |
| 2  | L   | 174.489  | 211.971  | 259.159  | 3  | R   |
| 3  | H   | 310.181  | 338.182  | 365.191  | 22 | A   |
| 4  | N   | 420.710  | 453.321  | 473.321  | 7  | L   |
| 5  | N   | 529.371  | 567.352  | 583.352  | 20 | G   |
| 6  | L   | 612.256  | 632.256  | 633.256  | 18 | L   |
| 7  | L   | 725.323  | 765.343  | 744.458  | 18 | L   |
| 8  | L   | 829.503  | 872.452  | 872.452  | 17 | L   |
| 9  | L   | 829.503  | 872.458  | 872.458  | 18 | L   |
| 10 | L   | 1044.550 | 1043.201 | 1045.207 | 19 | D   |
| 11 | A   | 1157.637 | 1142.891 | 1158.611 | 14 | L   |
| 12 | L   | 1242.650 | 1277.650 | 1287.652 | 13 | E   |
| 13 | L   | 1379.733 | 1408.734 | 1409.728 | 12 | L   |
| 14 | L   | 1497.812 | 1519.813 | 1471.723 | 11 | A   |
| 15 | L   | 1605.195 | 1630.195 | 1572.709 | 10 | L   |
| 16 | L   | 1605.195 | 1631.201 | 1635.207 | 9  | L   |
| 17 | E   | 1707.430 | 1724.300 | 1718.391 | 8  | L   |
| 18 | L   | 1825.850 | 1821.850 | 1827.063 | 7  | Q   |
| 19 | L   | 2007.030 | 2035.031 | 1991.067 | 6  | A   |
| 20 | L   | 2095.051 | 2095.051 | 2125.302 | 5  | L   |
| 21 | A   | 2174.140 | 2205.140 | 2227.150 | 4  | D   |
| 22 | A   | 2248.150 | 2278.151 | 2284.153 | 3  | L   |
| 23 | N   | 2302.220 | 2330.220 | 2341.241 | 2  | B   |
| 24 | R   | 2518.320 | 2520.321 | 2544.331 | 1  | L   |

Copyright © 1999-2008 Bruker Daltonik GmbH

(B)

Figure S31. Annotated MS/MS spectrum of ion 2564.272 m/z detected in area #8. (A) MS/MS spectrum; (B) Peak list and amino acid sequence.

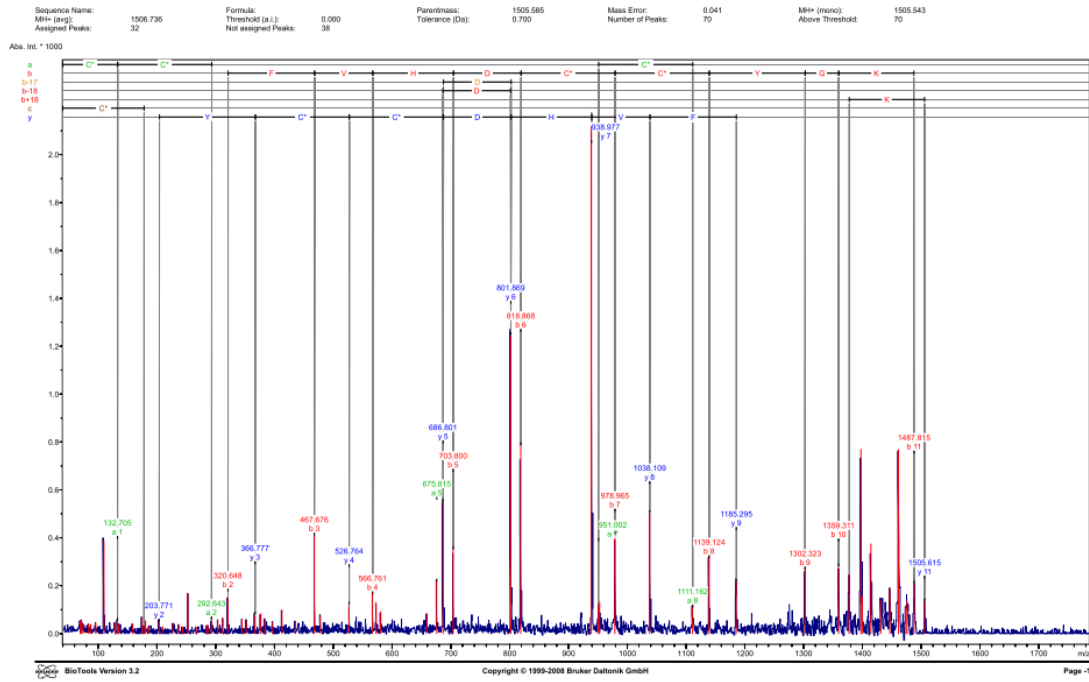

(A)

Display Parameter:  
 Parentmass: 1505.585  
 Tolerance (Da): 0.700  
 Mass Error: 0.041  
 Number of Peaks: 70  
 M+ (mono): 1505.543  
 Above Threshold: 70  
 M+ (avg): 1506.736  
 Assigned Peaks: 32  
 Threshold (a.i.): 0.000  
 Not assigned Peaks: 36

| Peak | Mass     | Intensity | Peak | Mass     | Intensity | Peak | Mass     | Intensity | Peak | Mass     | Intensity | Peak | Mass     | Intensity |
|------|----------|-----------|------|----------|-----------|------|----------|-----------|------|----------|-----------|------|----------|-----------|
| 1    | 69.853   | 26.001    | 71   | 79.971   | 142.111   | 73   | 82.029   | 133.063   | 75   | 90.113   | 133.063   | 77   | 98.160   | 45.828    |
| 11   | 109.125  | 386.255   | 81   | 139.786  | 45.443    | 83   | 147.783  | 34.259    | 85   | 156.780  | 22.460    | 87   | 165.777  | 20.223    |
| 13   | 227.052  | 42.787    | 91   | 236.742  | 33.840    | 93   | 245.739  | 29.717    | 95   | 254.736  | 186.510   | 97   | 263.733  | 34.771    |
| 21   | 286.824  | 33.026    | 101  | 296.521  | 31.959    | 103  | 305.518  | 27.836    | 105  | 314.515  | 65.953    | 107  | 323.512  | 59.755    |
| 31   | 351.763  | 52.919    | 111  | 361.777  | 39.490    | 113  | 370.774  | 35.367    | 115  | 379.771  | 83.721    | 117  | 388.768  | 89.197    |
| 33   | 435.499  | 15.569    | 121  | 445.513  | 14.498    | 123  | 454.510  | 14.375    | 125  | 463.507  | 149.924   | 127  | 472.504  | 123.682   |
| 41   | 480.070  | 40.805    | 131  | 490.084  | 35.679    | 133  | 499.081  | 31.556    | 135  | 508.078  | 550.033   | 137  | 517.075  | 121.767   |
| 43   | 518.883  | 189.766   | 141  | 528.897  | 212.779   | 143  | 537.894  | 192.653   | 145  | 546.891  | 139.441   | 147  | 555.888  | 138.239   |
| 51   | 1111.162 | 120.133   | 151  | 1121.177 | 105.584   | 153  | 1130.174 | 116.538   | 155  | 1139.171 | 278.421   | 157  | 1148.168 | 248.339   |
| 53   | 1185.285 | 189.766   | 161  | 1195.190 | 175.229   | 163  | 1204.187 | 186.183   | 165  | 1213.184 | 142.460   | 167  | 1222.181 | 141.258   |
| 61   | 1287.413 | 703.311   | 171  | 1297.427 | 583.269   | 173  | 1306.424 | 503.223   | 175  | 1315.421 | 142.900   | 177  | 1324.418 | 708.871   |
| 63   | 1413.453 | 109.805   | 181  | 1423.467 | 117.661   | 183  | 1432.464 | 127.615   | 185  | 1441.461 | 137.569   | 187  | 1450.458 | 136.367   |

Calculated Masses:  
 CDFWDCYGR: 1: Carbanisomethyl (C) 2: Carbanisomethyl (C) 3: Carbanisomethyl (C) 6: Carbanisomethyl (C)

| 16-Term | 16m | a        | a-17     | a-18     | b        | b-17     | b-18     | b+18     | c        | y        | z        | C-term   | 16m |     |
|---------|-----|----------|----------|----------|----------|----------|----------|----------|----------|----------|----------|----------|-----|-----|
| 1       | C   | 132.042  | 116.110  | 115.063  | 517.333  | 142.111  | 175.324  | 132.042  | 133.063  | 133.063  | 133.063  | 133.063  | 11  | 69  |
| 2       | C   | 253.074  | 236.942  | 235.063  | 324.555  | 324.555  | 324.555  | 324.555  | 324.555  | 324.555  | 324.555  | 324.555  | 12  | 81  |
| 3       | C   | 485.170  | 468.138  | 466.189  | 588.374  | 588.374  | 588.374  | 588.374  | 588.374  | 588.374  | 588.374  | 588.374  | 13  | 93  |
| 4       | V   | 678.265  | 661.233  | 659.284  | 779.311  | 779.311  | 779.311  | 779.311  | 779.311  | 779.311  | 779.311  | 779.311  | 14  | 105 |
| 5       | H   | 871.360  | 854.328  | 852.379  | 963.338  | 963.338  | 963.338  | 963.338  | 963.338  | 963.338  | 963.338  | 963.338  | 15  | 117 |
| 6       | D   | 1064.455 | 1047.423 | 1045.474 | 1159.351 | 1159.351 | 1159.351 | 1159.351 | 1159.351 | 1159.351 | 1159.351 | 1159.351 | 16  | 129 |
| 7       | C   | 1257.550 | 1240.518 | 1238.569 | 1355.369 | 1355.369 | 1355.369 | 1355.369 | 1355.369 | 1355.369 | 1355.369 | 1355.369 | 17  | 141 |
| 8       | V   | 1450.645 | 1433.613 | 1431.664 | 1551.382 | 1551.382 | 1551.382 | 1551.382 | 1551.382 | 1551.382 | 1551.382 | 1551.382 | 18  | 153 |
| 9       | K   | 1643.740 | 1626.708 | 1624.759 | 1757.401 | 1757.401 | 1757.401 | 1757.401 | 1757.401 | 1757.401 | 1757.401 | 1757.401 | 19  | 165 |

BioTools Version 3.2 Copyright © 1999-2008 Bruker Daltonik GmbH Page 2-

(B)

Figure S32. Annotated MS/MS spectrum of ion 1505.585 m/z detected in area #9. (A) MS/MS spectrum; (B) Peak list and amino acid sequence.



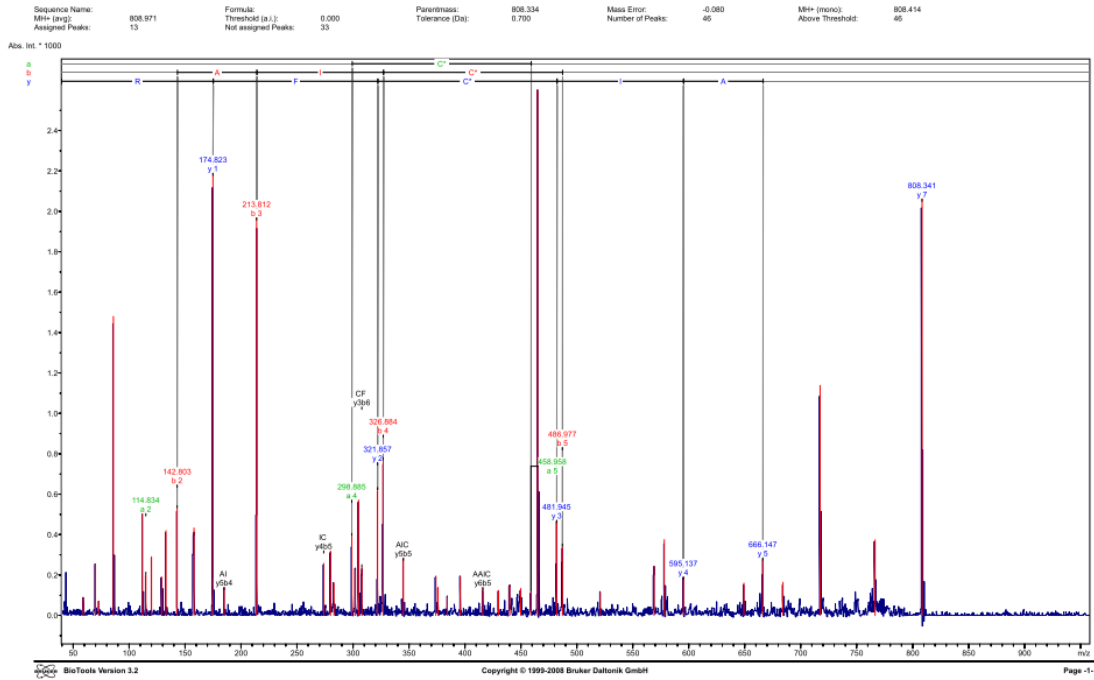

(A)

Display Parameter:   
 Parentmass: 808.334   
 Mass Error: -0.080   
 M+ (mono): 808.414   
 M+ (avg): 808.871   
 Threshold (a.l.): 0.000   
 Tolerance (Da): 0.700   
 Number of Peaks: 46   
 Above Threshold: 46   
 Assigned Peaks: 13   
 Not assigned Peaks: 33

| Peak | Mass    | Intensity | Peak | Mass    | Intensity | Peak | Mass    | Intensity | Peak | Mass    | Intensity | Peak | Mass    | Intensity | Peak | Mass    | Intensity |
|------|---------|-----------|------|---------|-----------|------|---------|-----------|------|---------|-----------|------|---------|-----------|------|---------|-----------|
| 1    | 58.800  | 89.748    | 1    | 66.834  | 251.261   | 3    | 72.820  | 89.701    | 1    | 82.807  | 449.021   | 3    | 111.822 | 519.219   | 11   | 114.834 | 299.201   |
| 2    | 118.801 | 280.811   | 3    | 132.834 | 181.112   | 19   | 152.772 | 419.814   | 10   | 182.803 | 530.372   | 11   | 197.810 | 432.288   | 12   | 174.823 | 2189.809  |
| 10   | 144.814 | 139.046   | 11   | 213.834 | 1699.424  | 15   | 273.823 | 297.885   | 14   | 298.885 | 119.820   | 17   | 299.890 | 781.452   | 18   | 298.885 | 389.124   |
| 18   | 307.885 | 235.046   | 20   | 304.880 | 841.924   | 21   | 387.784 | 238.890   | 22   | 347.889 | 821.000   | 23   | 368.880 | 787.380   | 24   | 344.842 | 284.309   |
| 25   | 318.819 | 124.524   | 28   | 378.808 | 163.024   | 31   | 383.820 | 89.110    | 30   | 395.851 | 193.241   | 32   | 413.814 | 138.332   | 33   | 430.840 | 173.258   |
| 31   | 438.814 | 157.620   | 32   | 448.811 | 143.823   | 33   | 458.808 | 139.811   | 34   | 464.821 | 2821.568  | 35   | 481.843 | 471.043   | 36   | 486.877 | 549.829   |
| 41   | 632.869 | 118.981   | 42   | 668.804 | 48.184    | 43   | 683.809 | 14.824    | 44   | 688.729 | 189.211   | 41   | 842.110 | 199.844   | 45   | 686.141 | 214.824   |
| 43   | 684.119 | 164.988   | 44   | 717.868 | 170.081   | 45   | 735.911 | 373.820   | 46   | 808.341 | 2051.750  |      |         |           |      |         |           |

Calculated Masses:   
 AAACFR S: Carbamidomethyl (C)

| M.Term | Seq | a       | b       | y       | C.Term | Seq |
|--------|-----|---------|---------|---------|--------|-----|
| 1      | A   | 114.834 | 213.812 | 307.885 | R      |     |
| 2      | A   | 118.837 | 142.803 | 322.187 | F      |     |
| 3      | A   | 158.112 | 214.148 | 489.424 | F      |     |
| 4      | I   | 229.220 | 337.223 | 588.302 | F      |     |
| 5      | C   | 499.230 | 487.233 | 688.239 | A      |     |
| 6      | F   | 498.224 | 638.224 | 817.803 | A      |     |
| 7      | R   | 702.428 | 700.431 | 808.413 | A      |     |

BioTools Version 3.2 Copyright © 1999-2008 Bruker Daltonik GmbH Page -2-

(B)

Figure S33. Annotated MS/MS spectrum of ion 808.334 *m/z* detected in area #9. (A) MS/MS spectrum; (B) Peak list and amino acid sequence.

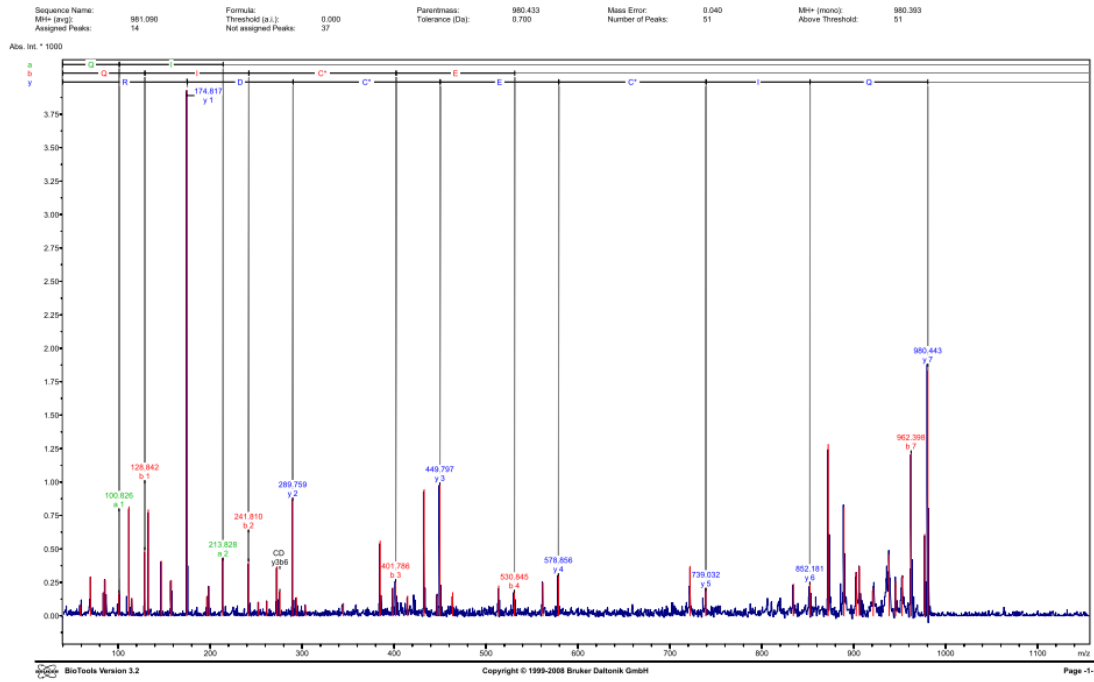

(A)

Display Parameter:   
 Parentmass: 980.433   
 Tolerance (Da): 0.700

Mass Error: 0.040   
 Number of Peaks: 51

MH+ (mono): 980.393   
 Above Threshold: 51

MH+ (avg): 981.090   
 Assigned Peaks: 14

Threshold (a.i.): 0.000   
 Not assigned Peaks: 37

**Peaks**

| Peak | Mass    | Intensity | Peak | Mass    | Intensity | Peak | Mass    | Intensity | Peak | Mass    | Intensity | Peak | Mass    | Intensity | Peak | Mass    | Intensity |
|------|---------|-----------|------|---------|-----------|------|---------|-----------|------|---------|-----------|------|---------|-----------|------|---------|-----------|
| 68   | 68.025  | 72.191    | 7    | 69.049  | 285.199   | 3    | 63.040  | 172.123   | 4    | 85.000  | 207.856   | 5    | 100.826 | 189.793   | 13   | 111.840 | 814.469   |
| 11   | 11.829  | 1.32698   | 2    | 178.024 | 411.144   | 8    | 107.074 | 26.308    | 10   | 148.103 | 237.839   | 11   | 157.859 | 405.424   | 12   | 174.817 | 401.129   |
| 13   | 138.005 | 147.985   | 14   | 158.784 | 213.828   | 15   | 213.828 | 433.000   | 16   | 241.810 | 456.621   | 17   | 259.793 | 107.150   | 18   | 261.736 | 119.253   |
| 19   | 212.750 | 374.985   | 20   | 272.720 | 180.400   | 21   | 289.780 | 881.951   | 22   | 292.814 | 136.527   | 23   | 303.777 | 76.634    | 24   | 344.493 | 97.324    |
| 25   | 358.769 | 507.858   | 26   | 368.825 | 219.943   | 27   | 371.860 | 622.903   | 28   | 415.707 | 153.853   | 29   | 439.763 | 253.903   | 30   | 456.817 | 159.355   |
| 31   | 448.707 | 995.191   | 32   | 483.820 | 118.345   | 33   | 513.859 | 242.074   | 34   | 530.845 | 187.811   | 35   | 581.890 | 248.136   | 36   | 578.858 | 269.654   |
| 37   | 717.054 | 316.411   | 38   | 749.036 | 268.119   | 39   | 824.974 | 238.074   | 40   | 882.913 | 259.741   | 41   | 874.744 | 182.249   | 42   | 889.799 | 814.864   |
| 43   | 892.028 | 342.489   | 44   | 906.149 | 388.063   | 45   | 941.159 | 187.060   | 46   | 938.130 | 457.087   | 47   | 945.650 | 553.816   | 48   | 952.431 | 307.189   |
| 49   | 956.393 | 124.460   | 50   | 971.171 | 628.919   | 51   | 980.433 | 450.184   |      |         |           |      |         |           |      |         |           |

**Calculated Masses**  
 ODCEDR3: Carbamidoethyl (C) 5: Carbamidoethyl (C)

| Residue | Ion | a       | b       | y       | C-Form | Ion |
|---------|-----|---------|---------|---------|--------|-----|
| 1       | D   | 102.074 | 129.068 | 178.113 | 7      | R   |
| 2       | I   | 214.150 | 243.150 | 293.160 | 6      | D   |
| 3       | E   | 374.180 | 402.181 | 458.177 | 5      | D'  |
| 4       | E   | 533.201 | 557.201 | 612.211 | 4      | E   |
| 5       | C'  | 693.231 | 721.231 | 776.242 | 3      | C'  |
| 6       | R   | 753.260 | 782.261 | 837.274 | 2      | R   |
| 7       | R   | 913.287 | 942.282 | 998.282 | 1      | D   |

BioTools Version 3.2 Copyright © 1999-2008 Bruker Daltonik GmbH Page 2-

(B)

Figure S34. Annotated MS/MS spectrum of ion 980.433 *m/z* detected in area #9. (A) MS/MS spectrum. (B) Peak list and amino acid sequence.

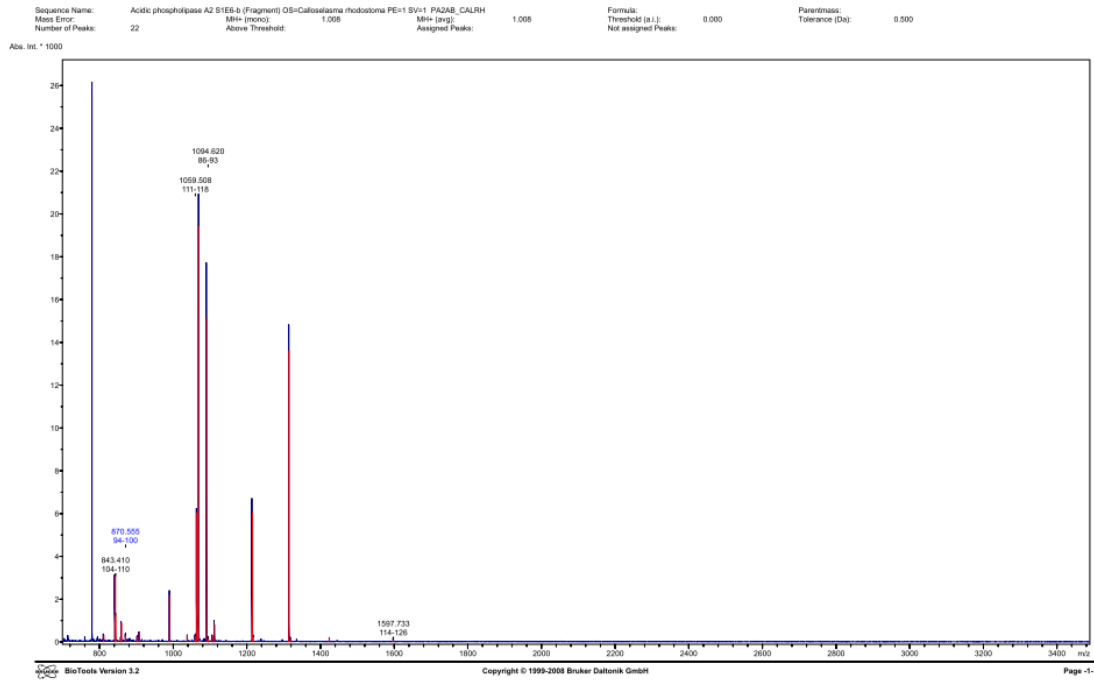

(A)

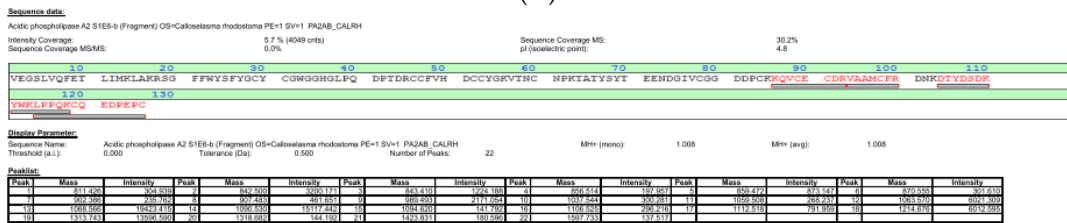

(B)

Figure S35. Annotated MS spectrum detected in area #9. (A) MS spectrum; (B) Peak list and sequence data.

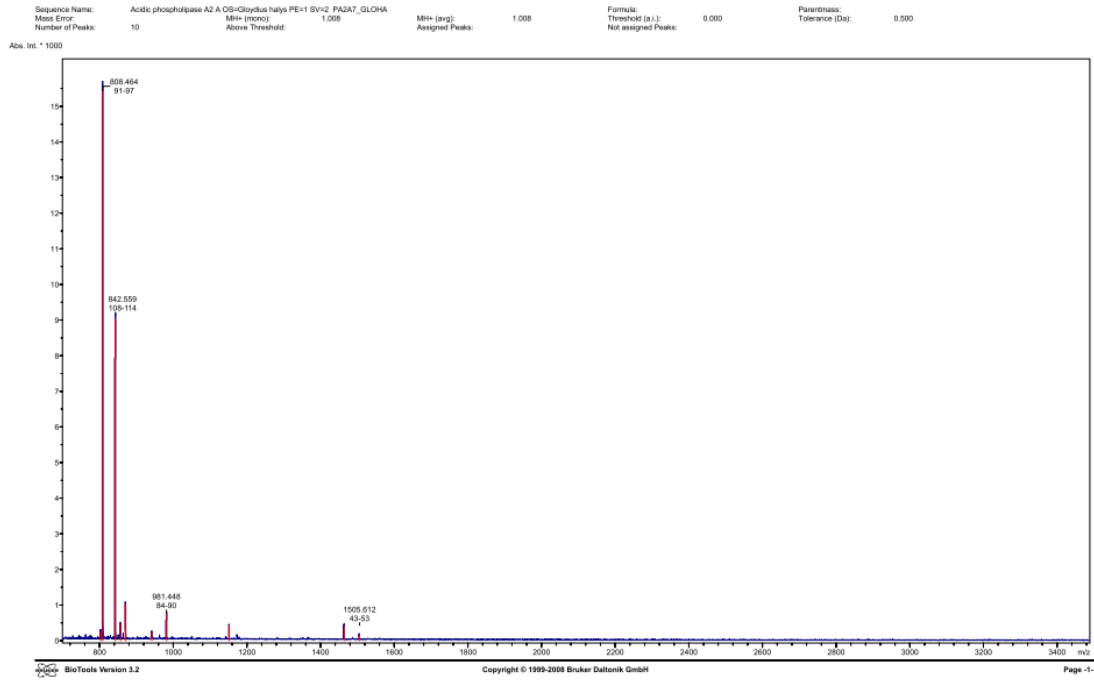

(A)

**Sequence data:**  
 Acidic phosphatase A2 A OS=Glycydus halys PE=1 SV=2 PAZAT\_GLOHA  
 Intensity Coverage: 90.0 % (25361 sites)  
 Sequence Coverage MS: 25.8%  
 Sequence Coverage MSMB: 0.0%  
 pI (isoelectric point): 4.7

|            |            |            |            |           |            |            |            |            |
|------------|------------|------------|------------|-----------|------------|------------|------------|------------|
| 10         | 20         | 30         | 40         | 50        | 60         | 70         | 80         | 90         |
| SLLQFETILM | KVARKSGMVW | YSNYGTCYCW | GGQGRPQDAT | DRCCFVHDC | YGRVIGCDPK | MDVYSFSEEN | GDIVCGGDDP | CKKEICECDR |
| 100        | 110        | 120        | 130        |           |            |            |            |            |
| AAATCRDNL  | NTYNDKFWA  | FGAKNCPQEE | SEPC       |           |            |            |            |            |

**Display Parameter:**  
 Sequence Name: Acidic phosphatase A2 A OS=Glycydus halys PE=1 SV=2 PAZAT\_GLOHA  
 Threshold (a.i.): 0.000  
 Tolerance (Da): 0.500  
 Number of Peaks: 10  
 MIt+ (mono): 1.008  
 MIt+ (avg): 1.008

**Peaklist:**

| Peak | Mass   | Intensity | Peak | Mass     | Intensity | Peak | Mass     | Intensity | Peak | Mass     | Intensity | Peak | Mass    | Intensity |
|------|--------|-----------|------|----------|-----------|------|----------|-----------|------|----------|-----------|------|---------|-----------|
| 1    | 89.444 | 25.825    | 4    | 86.454   | 1341.00   | 0    | 497.592  | 9.08      | 10   | 806.023  | 99.861    | 4    | 807.522 | 100.000   |
|      | 81.453 | 744.085   | 3    | 1157.087 | 411.830   | 0    | 1163.040 | 4.00      | 11   | 1506.617 | 15.530    |      |         |           |

(B)

Figure S36. Annotated MS spectrum detected in area #9. (A) MS spectrum; (B) Peak list and sequence data.

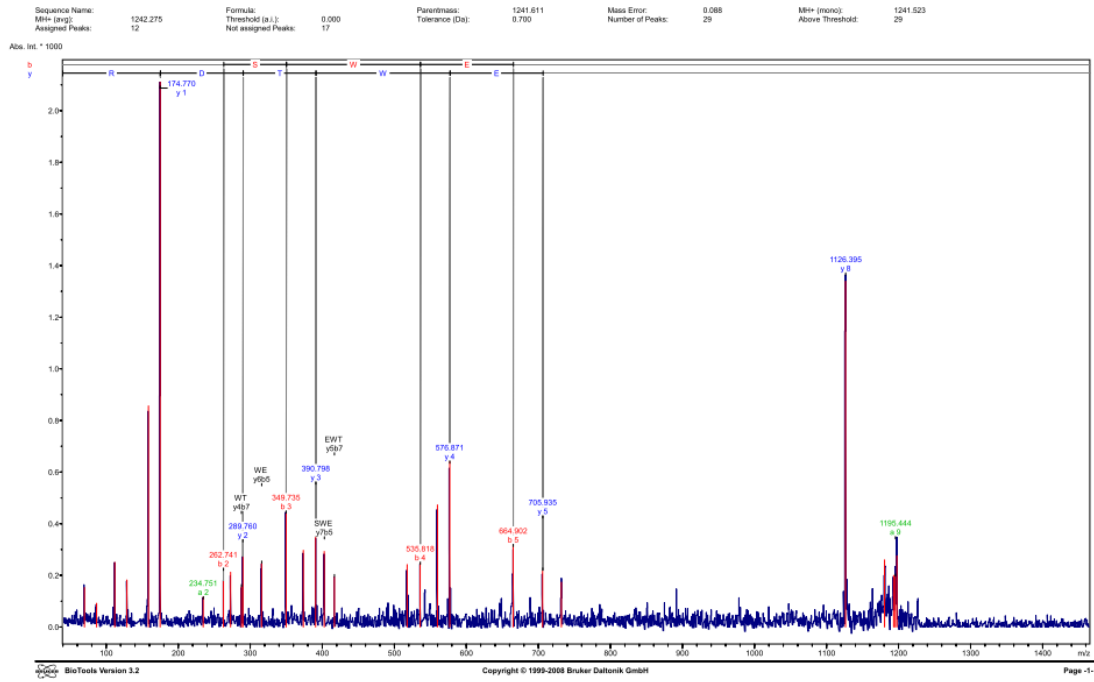

(A)

Display Parameter: Parentmass: 1241.611 Mass Error: 0.088 MH+ (mono): 1241.523 MH+ (avg): 1242.275 Threshold (a.l.): 0.000  
 Tolerance (Da): 0.700 Number of Peaks: 29 Above Threshold: 29 Assigned Peaks: 12 Not assigned Peaks: 17

| Peak | Mass     | Intensity | Peak | Mass     | Intensity | Peak | Mass     | Intensity | Peak | Mass     | Intensity | Peak | Mass     | Intensity |
|------|----------|-----------|------|----------|-----------|------|----------|-----------|------|----------|-----------|------|----------|-----------|
| 1    | 89.204   | 151.143   | 1    | 89.204   | 151.143   | 1    | 117.300  | 250.511   | 4    | 126.777  | 152.471   | 1    | 141.700  | 258.400   |
| 2    | 214.751  | 117.462   | 3    | 262.741  | 135.331   | 5    | 272.720  | 212.564   | 10   | 287.750  | 154.430   | 11   | 289.780  | 271.393   |
| 13   | 289.780  | 441.060   | 14   | 374.729  | 227.222   | 15   | 390.786  | 349.761   | 16   | 409.747  | 253.150   | 17   | 418.744  | 363.440   |
| 18   | 338.818  | 251.947   | 20   | 569.830  | 47.810    | 21   | 664.911  | 643.911   | 22   | 664.902  | 320.332   | 23   | 706.535  | 218.936   |
| 25   | 1126.395 | 1357.920  | 24   | 1126.395 | 200.318   | 27   | 1126.395 | 200.318   | 28   | 1195.444 | 190.504   | 29   | 1195.444 | 276.100   |

Calculated Masses:  
 DFSEWYDQR

| Id | Ion | a        | b        | y        | C-Term | Ion |
|----|-----|----------|----------|----------|--------|-----|
| 1  | D   | 89.100   | 118.000  | 126.100  | 0      | D   |
| 2  | F   | 215.100  | 215.100  | 200.100  | 0      | F   |
| 3  | S   | 322.140  | 322.140  | 391.184  | 7      | F   |
| 4  | W   | 269.210  | 269.210  | 272.273  | 0      | W   |
| 5  | E   | 137.200  | 444.200  | 708.213  | 0      | E   |
| 6  | W   | 133.241  | 651.241  | 636.240  | 0      | W   |
| 7  | F   | 624.380  | 624.380  | 999.292  | 3      | S   |
| 8  | D   | 109.210  | 109.210  | 1126.459 | 2      | D   |
| 9  | D   | 1195.811 | 1195.811 | 161.160  | 2      | D   |

BioTools Version 3.2 Copyright © 1999-2008 Bruker Daltonik GmbH Page 2-

(B)

Figure S37. Annotated MS/MS spectrum of ion 1241.611 *m/z* detected in area #10. (A) MS/MS spectrum; (B) Peak list and amino acid sequence.

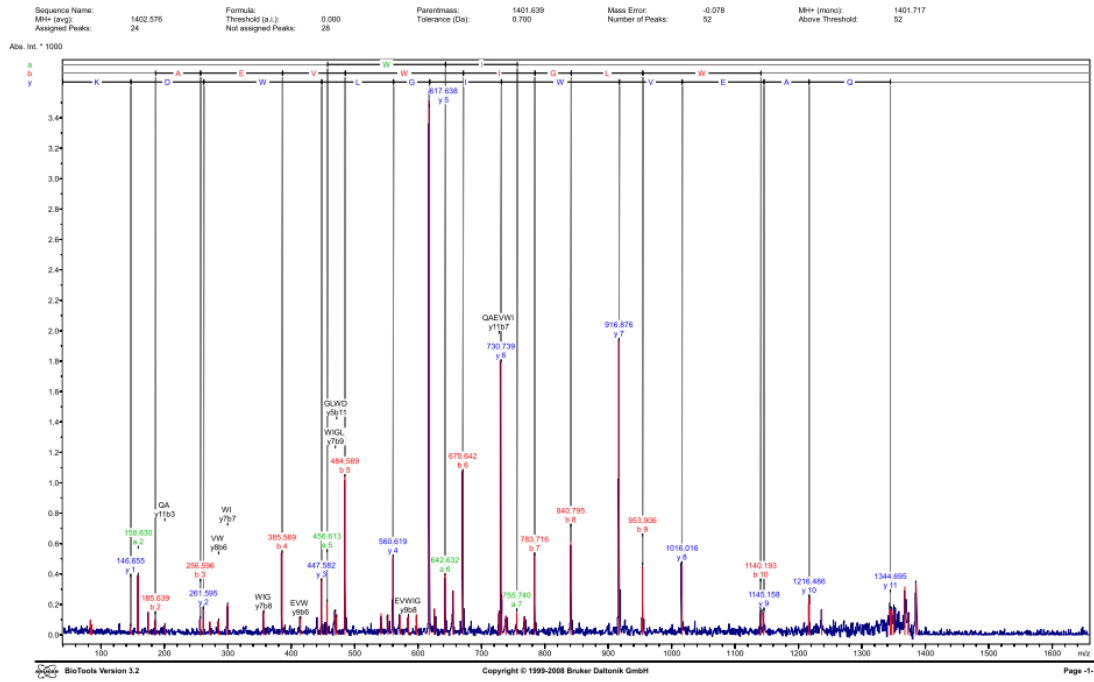

(A)

Display Parameter: Parentmass: 1401.639 Mass Error: -0.078 Mh+ (mono): 1401.717 Mh+ (avg): 1402.576 Threshold (a.i.): 0.000  
 Tolerance (Da): 0.700 Number of Peaks: 52 Above Threshold: 52 Assigned Peaks: 24 Not assigned Peaks: 26

Peaks:

| Peak | Mass     | Intensity | Peak | Mass     | Intensity | Peak | Mass     | Intensity | Peak | Mass     | Intensity | Peak | Mass     | Intensity | Peak | Mass     | Intensity |    |          |          |    |          |         |
|------|----------|-----------|------|----------|-----------|------|----------|-----------|------|----------|-----------|------|----------|-----------|------|----------|-----------|----|----------|----------|----|----------|---------|
| 81   | 81.030   | 91.540    | 1    | 85.071   | 15.000    | 3    | 145.055  | 83.330    | 4    | 148.030  | 89.870    | 5    | 174.027  | 148.930   | 6    | 185.030  | 98.950    |    |          |          |    |          |         |
| 13   | 103.059  | 28.523    | 2    | 105.058  | 15.300    | 8    | 117.054  | 108.112   | 9    | 121.050  | 86.180    | 11   | 125.050  | 20.250    | 12   | 129.050  | 102.510   |    |          |          |    |          |         |
| 10   | 139.064  | 167.897   | 14   | 155.065  | 254.030   | 15   | 171.061  | 130.889   | 16   | 187.061  | 109.050   | 17   | 203.061  | 330.150   | 18   | 219.061  | 275.180   |    |          |          |    |          |         |
| 12   | 155.064  | 140.267   | 20   | 171.060  | 118.810   | 21   | 187.056  | 1050.950  | 22   | 203.051  | 552.800   | 23   | 219.050  | 134.450   | 24   | 235.050  | 520.400   |    |          |          |    |          |         |
| 25   | 251.057  | 103.810   | 30   | 267.052  | 151.611   | 34   | 283.048  | 140.700   | 35   | 299.043  | 317.051   | 36   | 315.038  | 113.900   | 37   | 331.033  | 255.330   |    |          |          |    |          |         |
| 31   | 325.053  | 289.530   | 32   | 341.049  | 1045.920  | 33   | 357.044  | 141.030   | 38   | 373.039  | 1748.810  | 39   | 389.034  | 222.410   | 40   | 405.029  | 149.380   |    |          |          |    |          |         |
| 39   | 409.050  | 111.024   | 39   | 425.045  | 800.051   | 40   | 441.040  | 818.059   | 41   | 457.035  | 1205.031  | 42   | 473.030  | 456.910   | 43   | 489.025  | 269.910   |    |          |          |    |          |         |
| 43   | 1130.103 | 146.300   | 44   | 1146.098 | 190.377   | 45   | 1162.093 | 960.342   | 46   | 1178.088 | 148.260   | 47   | 1194.083 | 1341.660  | 48   | 1210.078 | 177.370   | 49 | 1226.073 | 1348.710 | 50 | 1242.068 | 667.830 |
| 50   | 1258.074 | 169.440   | 51   | 1274.069 | 337.950   | 52   | 1290.064 | 146.051   | 53   | 1306.059 | 339.870   |      |          |           |      |          |           |    |          |          |    |          |         |

Calculated Masses:  
 QKAEVWVWVGLWVQIYVWELQ

| No | Term | Ion      | a        | b        | y  | Cx | Term | Ion |
|----|------|----------|----------|----------|----|----|------|-----|
| 1  | G    | 30.032   | 168.020  | 147.913  | 12 | K  |      |     |
| 2  | D    | 158.026  | 168.020  | 792.400  | 11 | D  |      |     |
| 3  | A    | 226.130  | 287.120  | 448.213  | 10 | V  |      |     |
| 4  | E    | 355.174  | 385.164  | 611.303  | 9  | E  |      |     |
| 5  | V    | 457.841  | 468.231  | 618.253  | 8  | V  |      |     |
| 6  | I    | 44.230   | 413.211  | 711.400  | 7  | I  |      |     |
| 7  | L    | 756.404  | 764.390  | 917.489  | 6  | L  |      |     |
| 8  | Q    | 814.470  | 841.420  | 1016.569 | 5  | Q  |      |     |
| 9  | W    | 105.050  | 854.951  | 1155.951 | 4  | W  |      |     |
| 10 | V    | 1117.850 | 1148.881 | 1216.930 | 3  | A  |      |     |
| 11 | D    | 1242.010 | 1270.811 | 1244.891 | 2  | D  |      |     |
| 12 | K    | 1356.110 | 1383.700 | 1481.710 | 1  | K  |      |     |

BioTools Version 3.2 Copyright © 1999-2008 Bruker Daltonik GmbH Page 2-

(B)

Figure S38. Annotated MS/MS spectrum of ion 1401.639 *m/z* detected in area #10. (A) MS/MS spectrum; (B) Peak list and amino acid sequence.

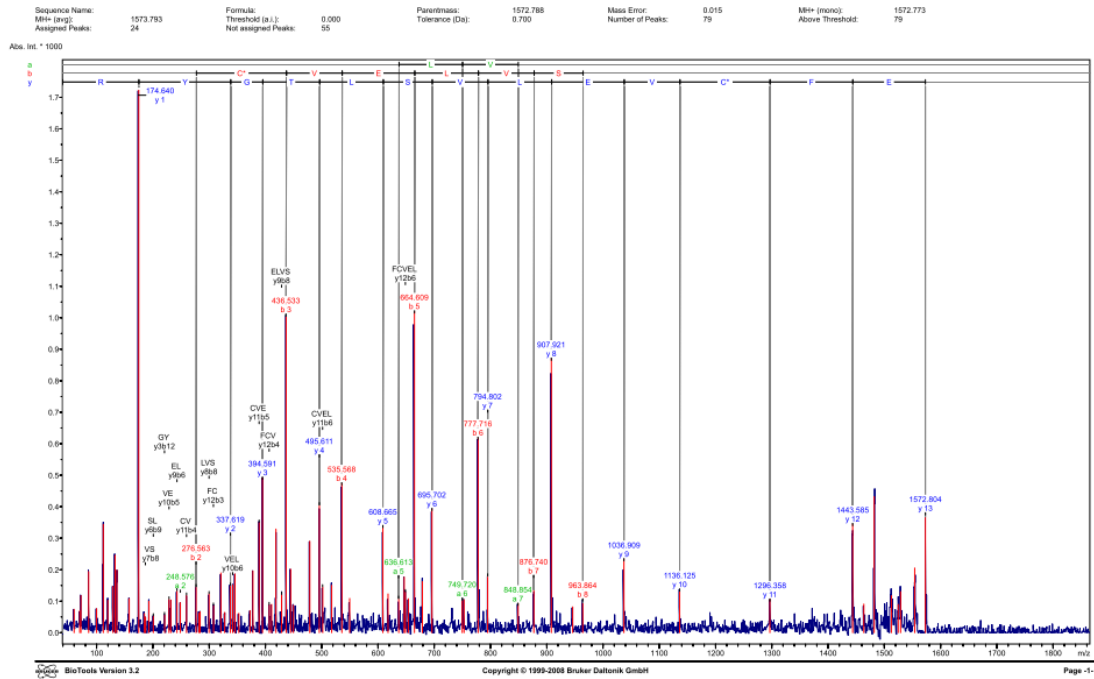

(A)

Display Parameter: Parentmass: 1572.788 Mass Error: 0.015 M<sup>+</sup> (mono): 1572.773 M<sup>+</sup> (avg): 1573.793 Threshold (a.l.): 0.000  
 Tolerance (Da): 0.700 Number of Peaks: 79 Above Threshold: 79 Assigned Peaks: 24 Not assigned Peaks: 55

| Peak | Mass     | Intensity | Peak | Mass     | Intensity | Peak | Mass     | Intensity | Peak | Mass     | Intensity | Peak | Mass     | Intensity |
|------|----------|-----------|------|----------|-----------|------|----------|-----------|------|----------|-----------|------|----------|-----------|
| 1    | 59.734   | 67.275    | 2    | 69.750   | 10.611    | 3    | 117.917  | 119.730   | 4    | 86.732   | 124.420   | 5    | 91.723   | 26.544    |
| 6    | 119.654  | 1.00001   | 7    | 129.714  | 127.113   | 8    | 132.280  | 236.900   | 10   | 136.560  | 128.020   | 11   | 157.424  | 103.610   |
| 12   | 184.692  | 61.891    | 13   | 169.269  | 33.442    | 14   | 172.832  | 99.804    | 15   | 209.990  | 149.491   | 16   | 220.250  | 169.910   |
| 18   | 231.818  | 103.539   | 20   | 242.588  | 159.330   | 21   | 248.576  | 86.585    | 22   | 269.593  | 118.327   | 23   | 276.583  | 148.193   |
| 25   | 278.019  | 66.541    | 26   | 296.820  | 193.320   | 27   | 307.834  | 96.333    | 28   | 320.714  | 199.741   | 29   | 327.531  | 84.114    |
| 31   | 341.817  | 151.944   | 32   | 349.560  | 166.267   | 33   | 352.200  | 61.511    | 34   | 377.493  | 31.251    | 35   | 377.570  | 198.380   |
| 36   | 384.801  | 68.820    | 37   | 426.569  | 18.261    | 38   | 431.261  | 89.165    | 39   | 418.455  | 28.820    | 41   | 448.684  | 121.837   |
| 43   | 444.690  | 207.320   | 44   | 449.557  | 87.173    | 45   | 478.327  | 290.942   | 46   | 485.611  | 434.627   | 47   | 501.931  | 144.450   |
| 48   | 502.669  | 474.729   | 49   | 474.516  | 108.660   | 51   | 498.664  | 248.664   | 52   | 497.454  | 141.430   | 53   | 496.916  | 108.154   |
| 54   | 528.755  | 129.580   | 55   | 544.647  | 101.250   | 56   | 554.200  | 1092.591  | 58   | 576.590  | 142.247   | 59   | 586.916  | 69.126    |
| 61   | 732.790  | 1.04834   | 62   | 777.716  | 611.200   | 63   | 782.900  | 178.900   | 65   | 848.854  | 38.130    | 66   | 878.740  | 130.160   |
| 68   | 848.844  | 81.659    | 69   | 863.664  | 34.826    | 70   | 1070.200 | 233.119   | 71   | 1138.124 | 119.820   | 72   | 1226.261 | 107.410   |
| 73   | 1483.472 | 30.960    | 74   | 1481.666 | 43.831    | 75   | 1512.281 | 117.407   | 76   | 1524.134 | 89.572    | 77   | 1528.841 | 130.674   |
| 78   | 1572.804 | 307.730   |      |          |           |      |          |           |      |          |           |      |          |           |

Calculated Masses:  
 EFCVELSLTYGR 3: Carbamidomethyl (C)

| R.T. (min) | Ion | a        | b       | y        | C-Term | Ion |
|------------|-----|----------|---------|----------|--------|-----|
| 1          | E   | 249.059  | 126.029 | 175.119  | 13     | D   |
| 2          | F   | 249.129  | 126.099 | 175.189  | 14     | F   |
| 3          | CV  | 406.150  | 203.070 | 305.261  | 11     | G   |
| 4          | V   | 406.220  | 203.140 | 305.331  | 10     | G   |
| 5          | E   | 437.261  | 218.131 | 339.333  | 9      | L   |
| 6          | L   | 437.331  | 218.201 | 339.403  | 8      | L   |
| 7          | V   | 469.411  | 234.211 | 375.424  | 7      | V   |
| 8          | L   | 469.481  | 234.281 | 375.494  | 6      | L   |
| 9          | L   | 1029.521 | 514.761 | 1237.561 | 2      | L   |
| 10         |     | 1109.051 | 554.791 | 1138.831 | 4      | V   |
| 11         | G   | 1209.051 | 604.821 | 1206.861 | 3      | C   |
| 12         | V   | 1370.660 | 685.330 | 1449.790 | 2      | F   |
| 13         | R   | 1526.761 | 763.381 | 1572.771 | 1      | E   |

Copyright © 1999-2008 Bruker Daltonik GmbH

(B)

Figure S39. Annotated MS/MS spectrum of ion 1572.788 *m/z* detected in area #10. (A) MS/MS spectrum; (B) Peak list and amino acid sequence.

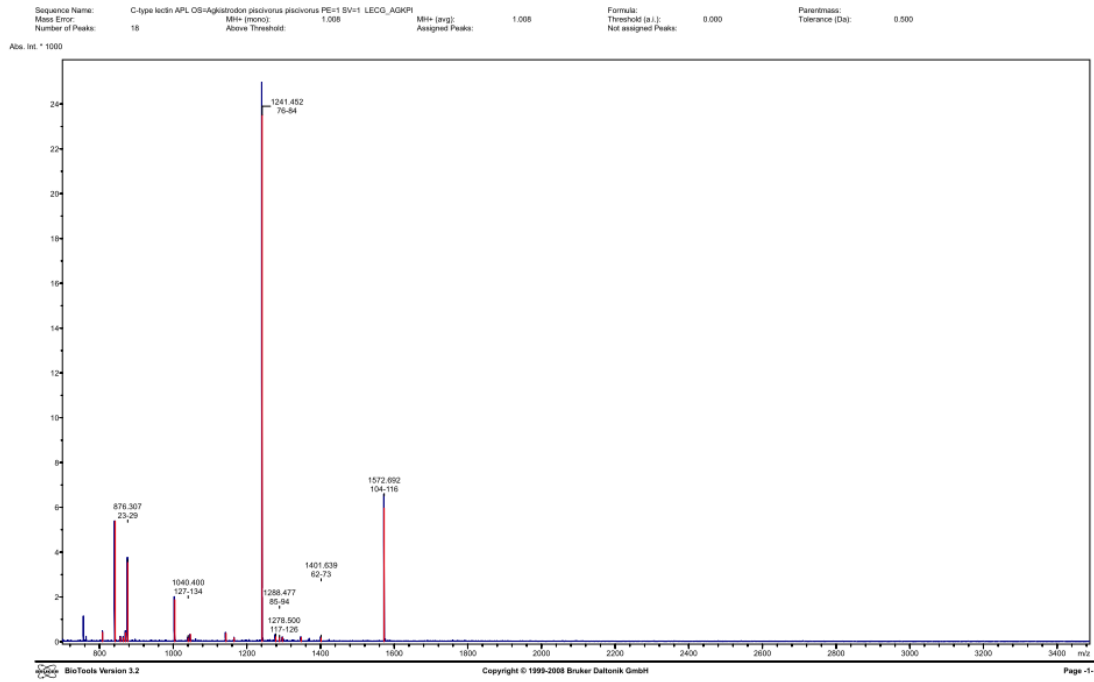

(A)

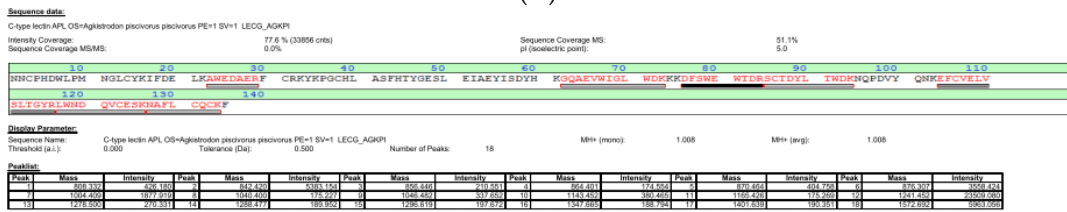

(B)

Figure S40. Annotated MS spectrum detected in area #10. (A) MS spectrum; (B) Peak list and sequence data.



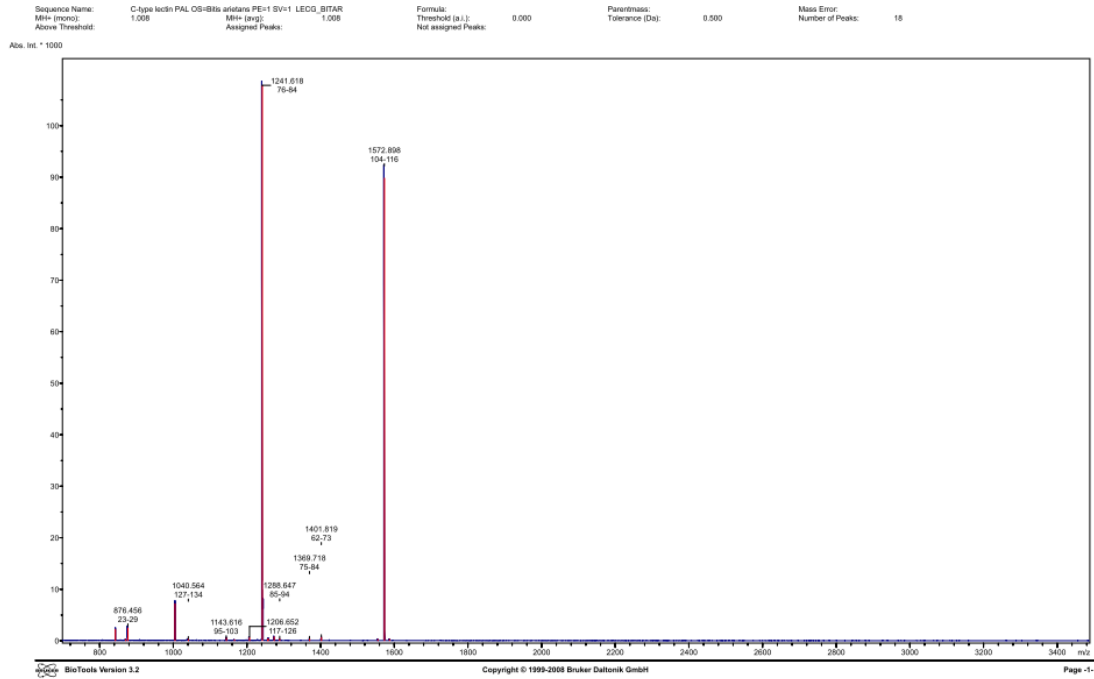

(A)

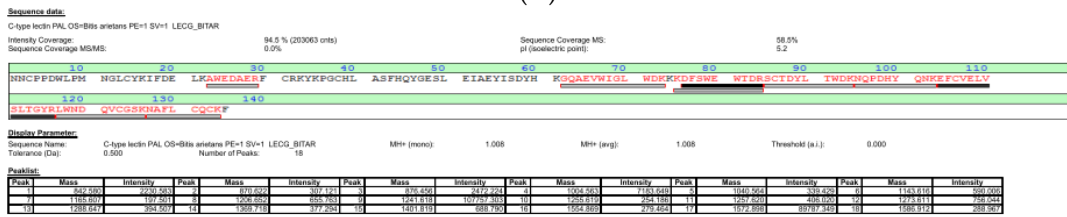

(B)

Figure S41. Annotated MS spectrum detected in area #10. (A) MS spectrum; (B) Peak list and sequence data.
